# Supplementary material for: Metavisitor, a Suite of Galaxy Tools for Simple and Rapid Detection and Discovery of Viruses in Deep Sequence Data
Source: PubMed Central journal article supplement (PMC5207757; doi:10.1371/journal.pone.0168397), 2017-01-03
Supplement: pone.0168397.s002.pdf [file pone.0168397.s002.pdf]

## Supplementary Figure S2

| 1                                                                                                     | 2         | 3           | 4            | 5          | 6            | 7       | 8        |
|-------------------------------------------------------------------------------------------------------|-----------|-------------|--------------|------------|--------------|---------|----------|
| # SeqId                                                                                               | %Identity | AlignLength | StartSubject | EndSubject | %QueryHitCov | E-value | BitScore |
| #                                                                                                     |           |             |              |            |              |         |          |
| # gij157325505 gb DQ321720.2 _Nora_virus,_complete_genome                                             |           |             |              |            |              |         |          |
| # Subject Length: 11908                                                                               |           |             |              |            |              |         |          |
| # Total Subject Coverage: 8338                                                                        |           |             |              |            |              |         |          |
| # Relative Subject Coverage: 0.70020154518                                                            |           |             |              |            |              |         |          |
| # Best Bit Score: 10502.0                                                                             |           |             |              |            |              |         |          |
| # Mean Bit Score: 4066.30769231                                                                       |           |             |              |            |              |         |          |
| Locus_3_Transcript_33/33_Confidence_0.000_Length_1728                                                 | 97.11     | 1730        | 11890        | 10161      | 99.9         | 0.0     | 2892.0   |
| Locus_3_Transcript_3/33_Confidence_0.029_Length_1261                                                  | 98.1      | 1261        | 6840         | 5580       | 99.9         | 0.0     | 2167.0   |
| Locus_3_Transcript_2/33_Confidence_0.057_Length_1264                                                  | 98.1      | 1261        | 6840         | 5580       | 99.7         | 0.0     | 2167.0   |
| Locus_3_Transcript_31/33_Confidence_0.114_Length_3832                                                 | 96.16     | 3724        | 11890        | 8167       | 97.1         | 0.0     | 6066.0   |
| Locus_3_Transcript_31/33_Confidence_0.114_Length_3832                                                 | 96.09     | 128         | 1807         | 1680       | 3.3          | 1e-50   | 208.0    |
| Locus_3_Transcript_30/33_Confidence_0.171_Length_4066                                                 | 96.26     | 4038        | 11890        | 7853       | 99.2         | 0.0     | 6596.0   |
| Locus_3_Transcript_6/33_Confidence_0.057_Length_1925                                                  | 97.66     | 1925        | 5605         | 3681       | 99.9         | 0.0     | 3268.0   |
| Locus_3_Transcript_29/33_Confidence_0.171_Length_4089                                                 | 96.24     | 4093        | 11890        | 7798       | 100.0        | 0.0     | 6682.0   |
| Locus_3_Transcript_32/33_Confidence_0.057_Length_6307                                                 | 96.93     | 6311        | 11890        | 5580       | 100.0        | 0.0     | 10502.0  |
| Locus_3_Transcript_1/33_Confidence_0.057_Length_650                                                   | 98.77     | 649         | 7463         | 6815       | 99.7         | 0.0     | 1135.0   |
| Locus_3_Transcript_4/33_Confidence_0.086_Length_2045                                                  | 98.18     | 2033        | 6840         | 4808       | 99.4         | 0.0     | 3499.0   |
| Locus_3_Transcript_24/33_Confidence_0.086_Length_2244                                                 | 98.22     | 2244        | 7823         | 5580       | 100.0        | 0.0     | 3867.0   |
| Locus_3_Transcript_5/33_Confidence_0.086_Length_2212                                                  | 98.24     | 2212        | 6840         | 4629       | 100.0        | 0.0     | 3813.0   |
| #                                                                                                     |           |             |              |            |              |         |          |
| # gij822478537 gb KP970100.1 _Nora_virus_isolate_GEO58_gp1_(gp1)_gene,_partial_cds;_and_replication_p |           |             |              |            |              |         |          |
| # Subject Length: 11416                                                                               |           |             |              |            |              |         |          |
| # Total Subject Coverage: 2463                                                                        |           |             |              |            |              |         |          |
| # Relative Subject Coverage: 0.215749824807                                                           |           |             |              |            |              |         |          |
| # Best Bit Score: 4028.0                                                                              |           |             |              |            |              |         |          |
| # Mean Bit Score: 3607.0                                                                              |           |             |              |            |              |         |          |
| Locus_3_Transcript_22/33_Confidence_0.114_Length_2104                                                 | 96.29     | 2105        | 9693         | 7589       | 100.0        | 0.0     | 3442.0   |
| Locus_3_Transcript_23/33_Confidence_0.143_Length_2464                                                 | 96.31     | 2463        | 9693         | 7231       | 99.9         | 0.0     | 4028.0   |
| Locus_3_Transcript_20/33_Confidence_0.086_Length_2049                                                 | 96.29     | 2050        | 9693         | 7644       | 100.0        | 0.0     | 3351.0   |
