# Supplementary material for: Metavisitor, a Suite of Galaxy Tools for Simple and Rapid Detection and Discovery of Viruses in Deep Sequence Data
Source: PubMed Central journal article supplement (PMC5207757; doi:10.1371/journal.pone.0168397), 2017-01-03

Readmaps and size distributions

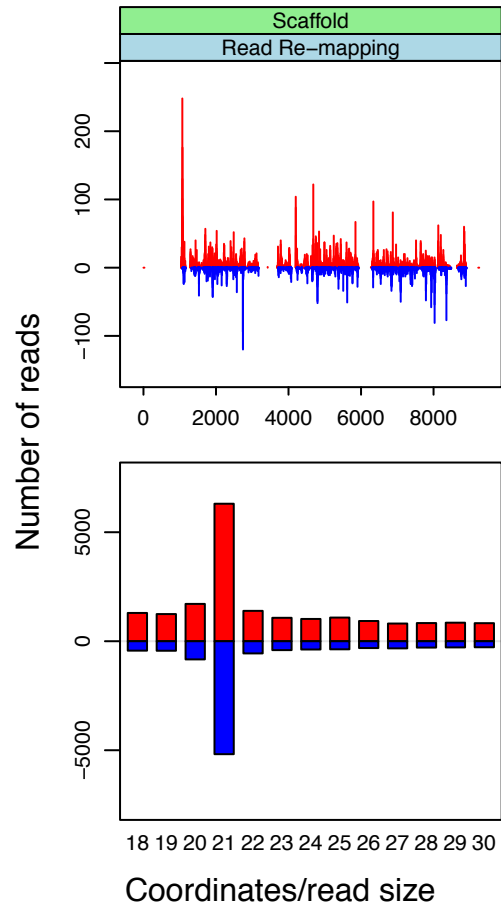

Supplement: pone.0168397.s009.pdf [file pone.0168397.s009.pdf]
