# Supplementary material for: Metavisitor, a Suite of Galaxy Tools for Simple and Rapid Detection and Discovery of Viruses in Deep Sequence Data
Source: PubMed Central journal article supplement (PMC5207757; doi:10.1371/journal.pone.0168397), 2017-01-03
Supplement: pone.0168397.s027.pdf [file pone.0168397.s027.pdf]

# Readmaps and size distributions

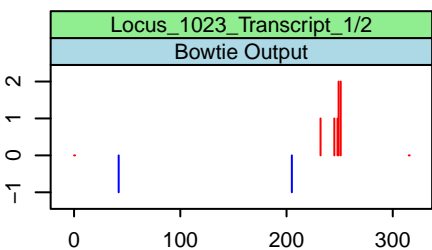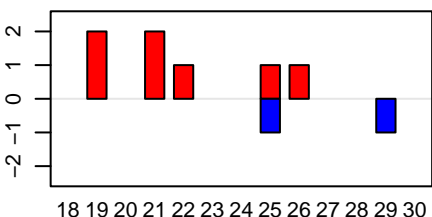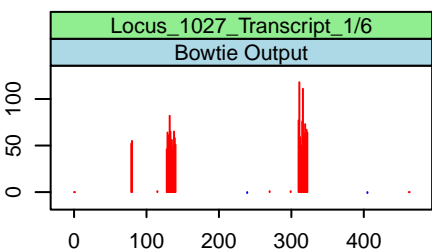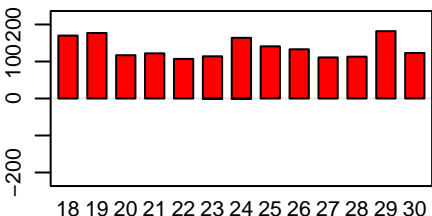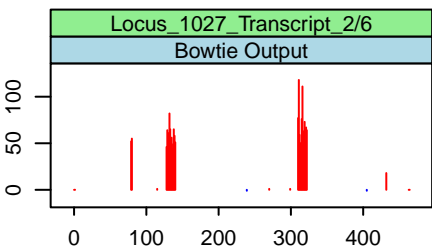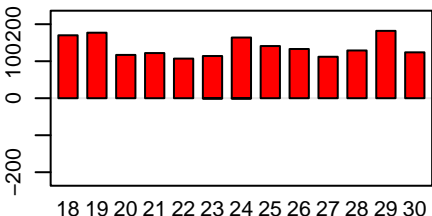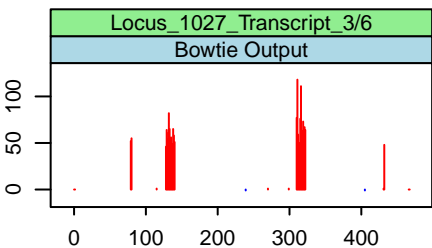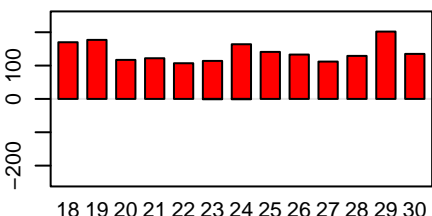

Coordinates/read size

Number of reads

# Readmaps and size distributions

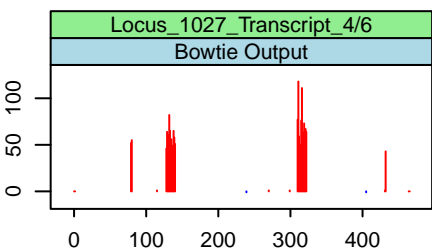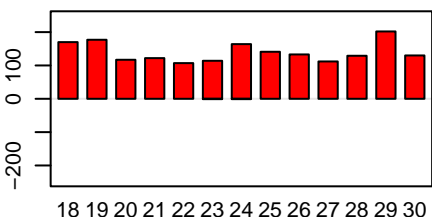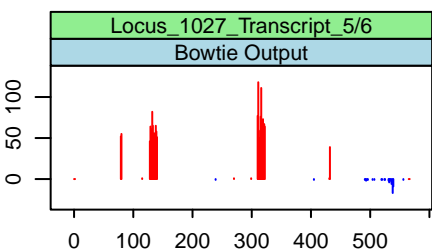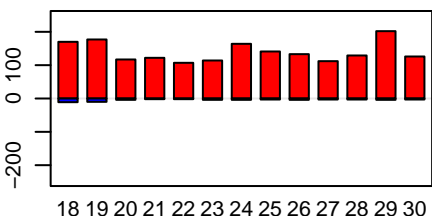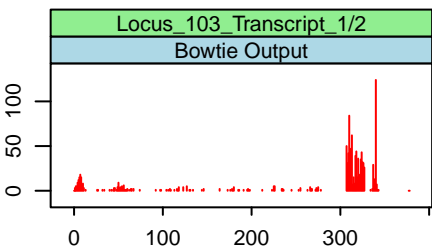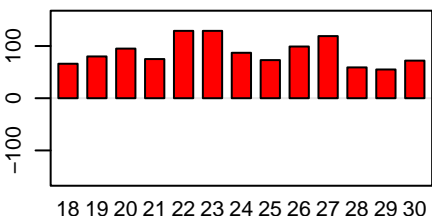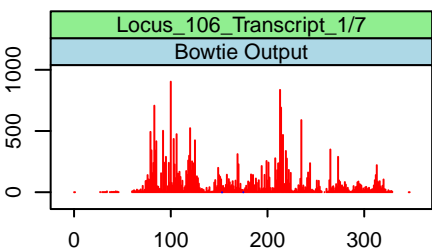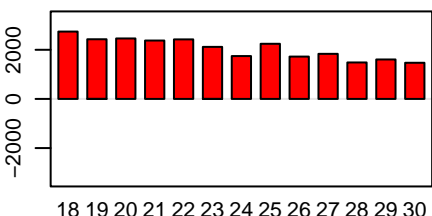

Coordinates/read size

# Readmaps and size distributions

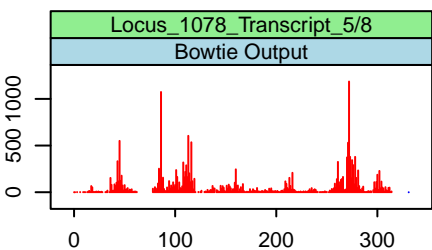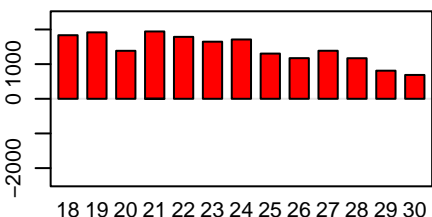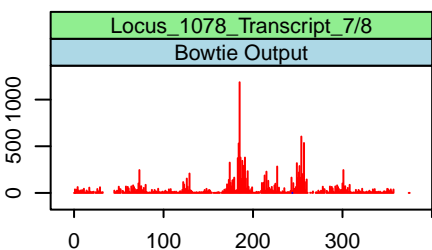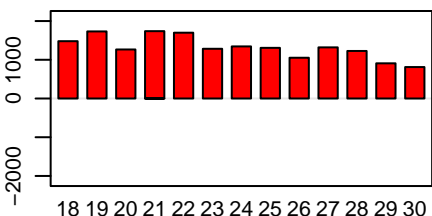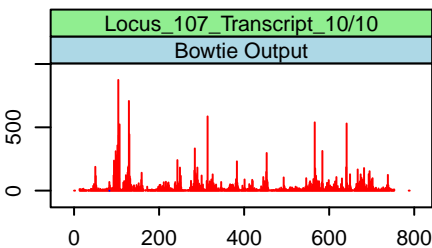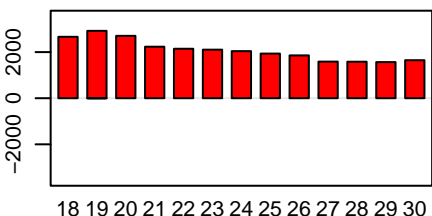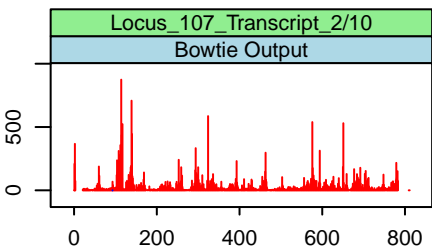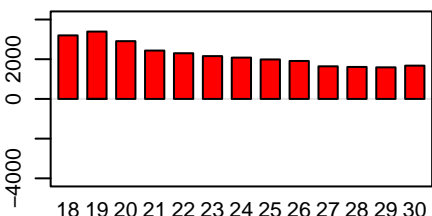

Coordinates/read size

Number of reads

# Readmaps and size distributions

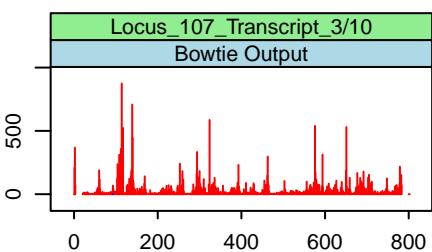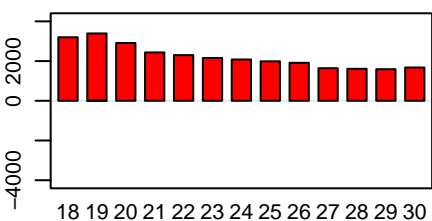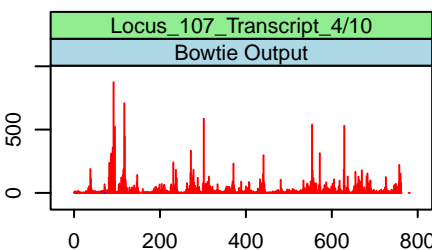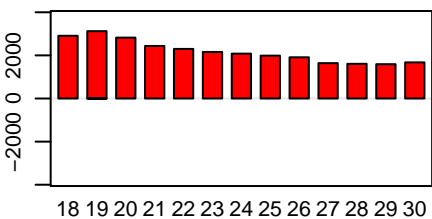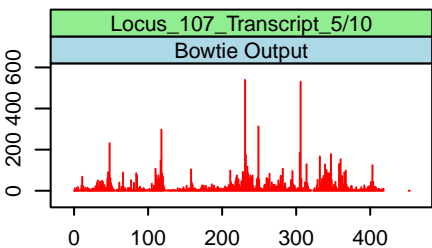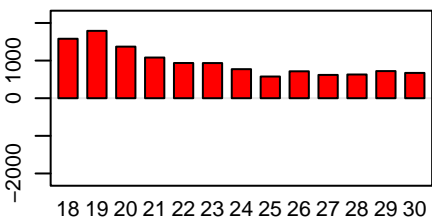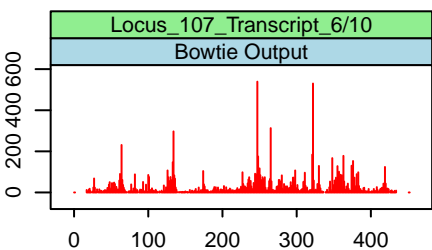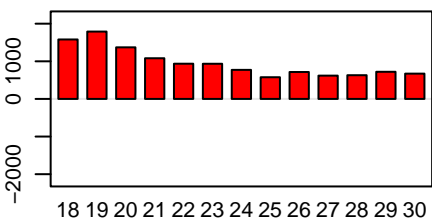

Coordinates/read size

# Readmaps and size distributions

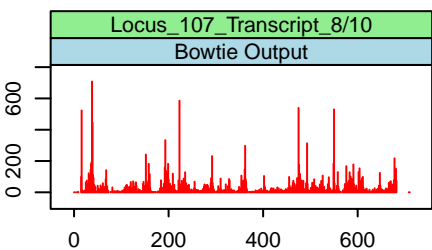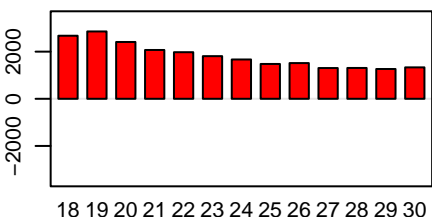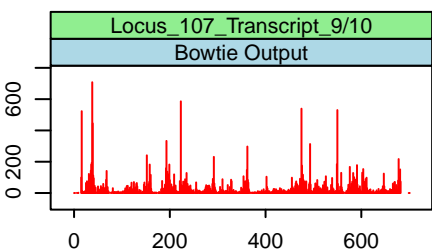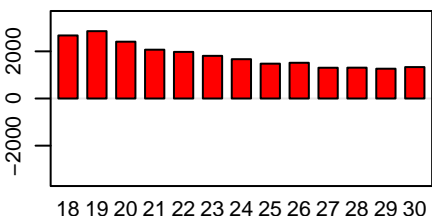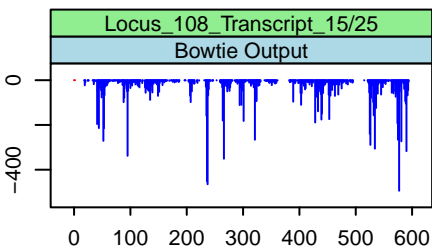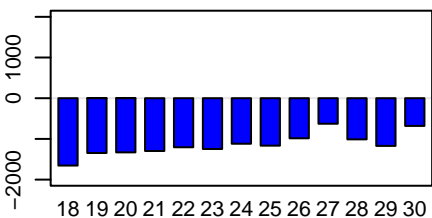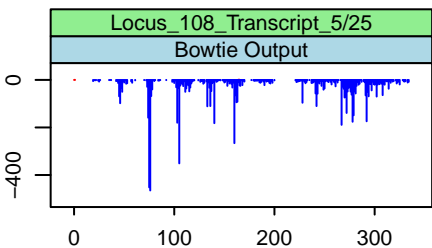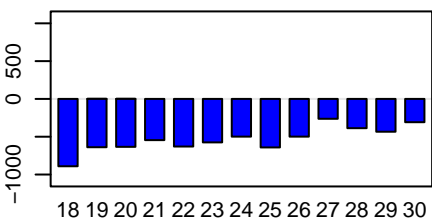

Coordinates/read size

# Readmaps and size distributions

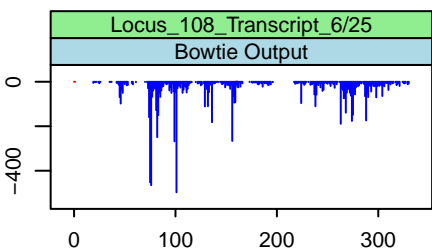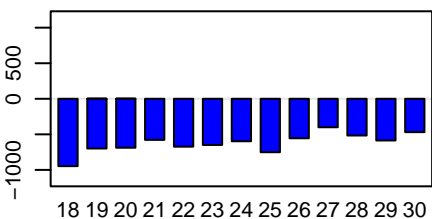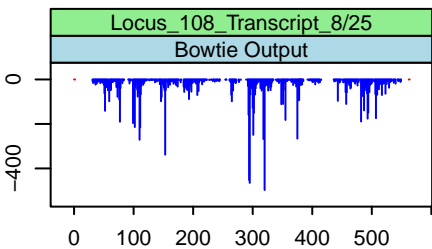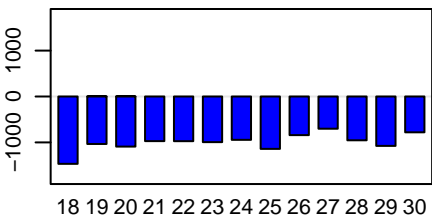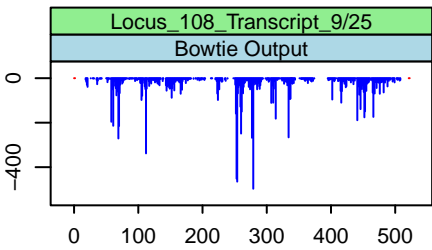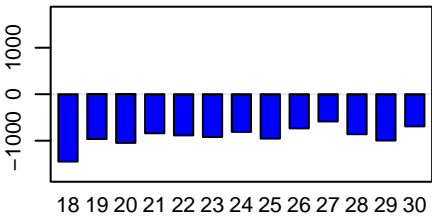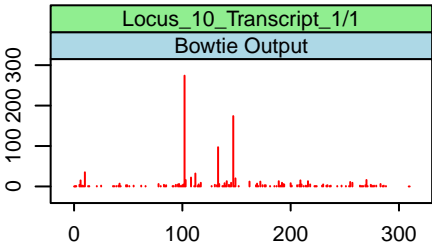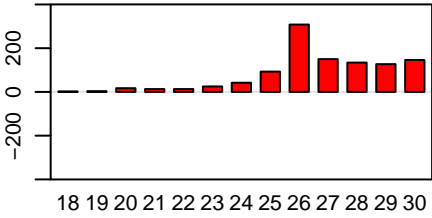

Coordinates/read size

Number of reads

# Readmaps and size distributions

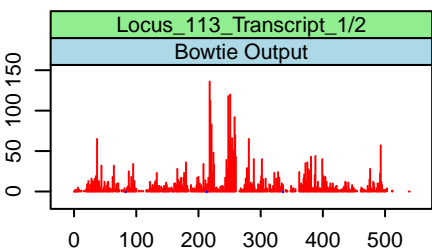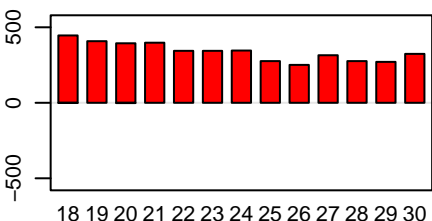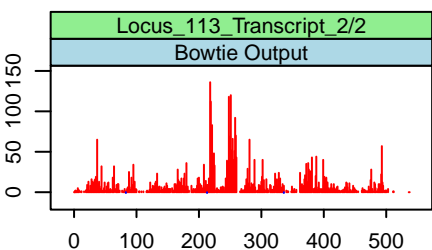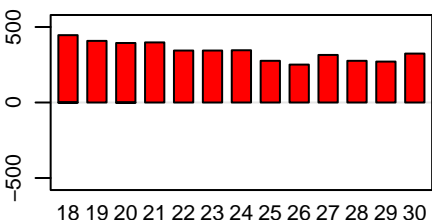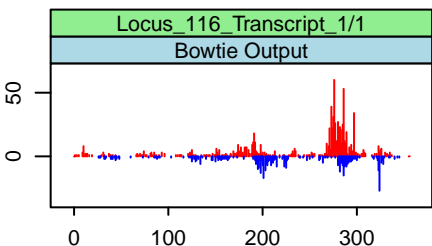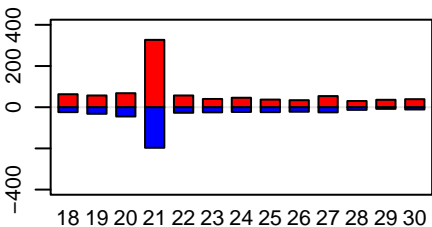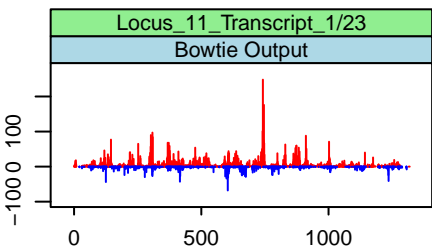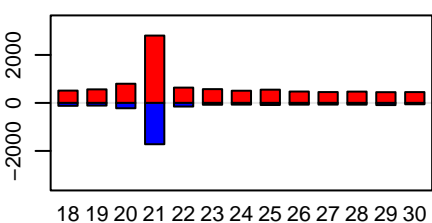

Coordinates/read size

# Readmaps and size distributions

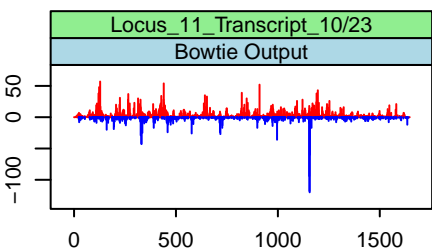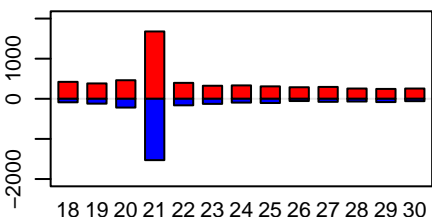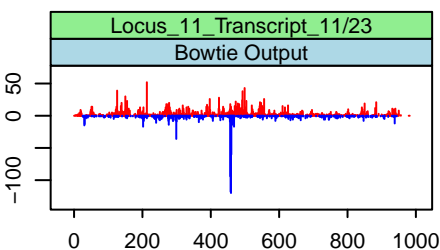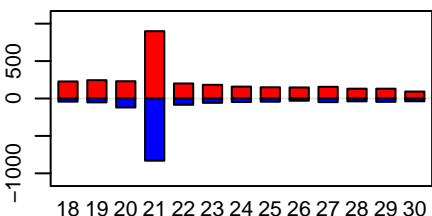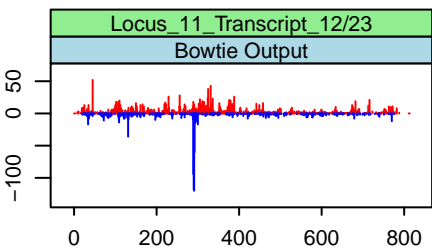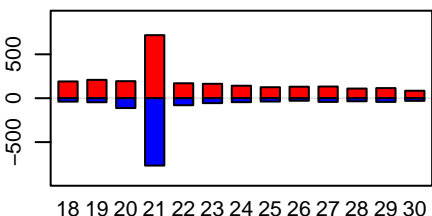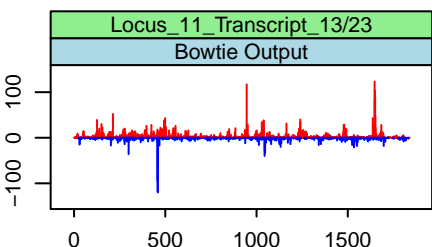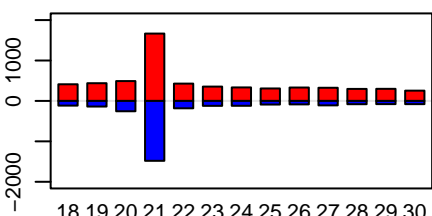

Coordinates/read size



# Readmaps and size distributions

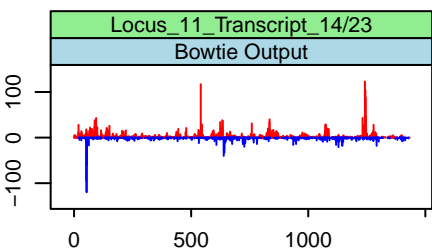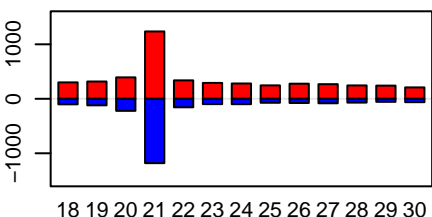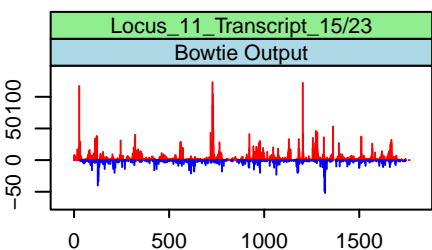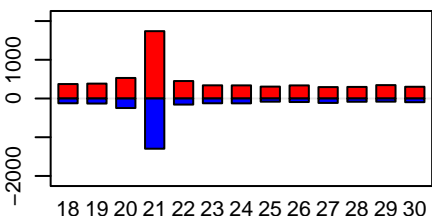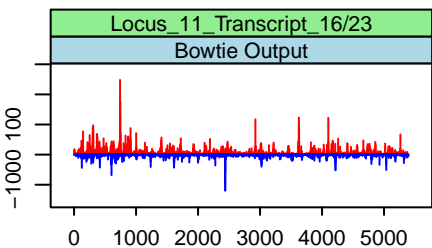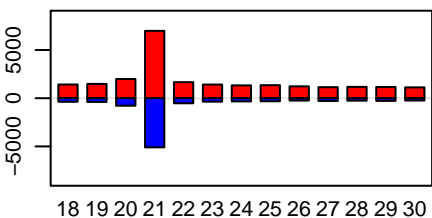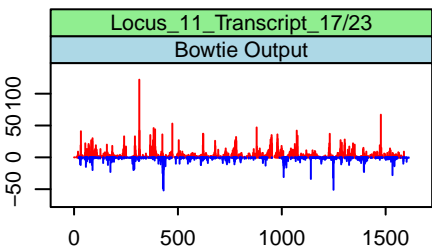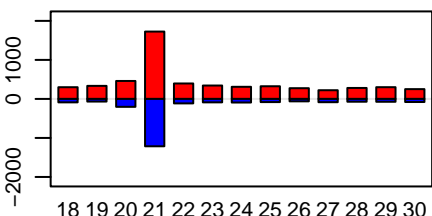

Coordinates/read size

# Readmaps and size distributions

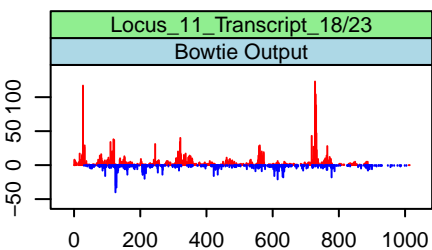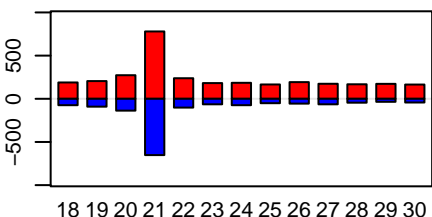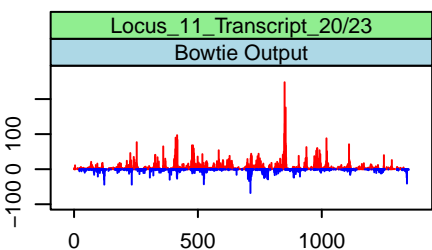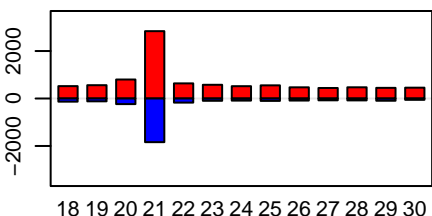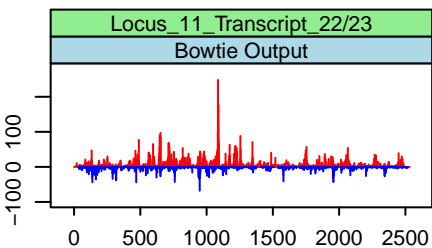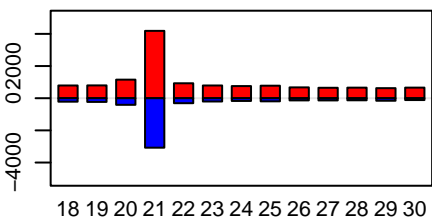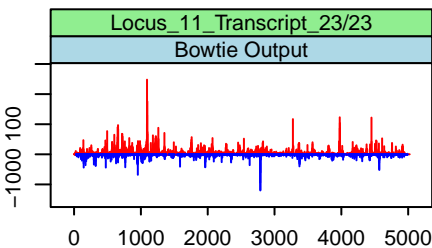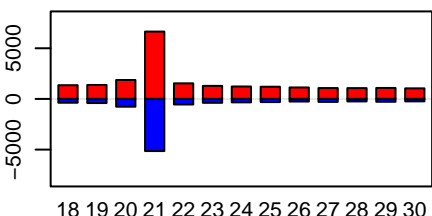

Coordinates/read size

# Readmaps and size distributions

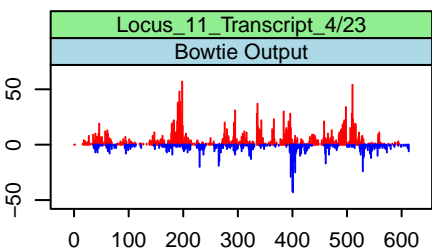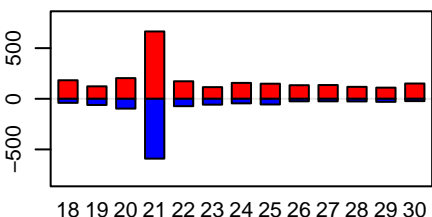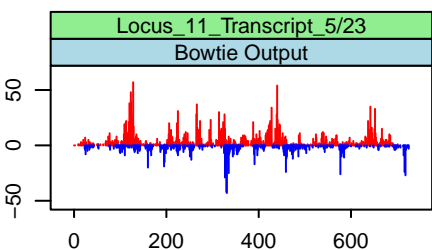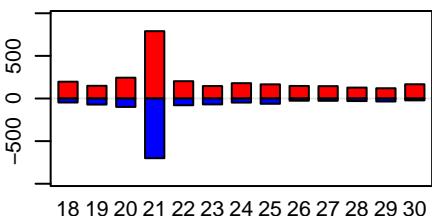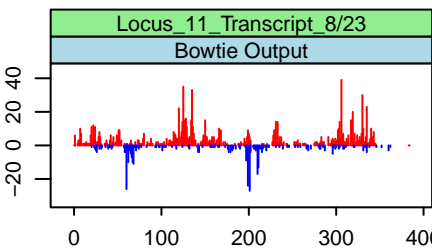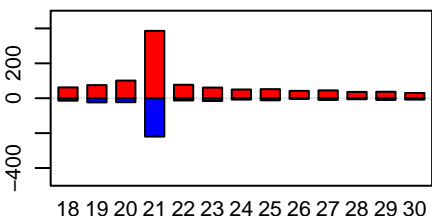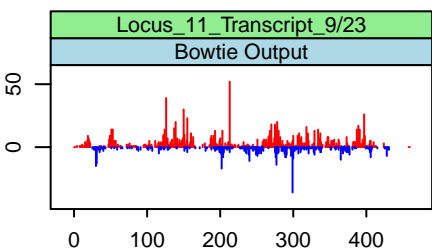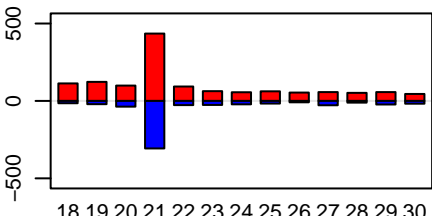

Coordinates/read size

# Readmaps and size distributions

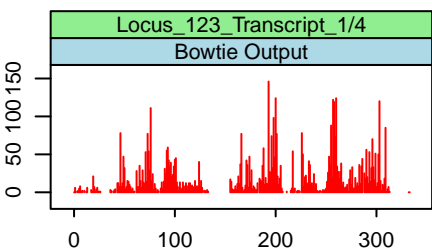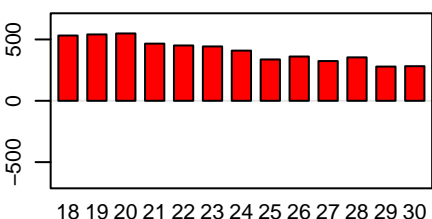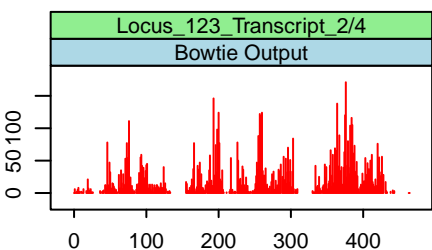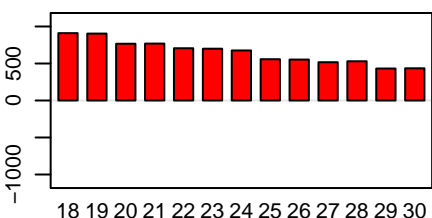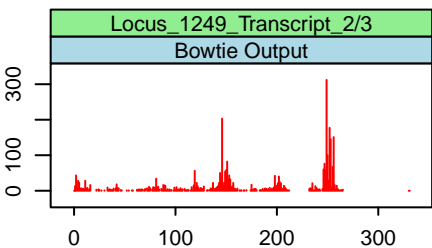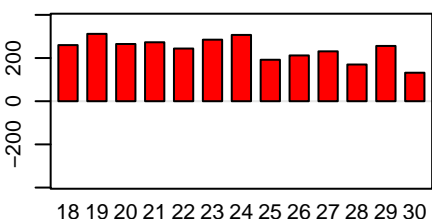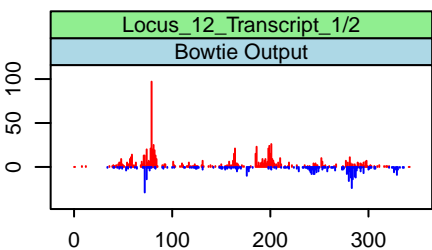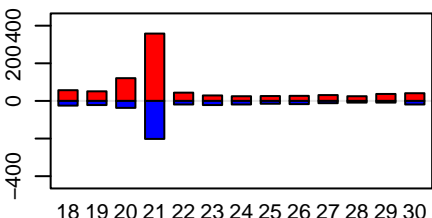

Coordinates/read size

# Readmaps and size distributions

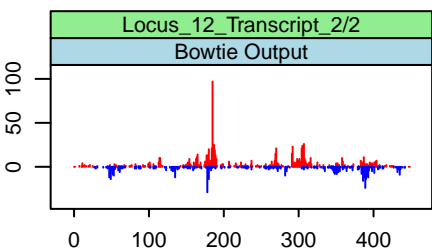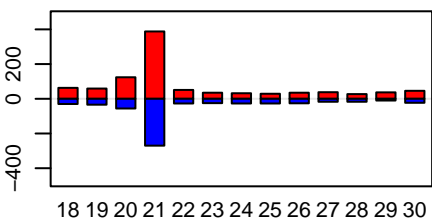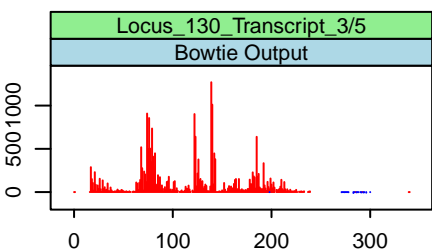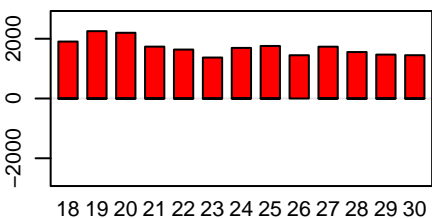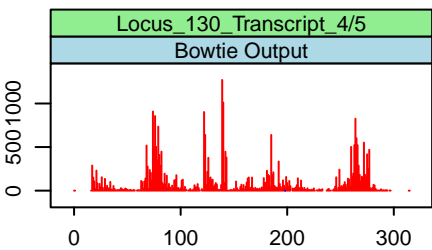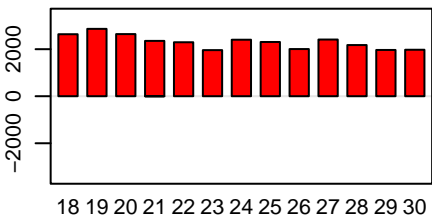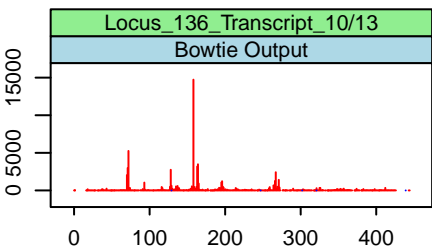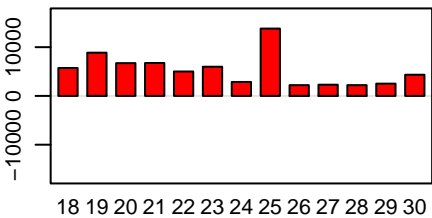

Coordinates/read size

# Readmaps and size distributions

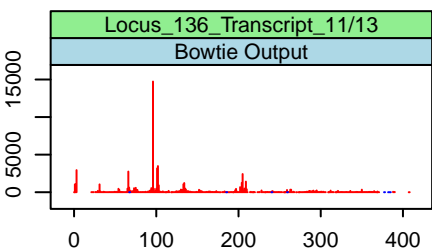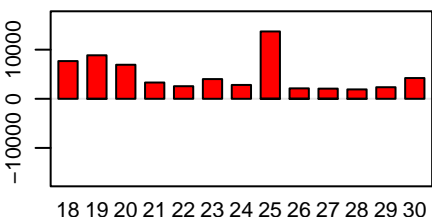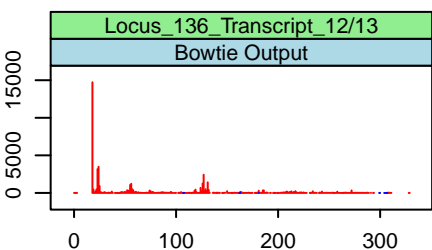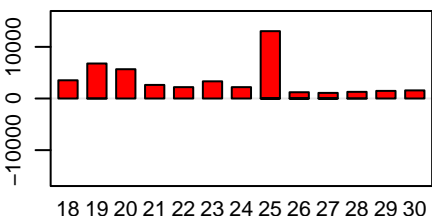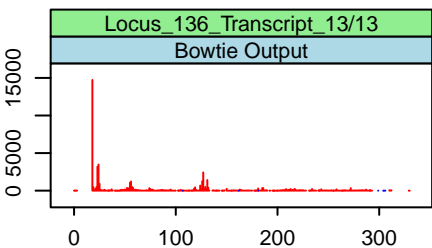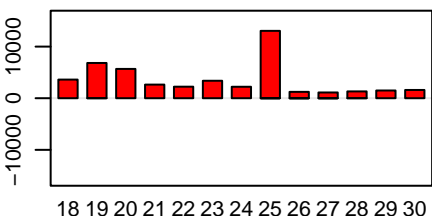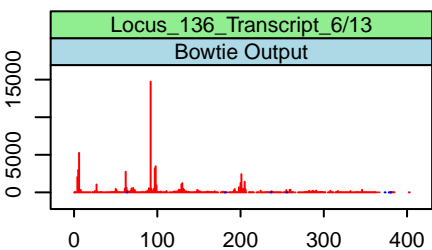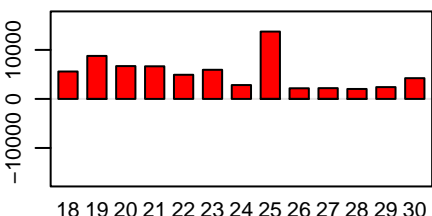

Coordinates/read size

# Readmaps and size distributions

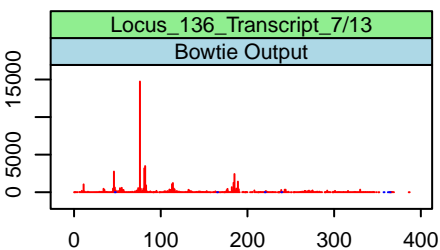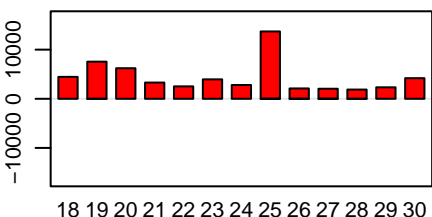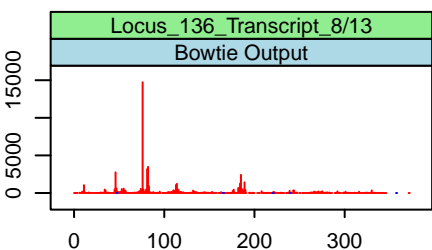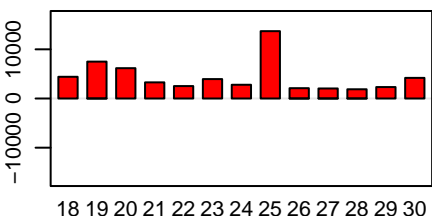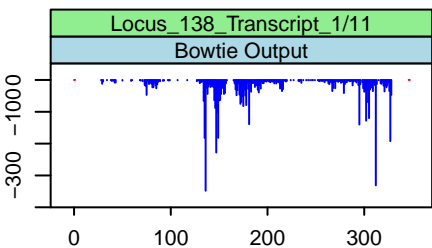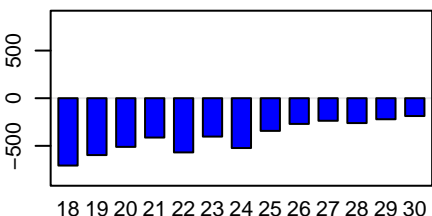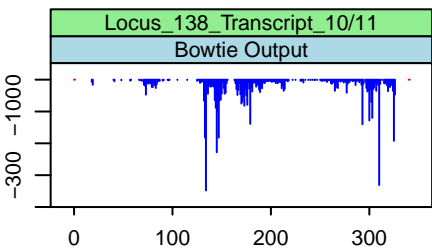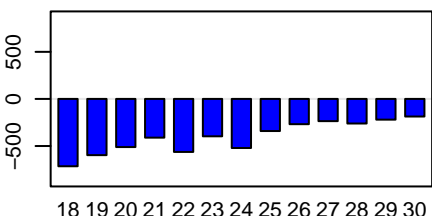

Coordinates/read size

# Readmaps and size distributions

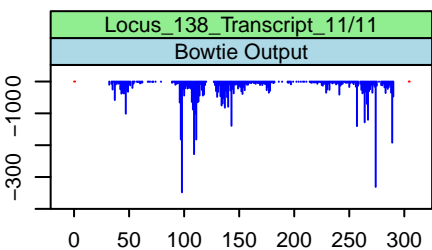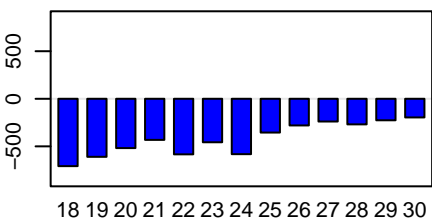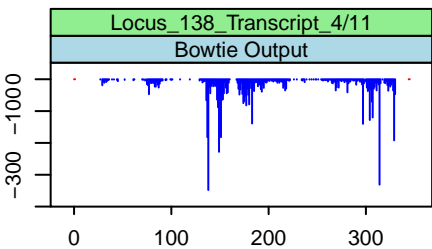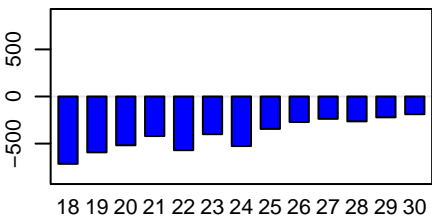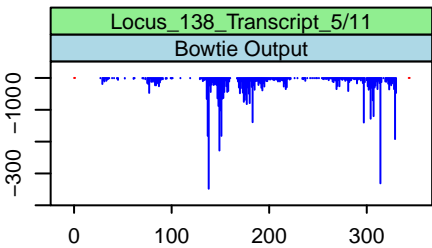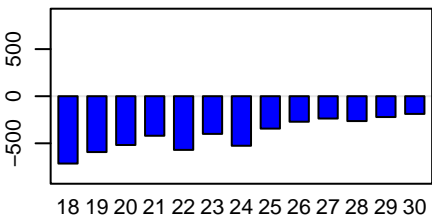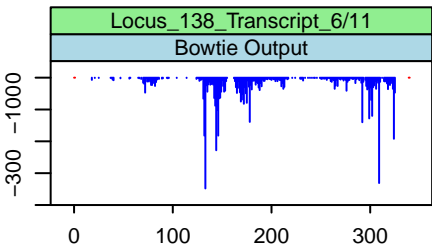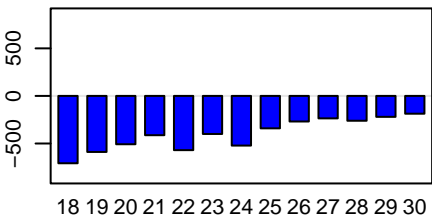

Coordinates/read size



# Readmaps and size distributions

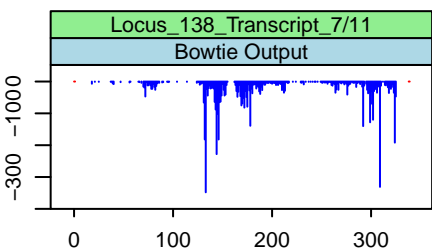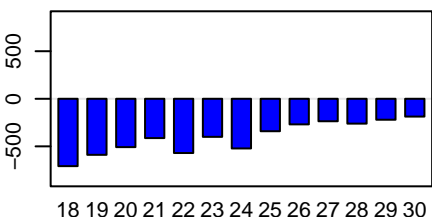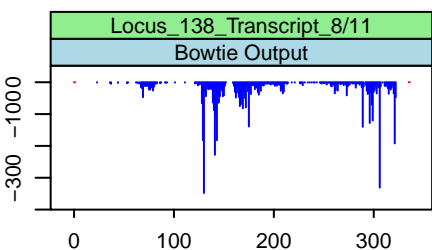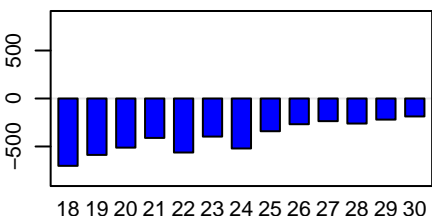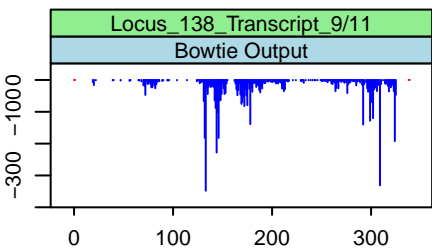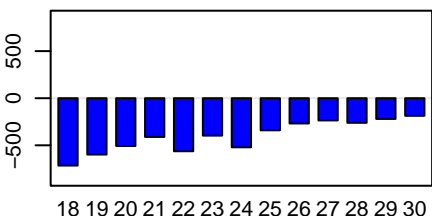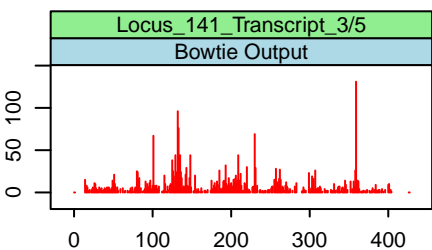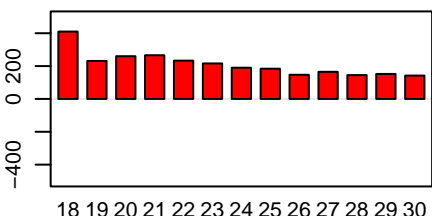

Coordinates/read size

# Readmaps and size distributions

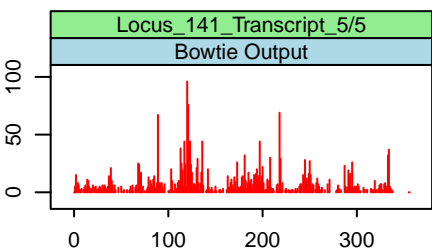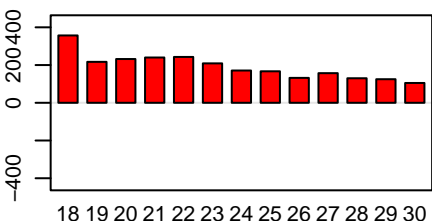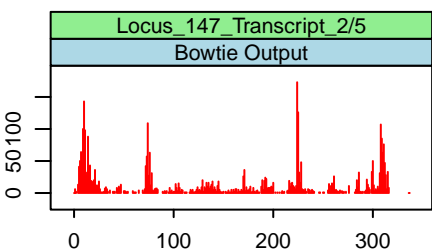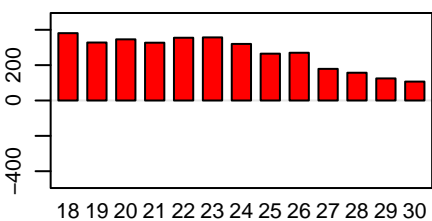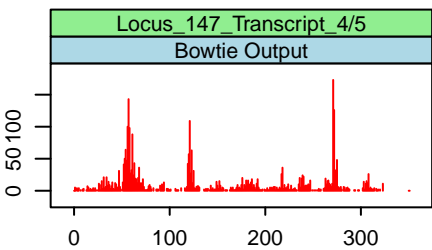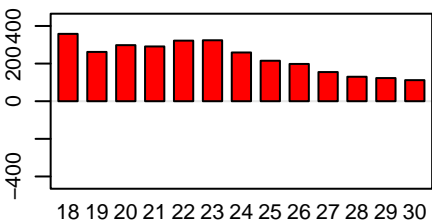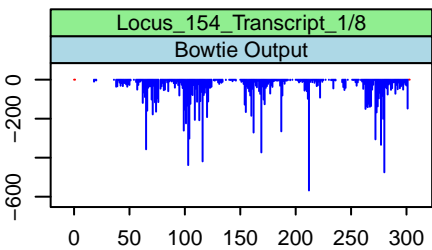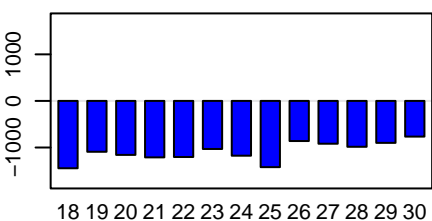

Coordinates/read size

# Readmaps and size distributions

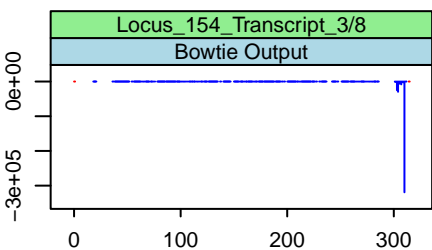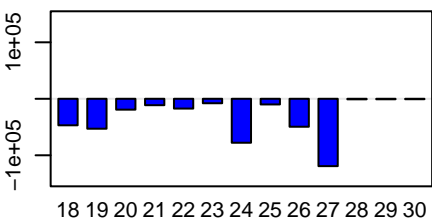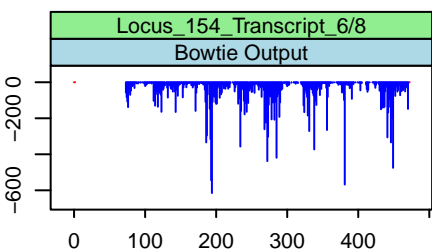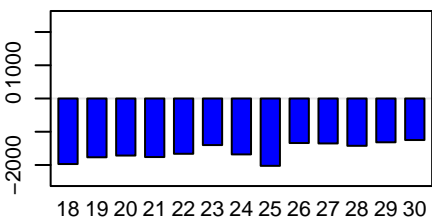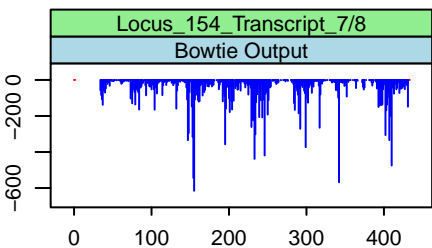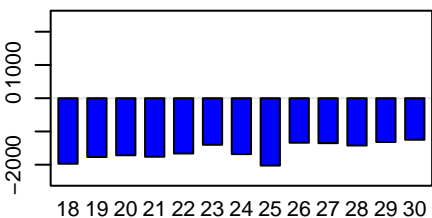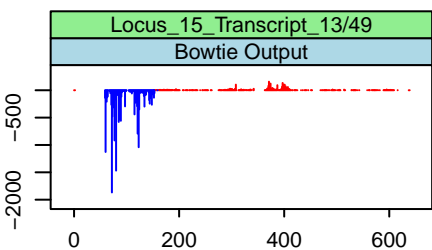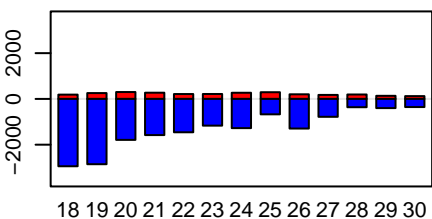

Coordinates/read size

Number of reads

# Readmaps and size distributions

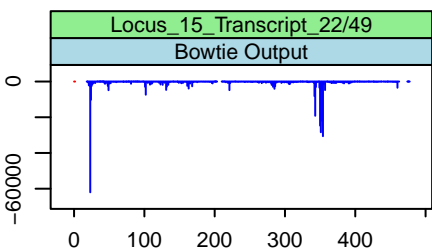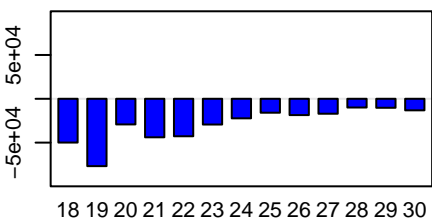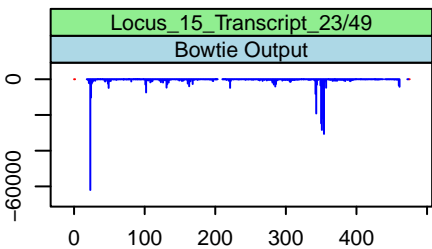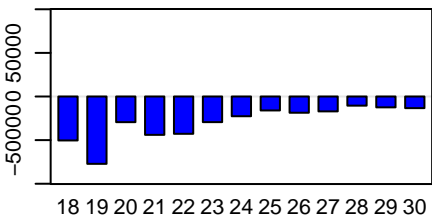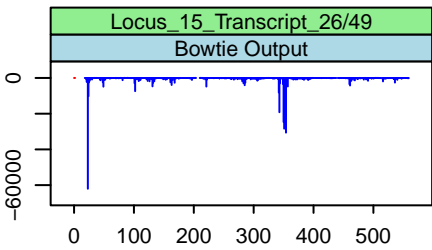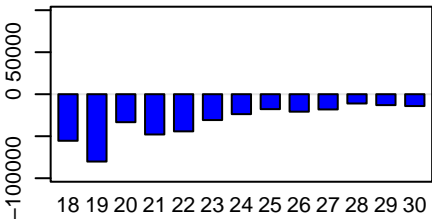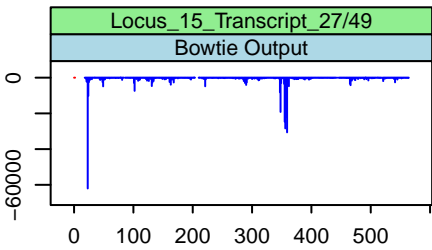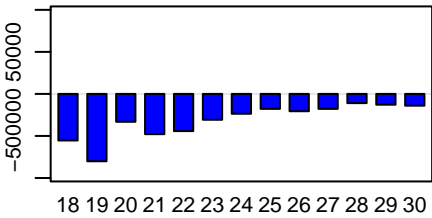

Coordinates/read size

Number of reads

# Readmaps and size distributions

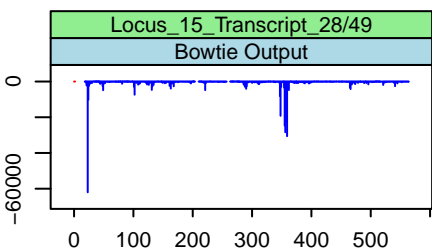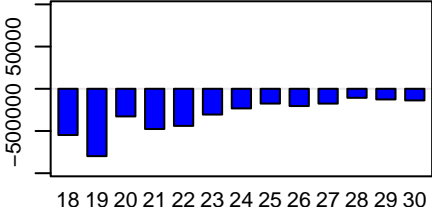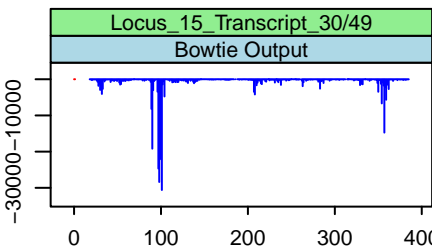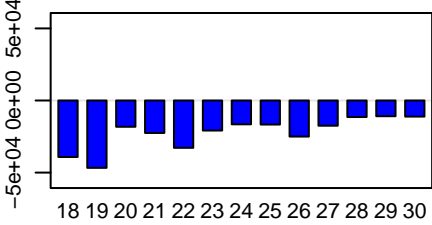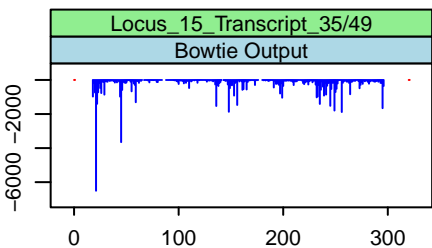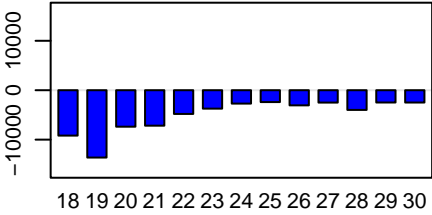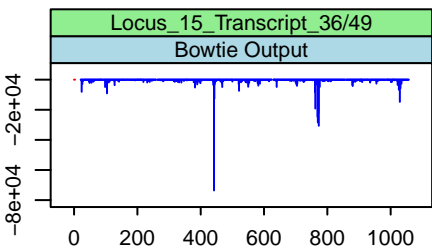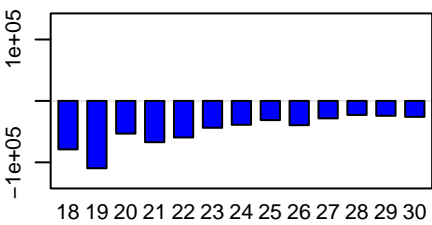

Number of reads

Coordinates/read size

# Readmaps and size distributions

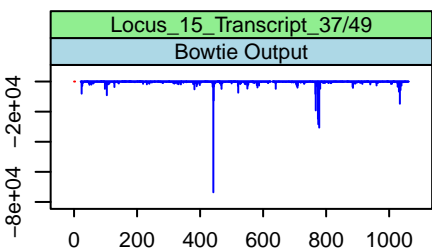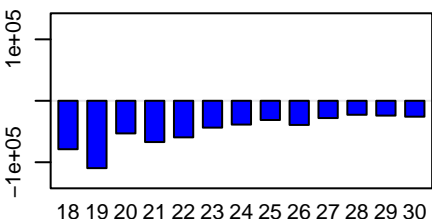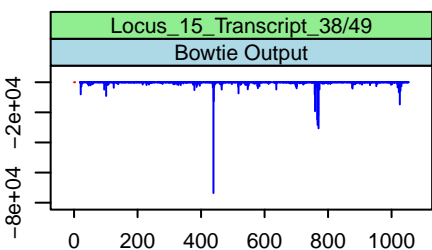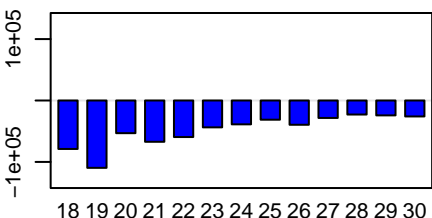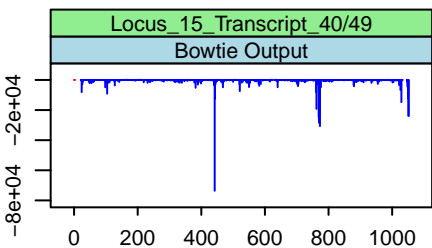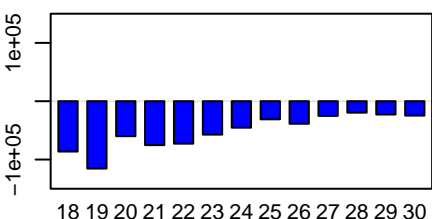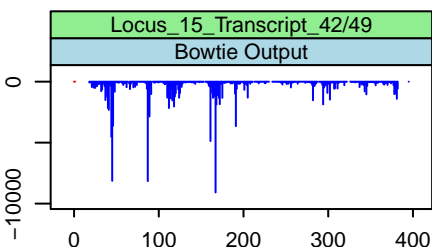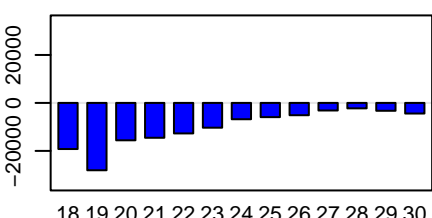

Coordinates/read size

Number of reads

# Readmaps and size distributions

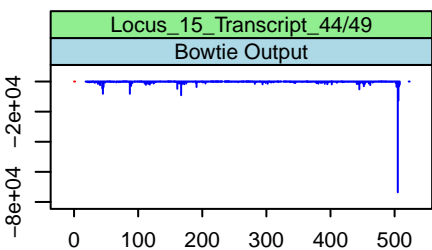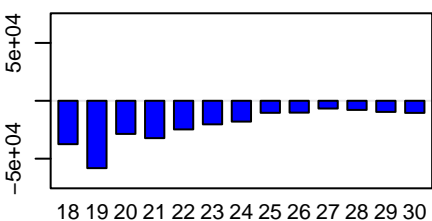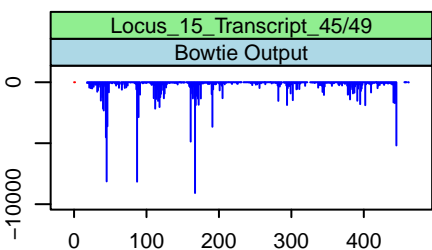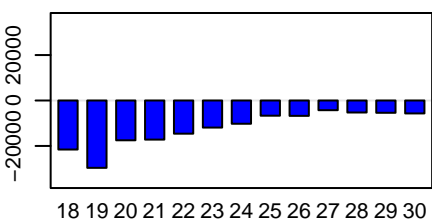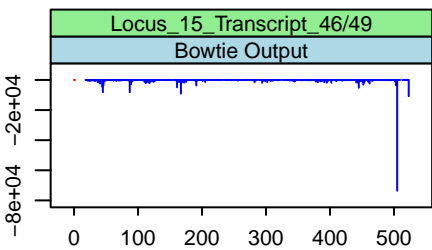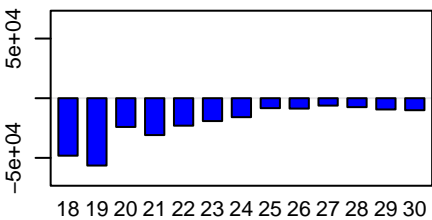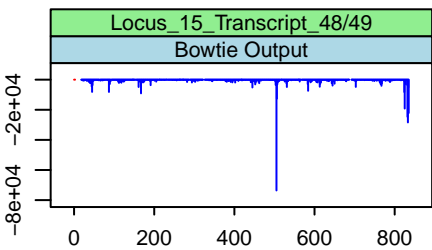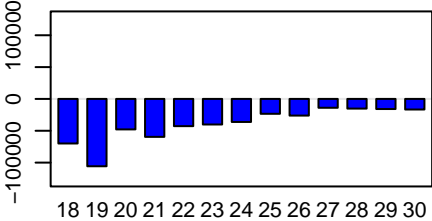

Coordinates/read size

Number of reads

# Readmaps and size distributions

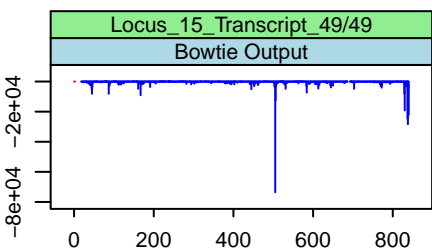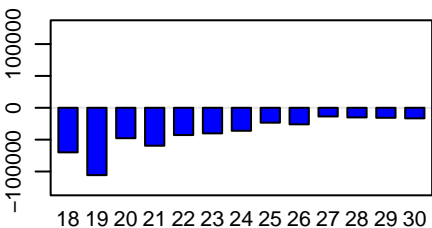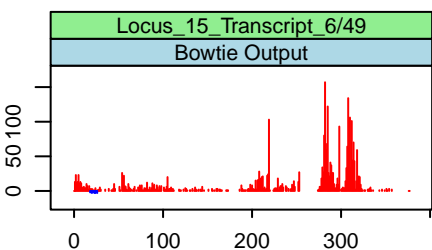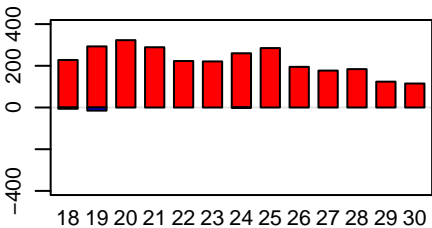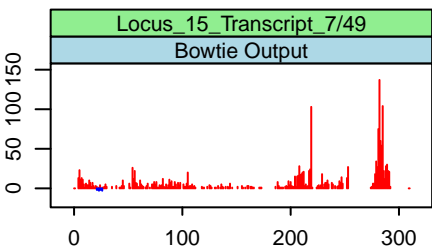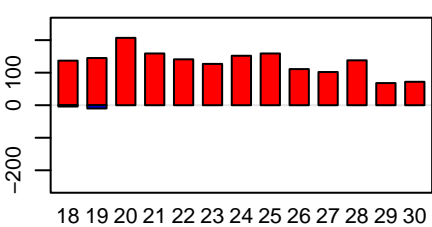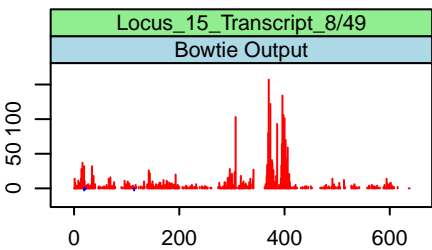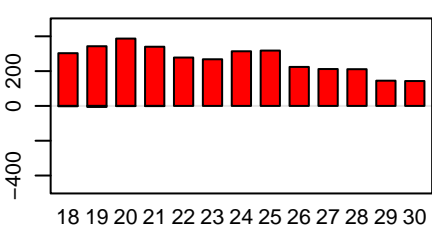

Coordinates/read size

Number of reads



# Readmaps and size distributions

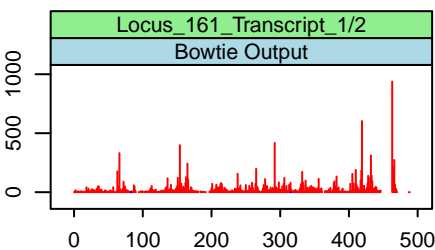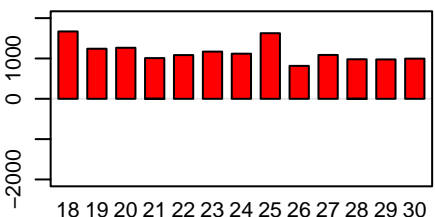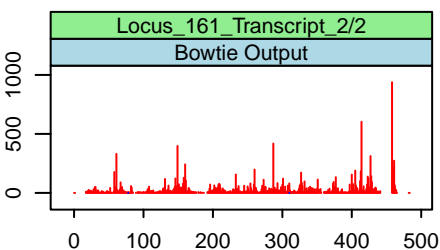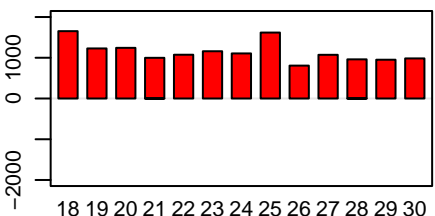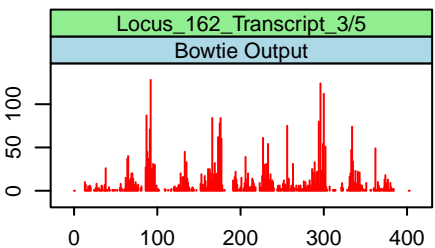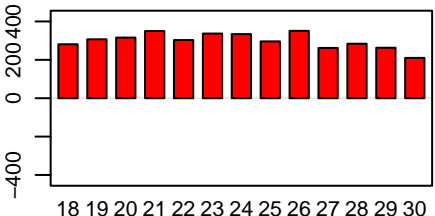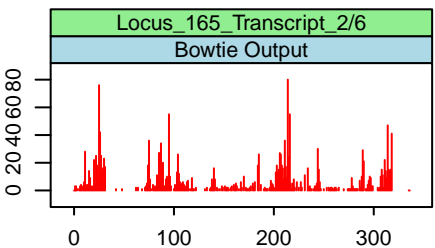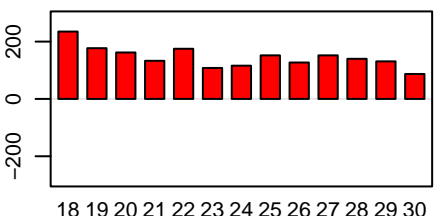

Coordinates/read size

# Readmaps and size distributions

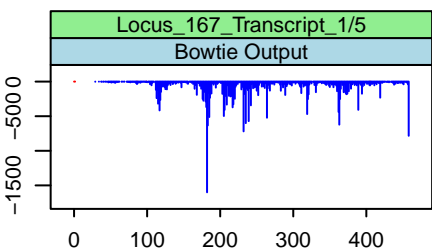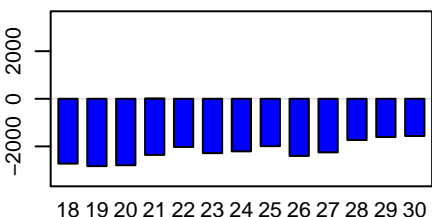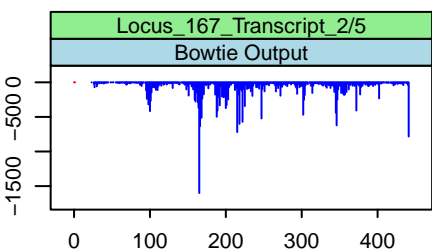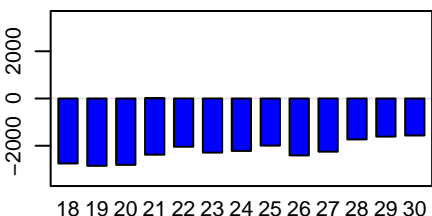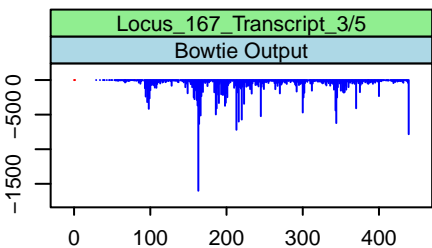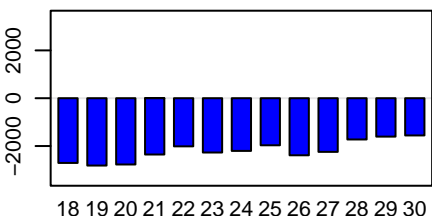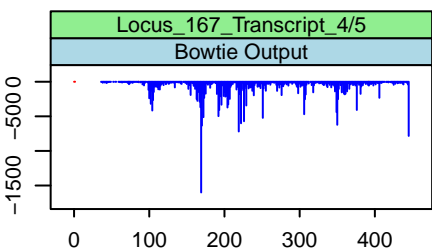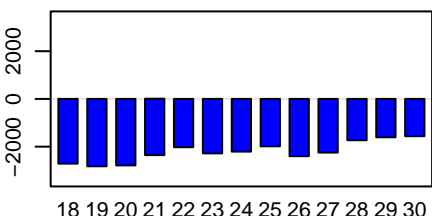

Coordinates/read size

Number of reads

# Readmaps and size distributions

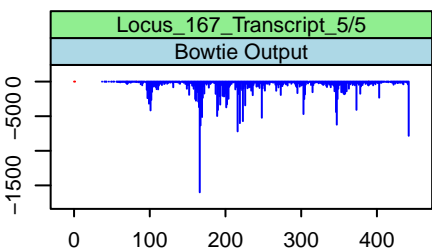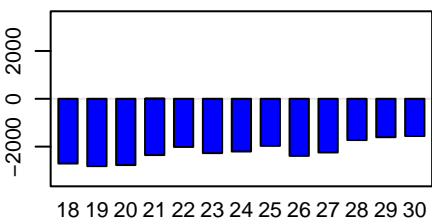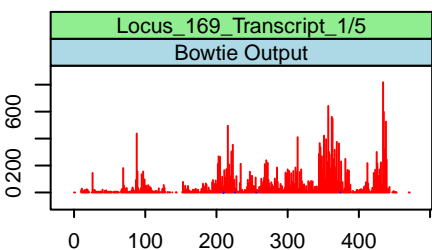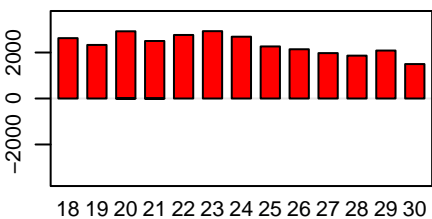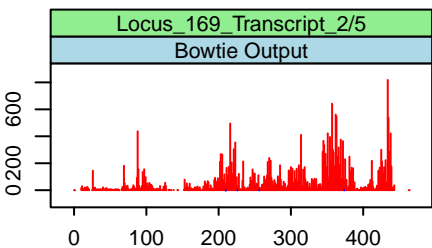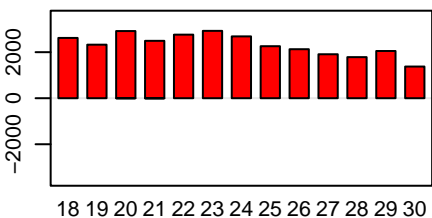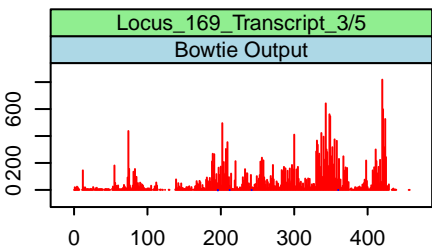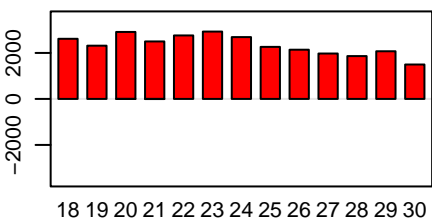

Coordinates/read size

# Readmaps and size distributions

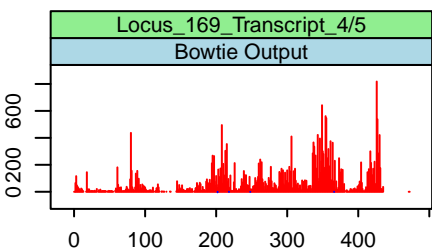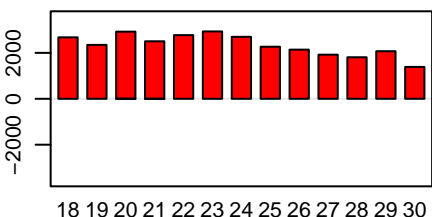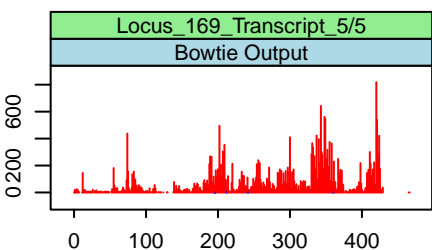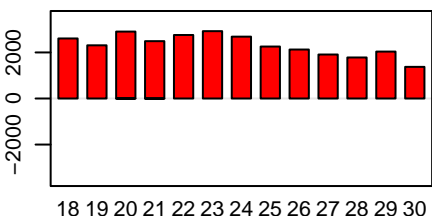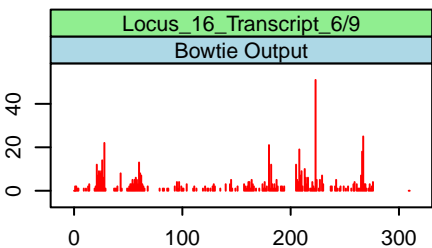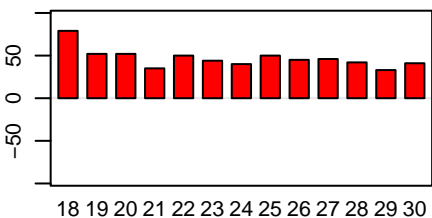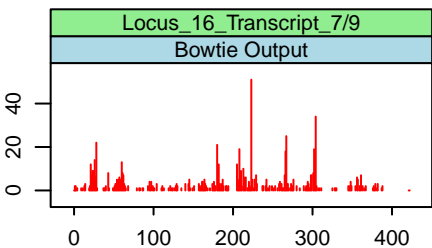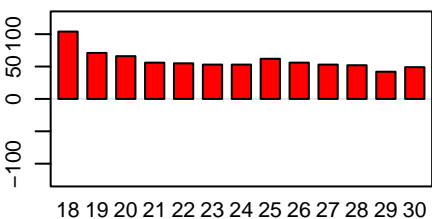

Coordinates/read size

# Readmaps and size distributions

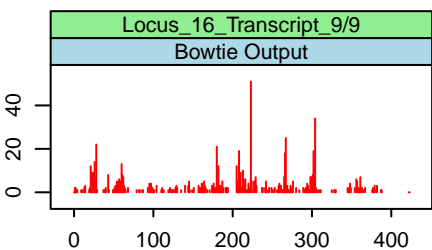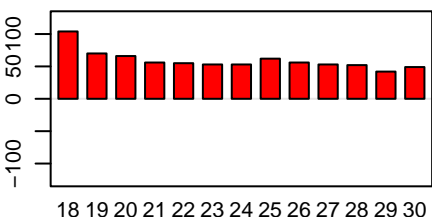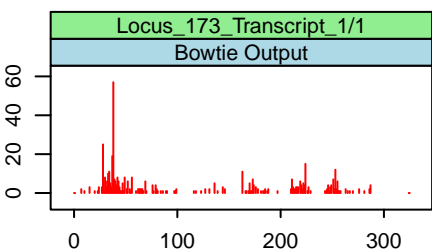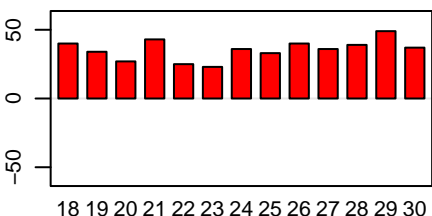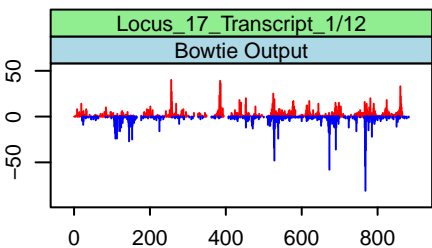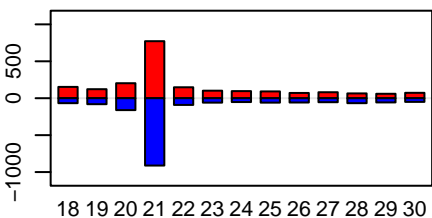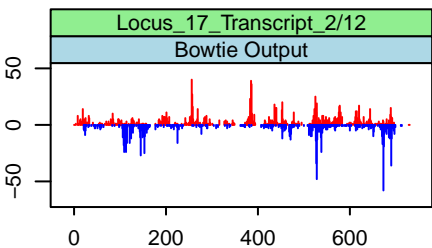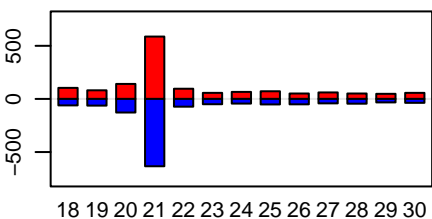

Coordinates/read size

Number of reads

# Readmaps and size distributions

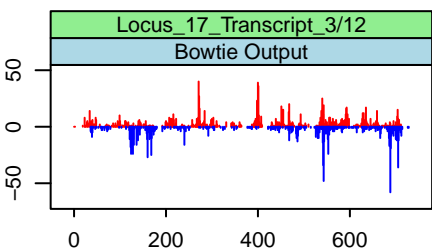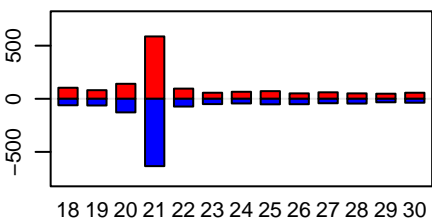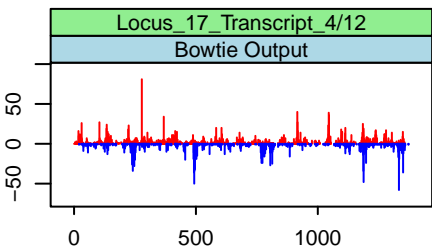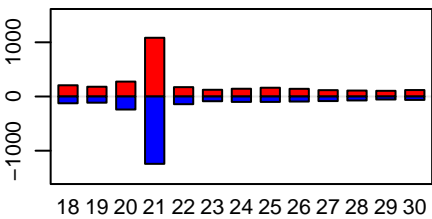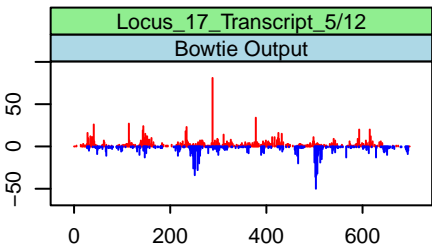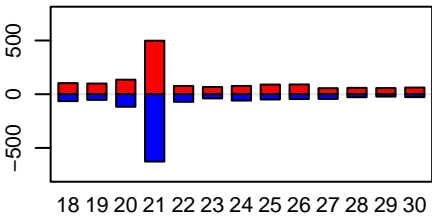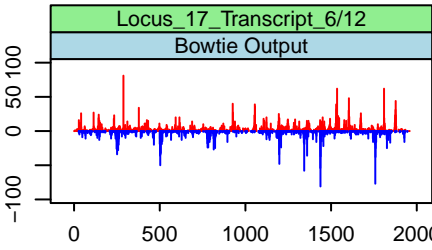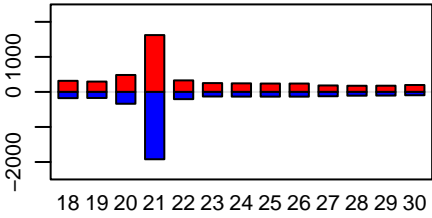

Coordinates/read size

Number of reads

# Readmaps and size distributions

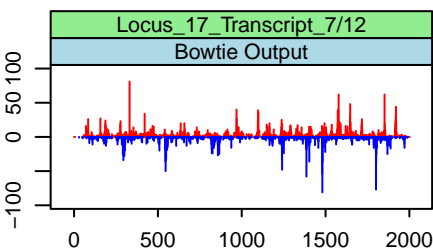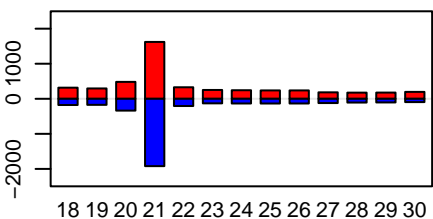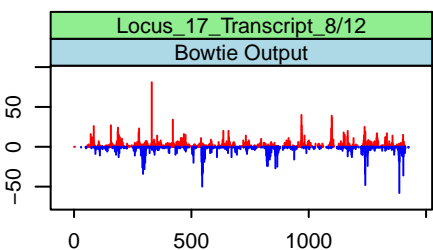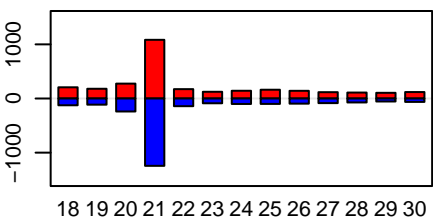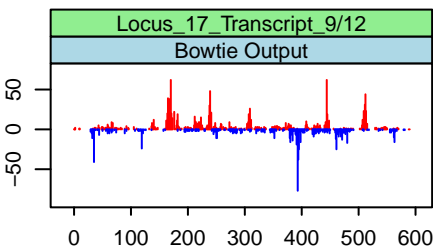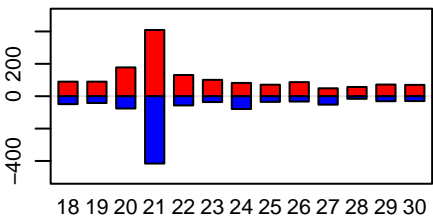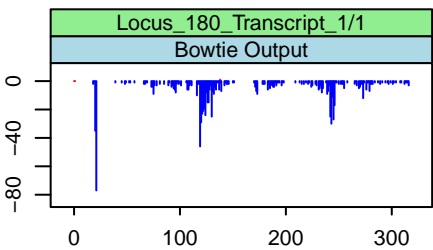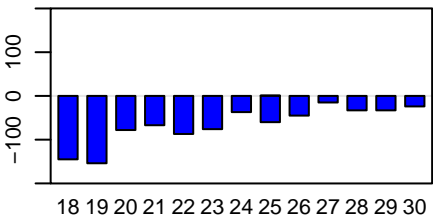

Coordinates/read size

Number of reads

# Readmaps and size distributions

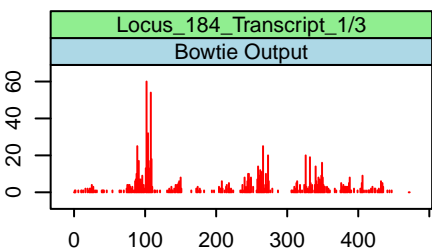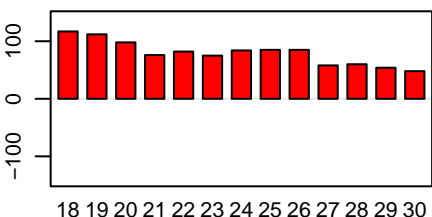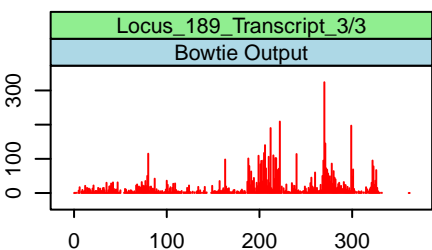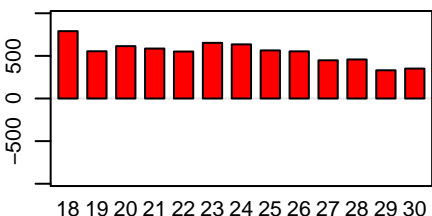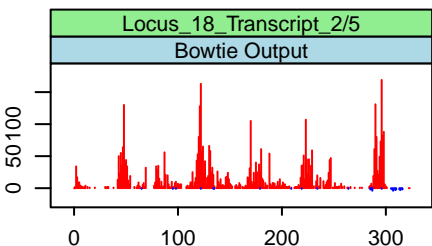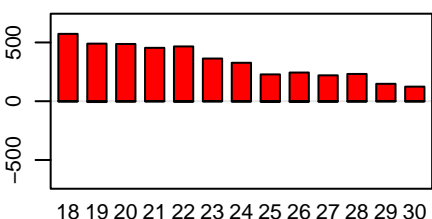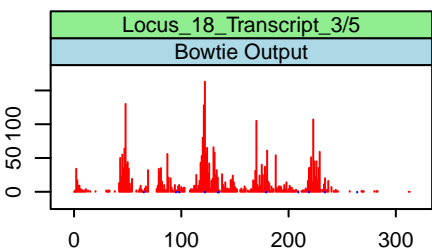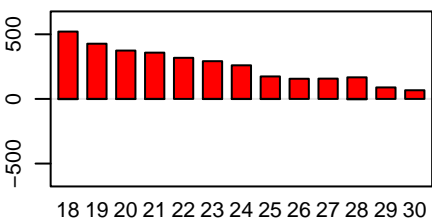

Coordinates/read size



# Readmaps and size distributions

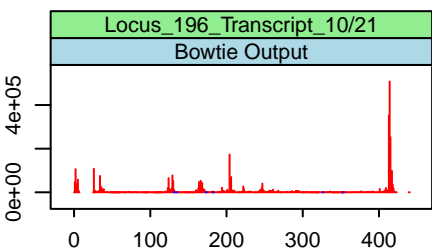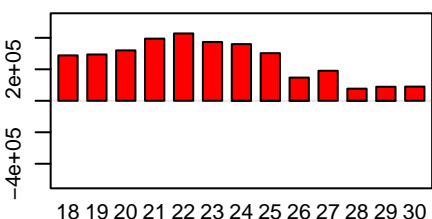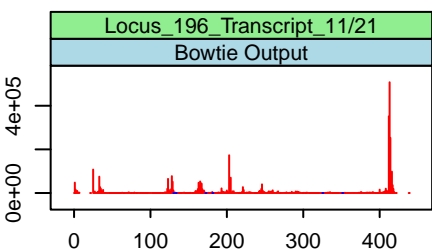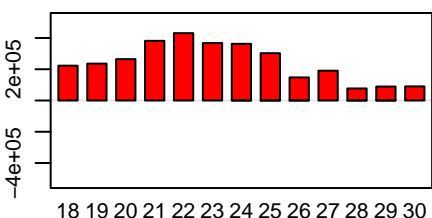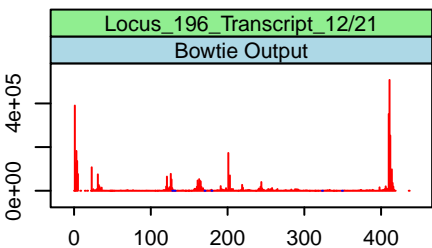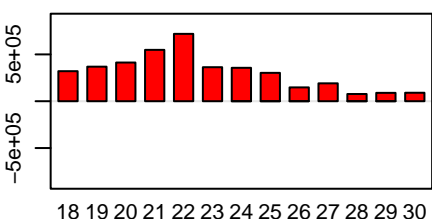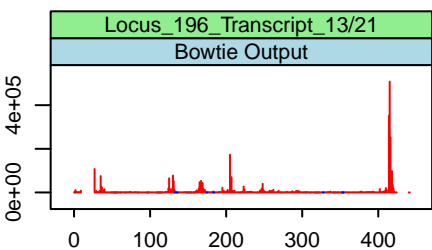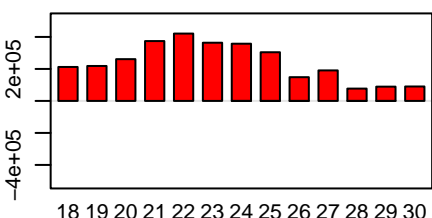

Coordinates/read size

Number of reads

# Readmaps and size distributions

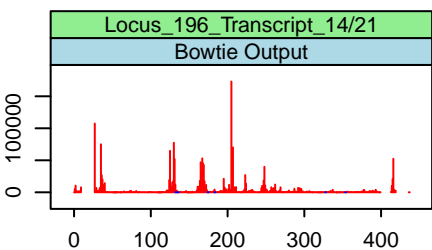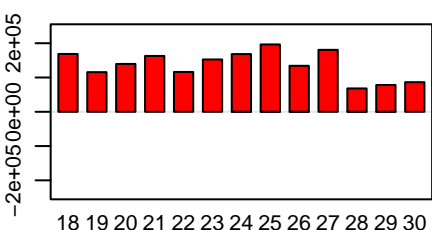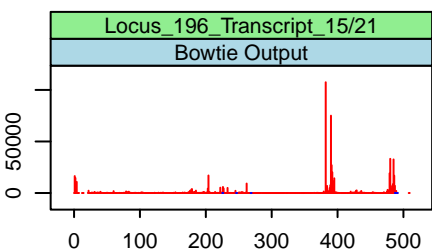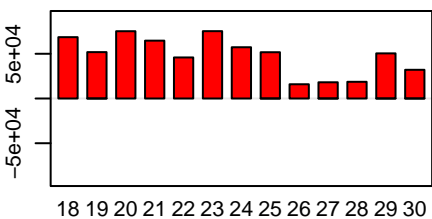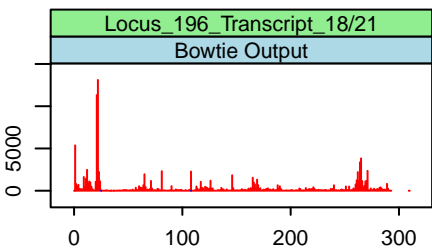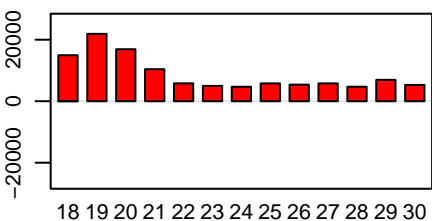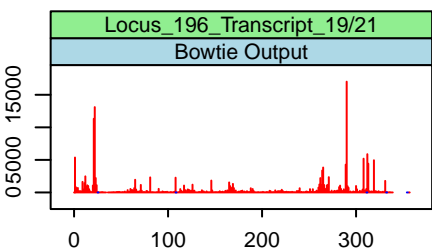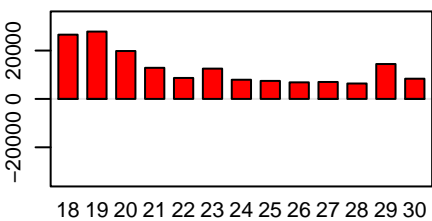

Coordinates/read size

# Readmaps and size distributions

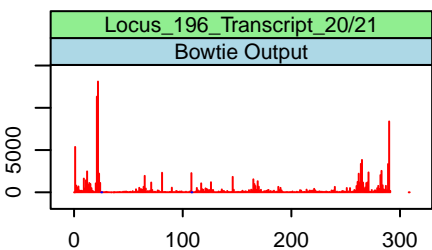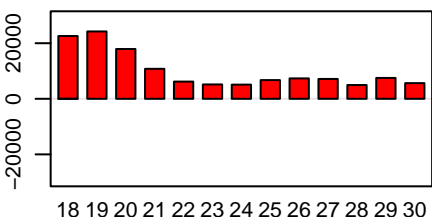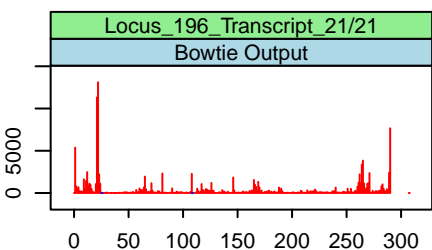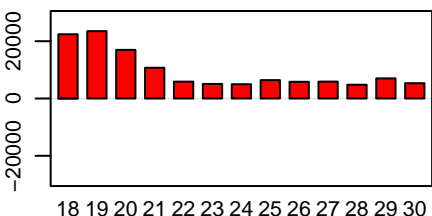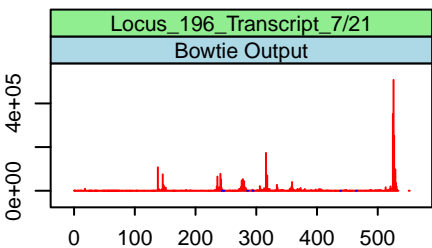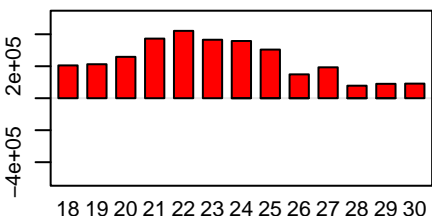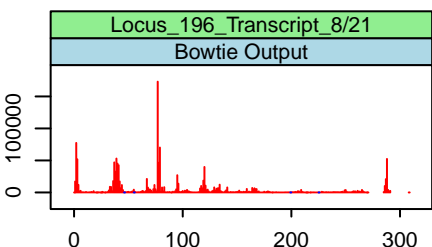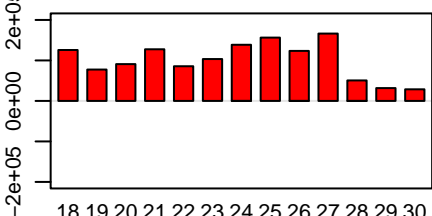

Coordinates/read size

Number of reads

# Readmaps and size distributions

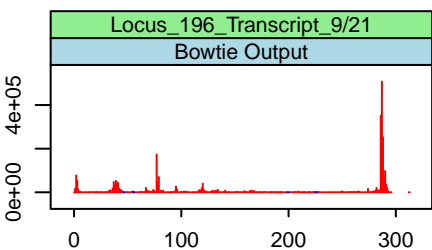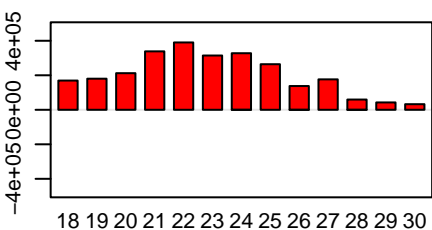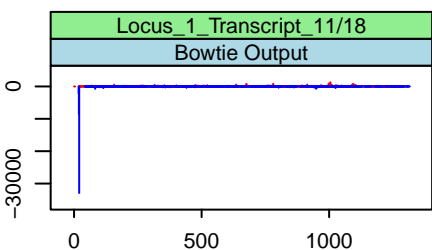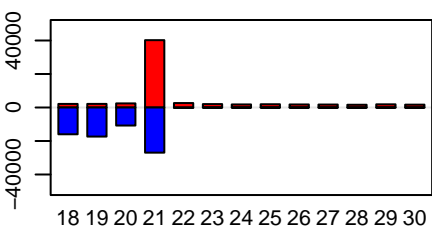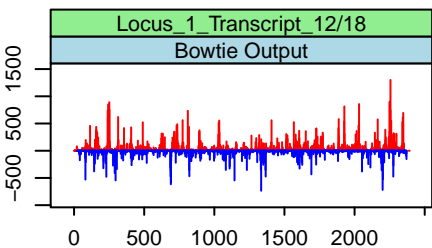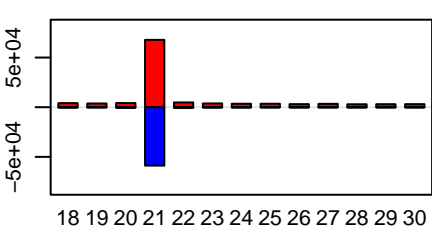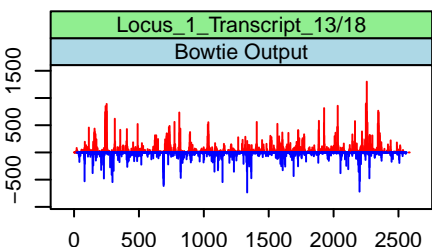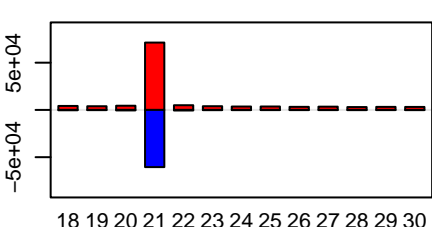

Coordinates/read size

# Readmaps and size distributions

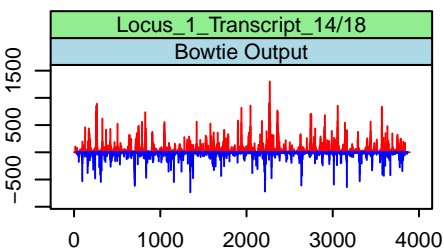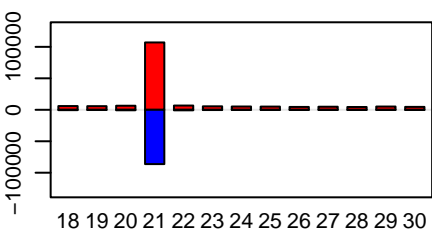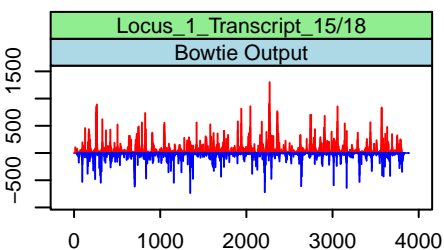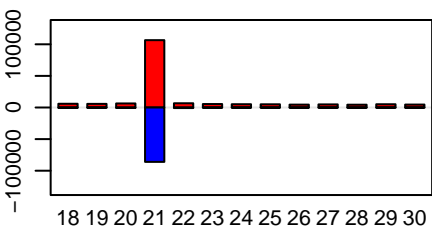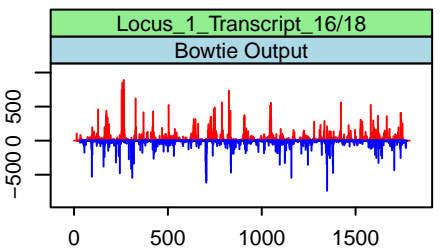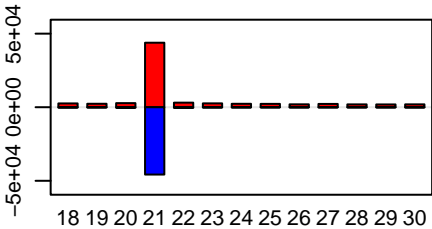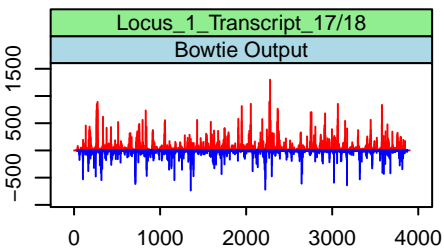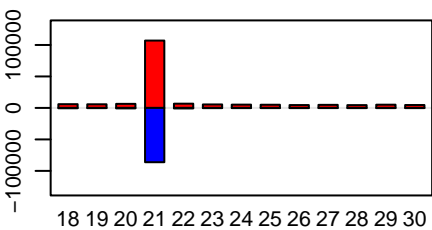

Coordinates/read size

# Readmaps and size distributions

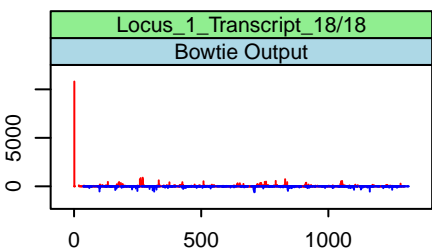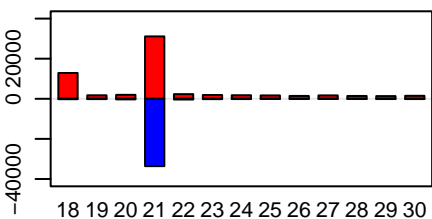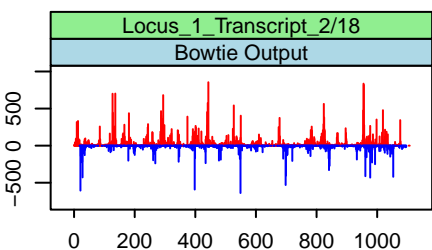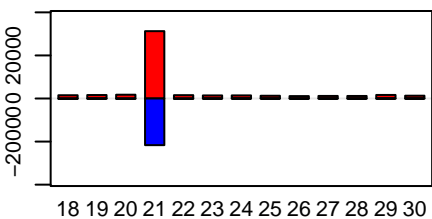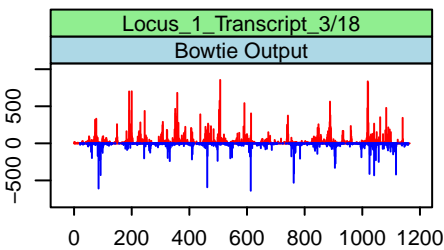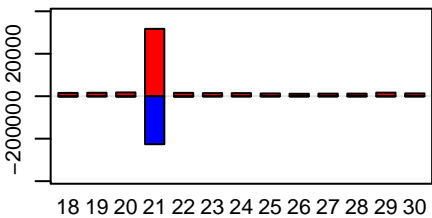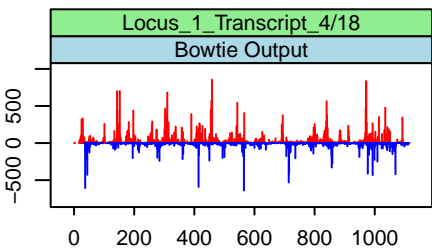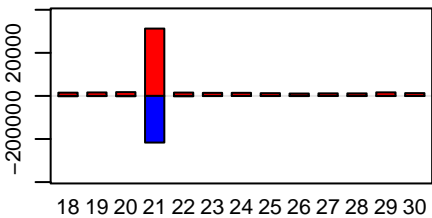

Coordinates/read size

# Readmaps and size distributions

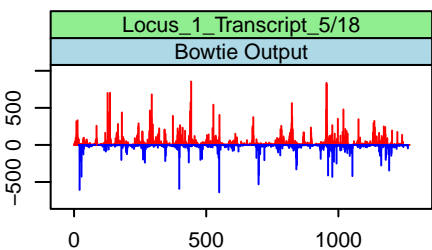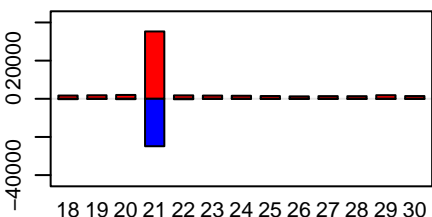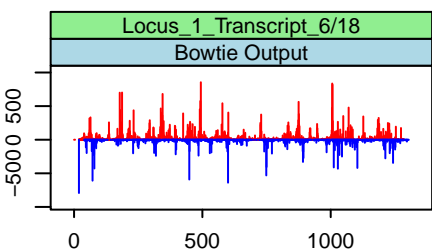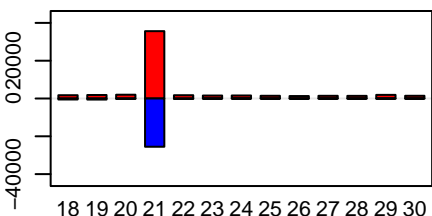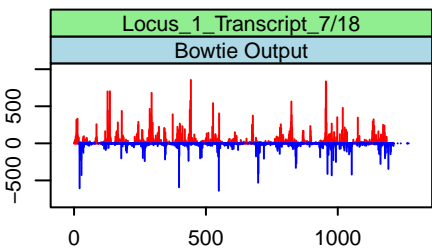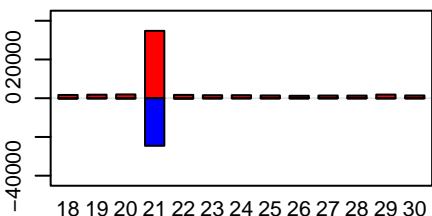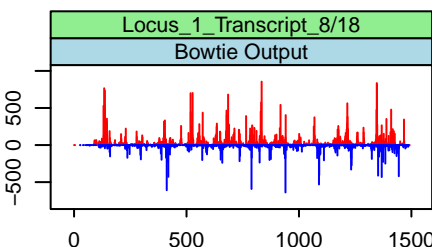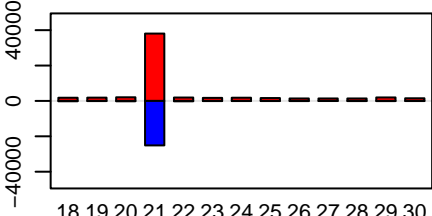

Coordinates/read size

Number of reads

# Readmaps and size distributions

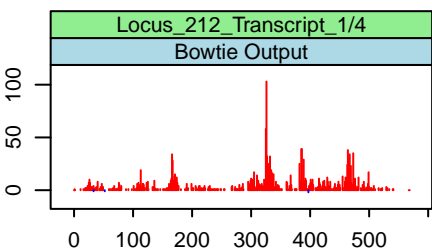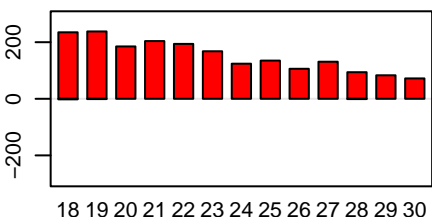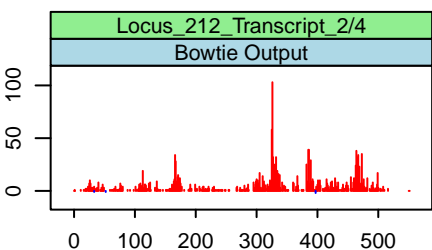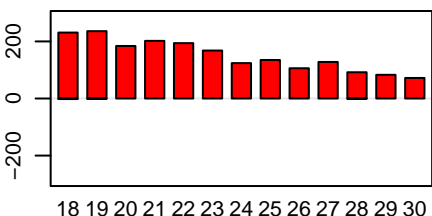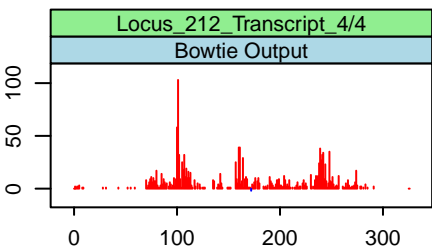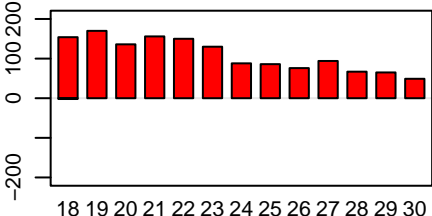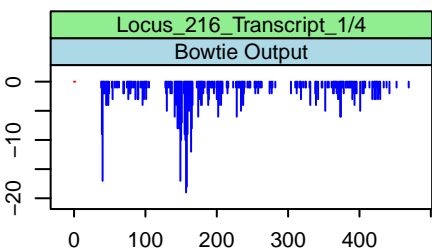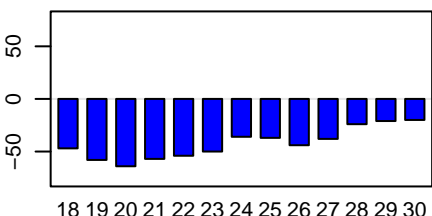

Coordinates/read size



# Readmaps and size distributions

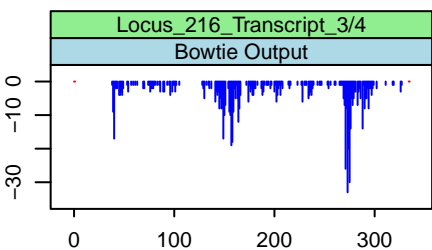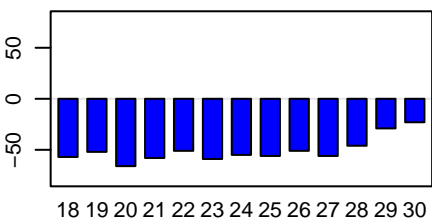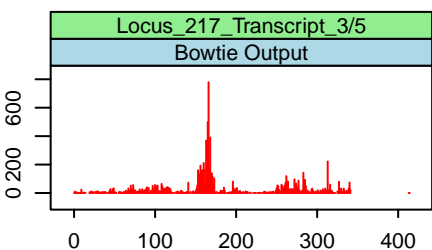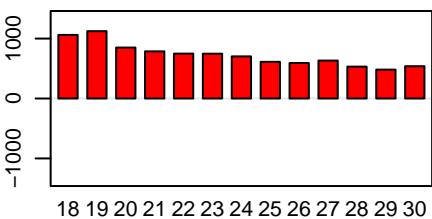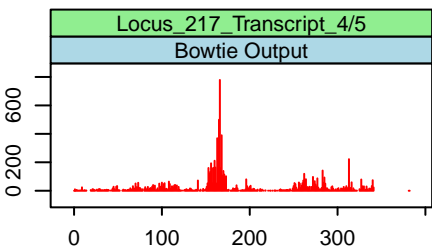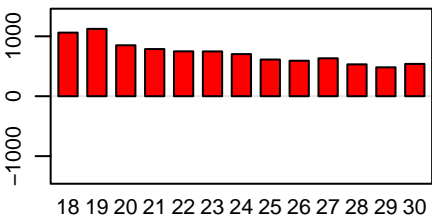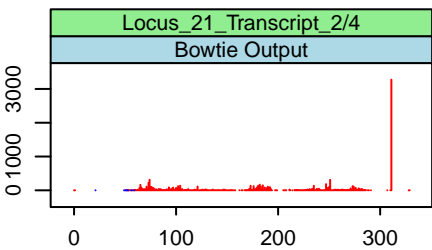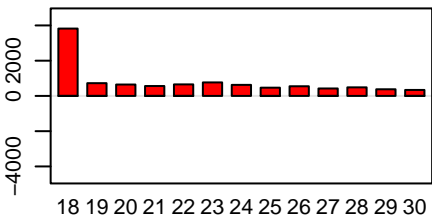

Coordinates/read size

Number of reads

# Readmaps and size distributions

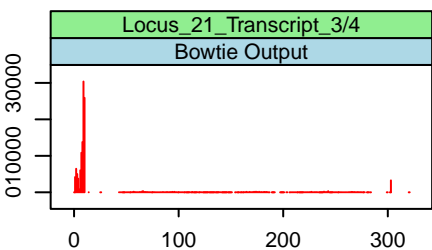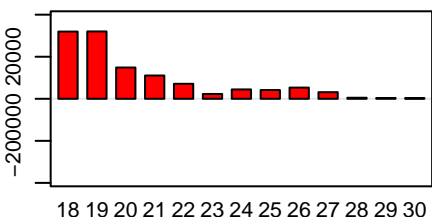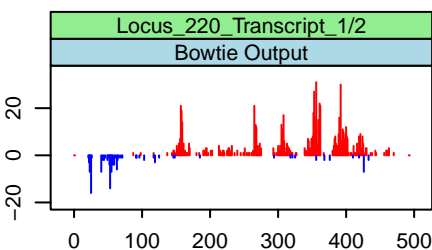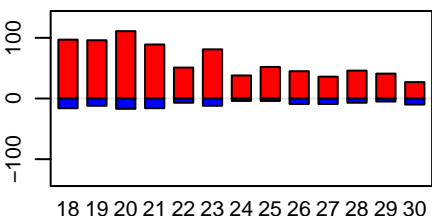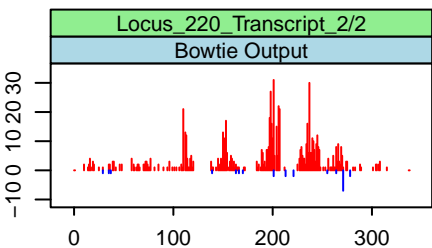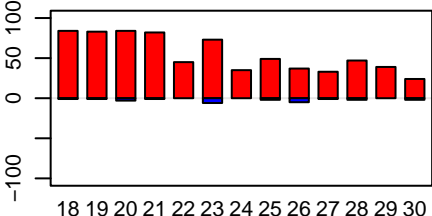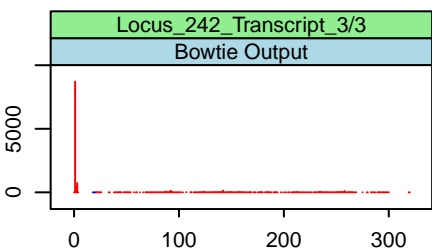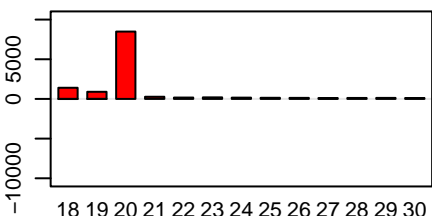

Coordinates/read size

# Readmaps and size distributions

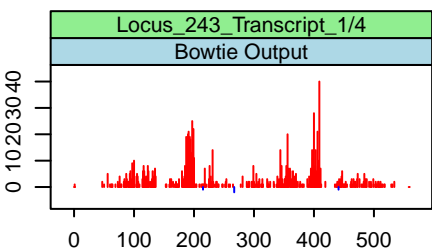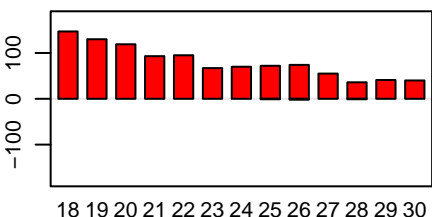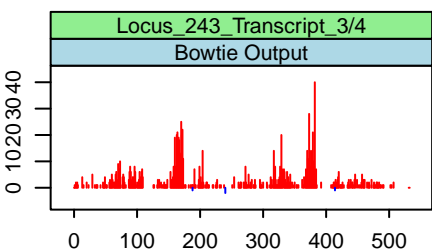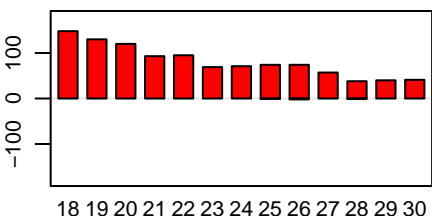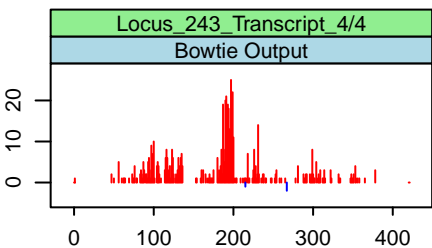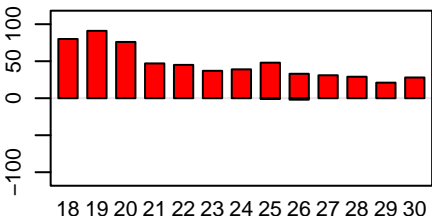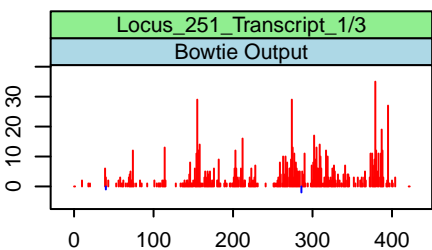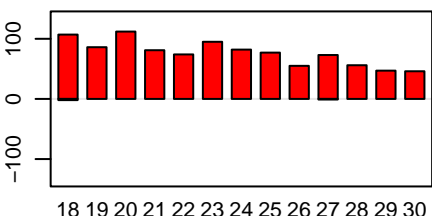

Coordinates/read size

# Readmaps and size distributions

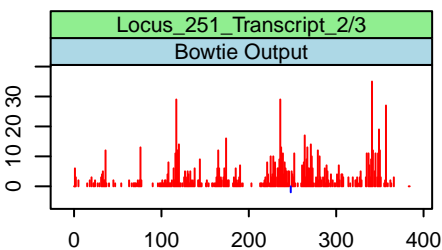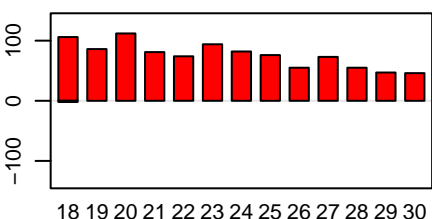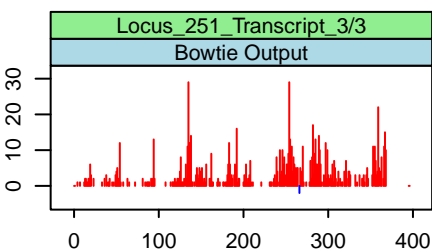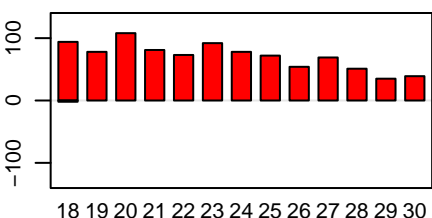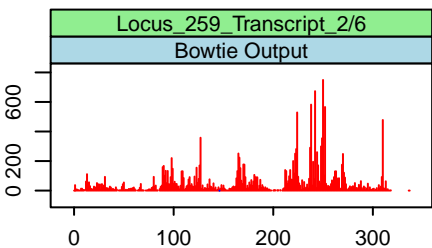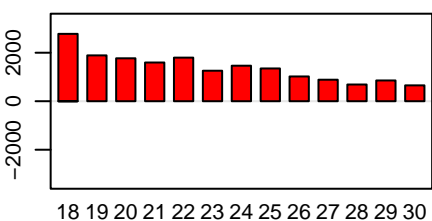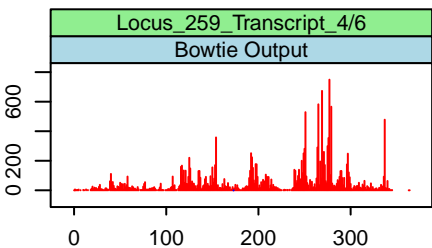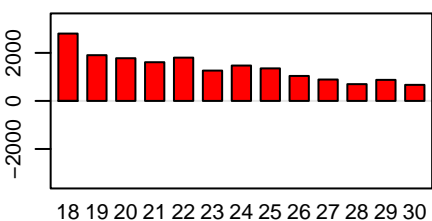

Coordinates/read size

# Readmaps and size distributions

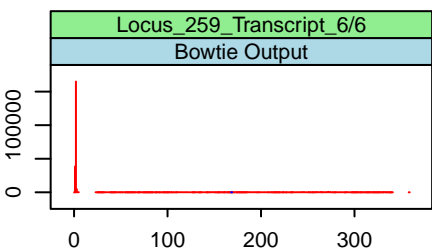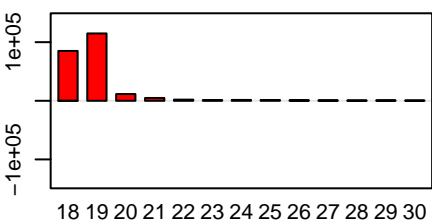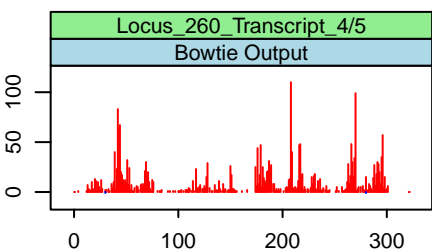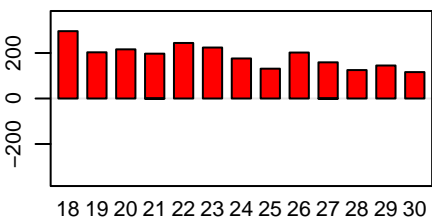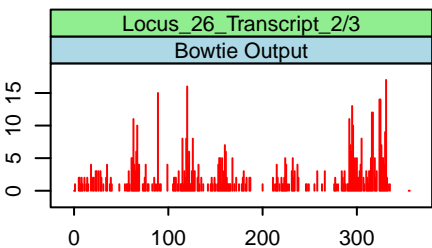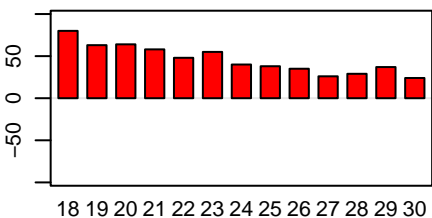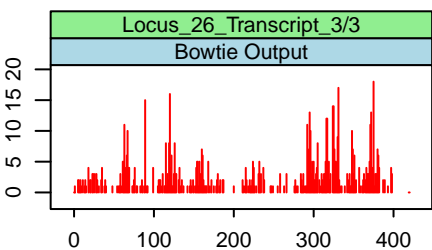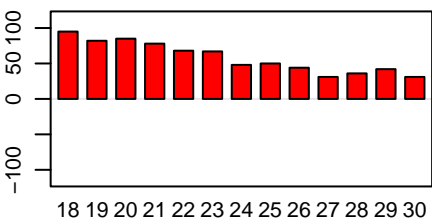

Coordinates/read size

Number of reads

# Readmaps and size distributions

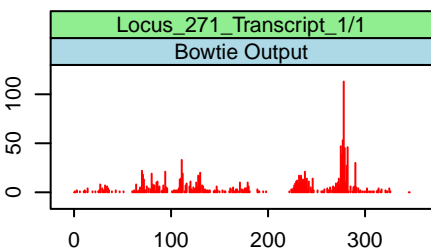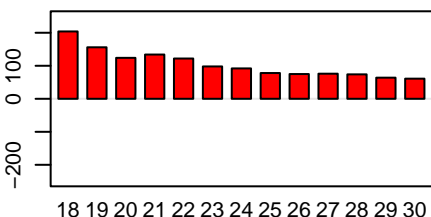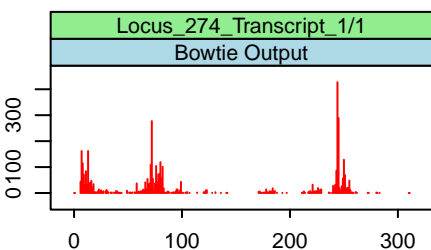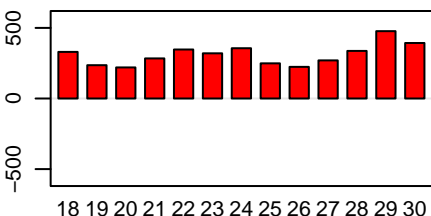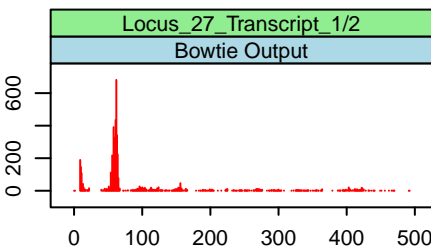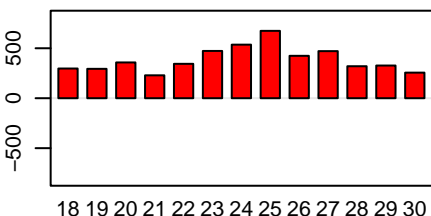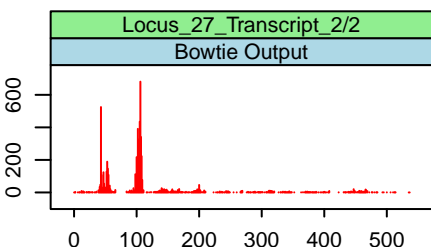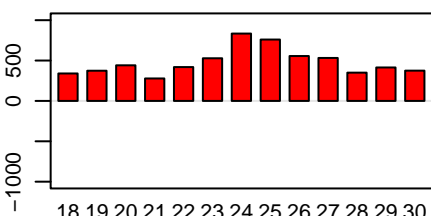

Coordinates/read size

# Readmaps and size distributions

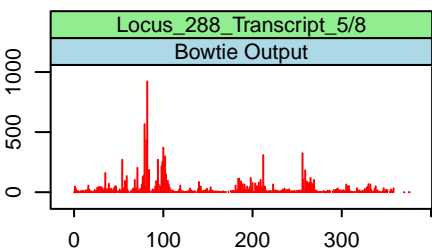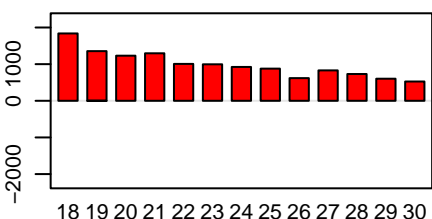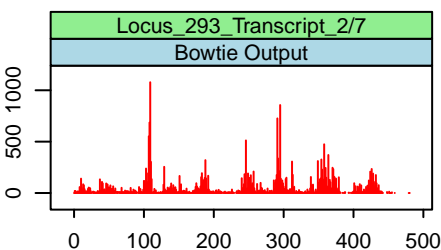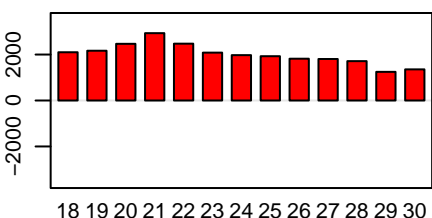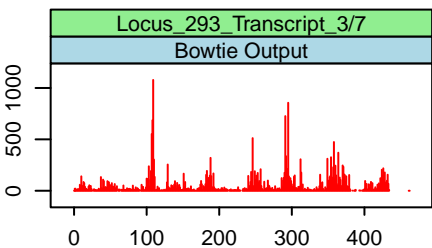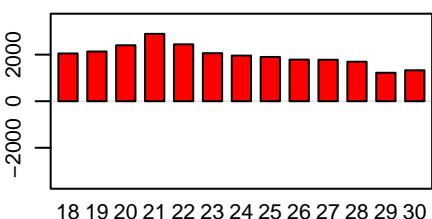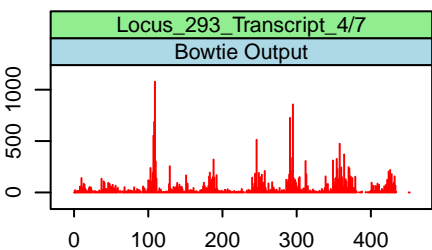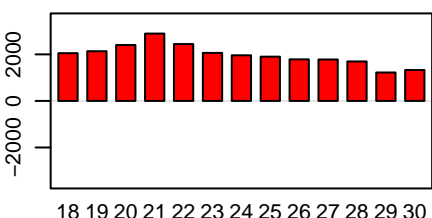

Coordinates/read size

# Readmaps and size distributions

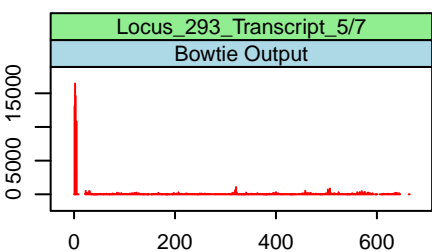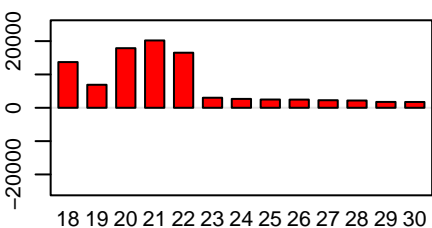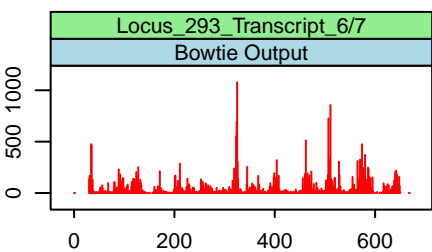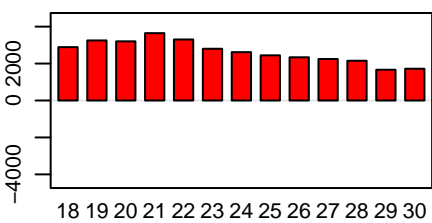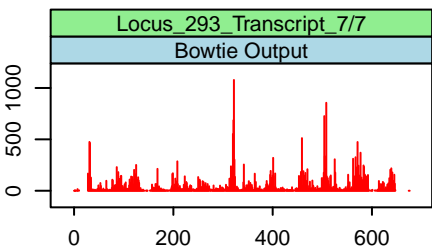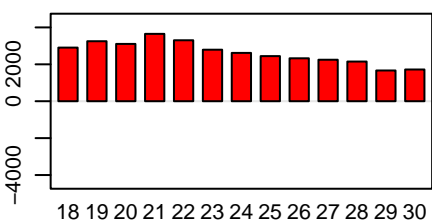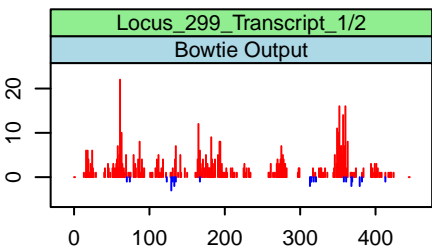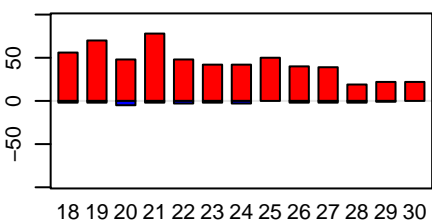

Coordinates/read size



# Readmaps and size distributions

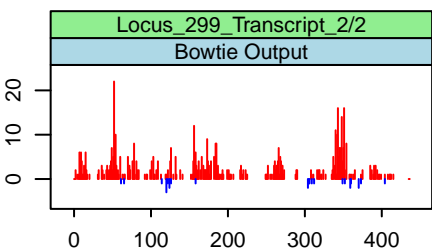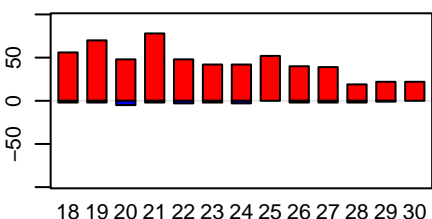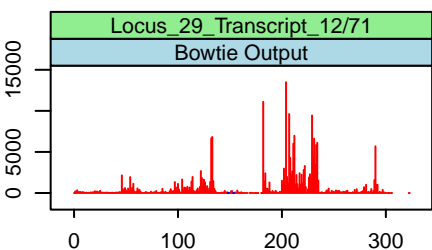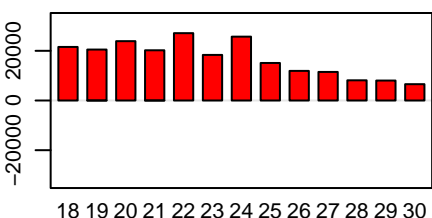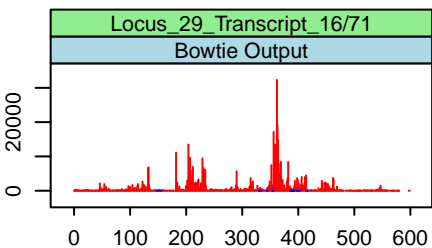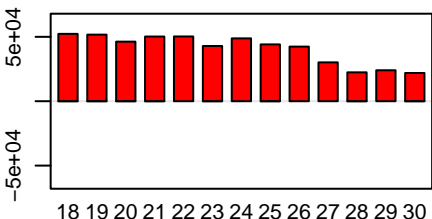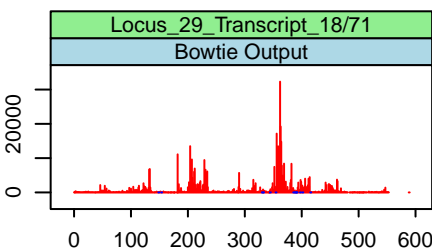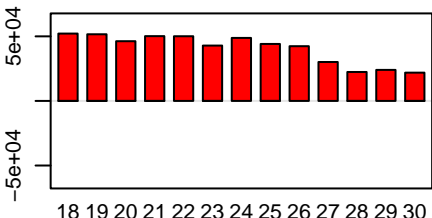

Coordinates/read size

# Readmaps and size distributions

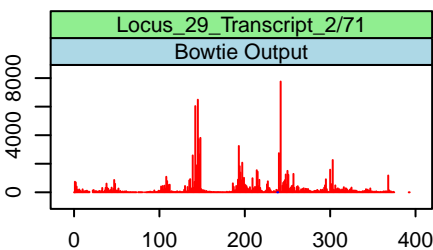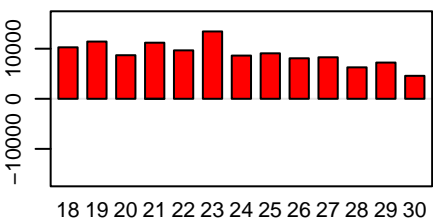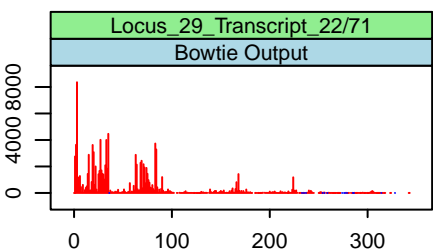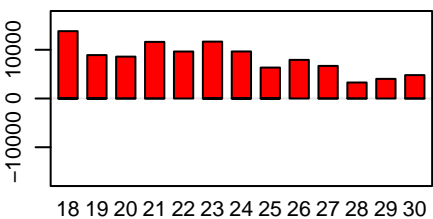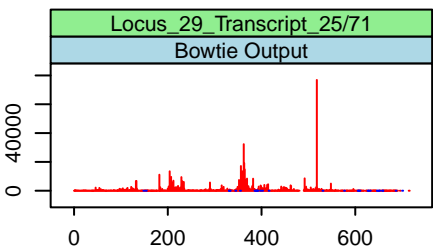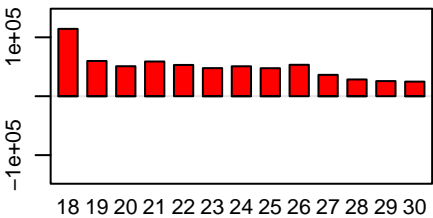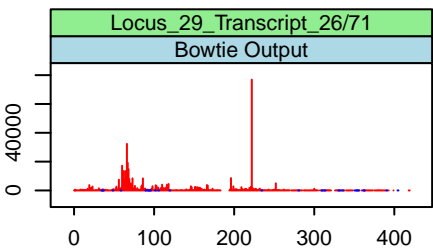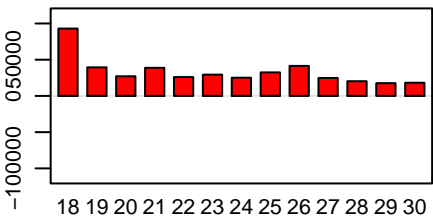

Coordinates/read size

# Readmaps and size distributions

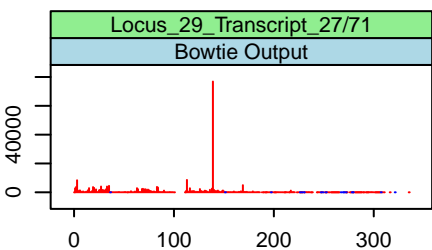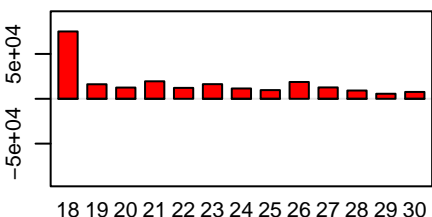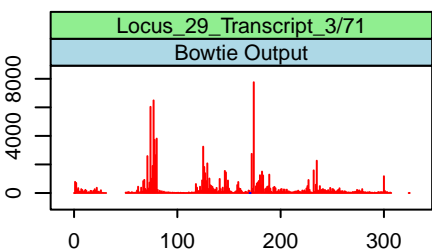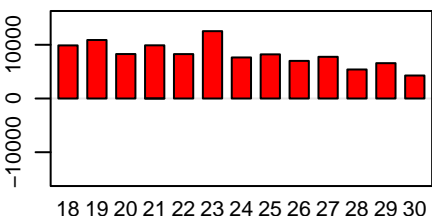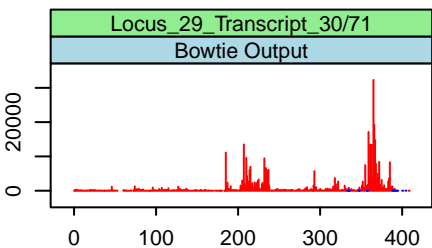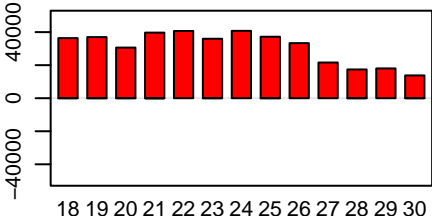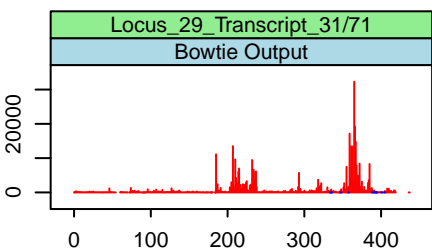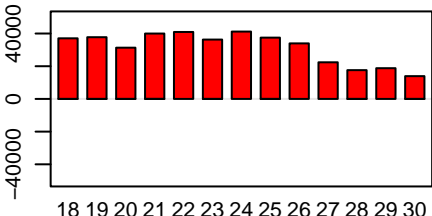

Coordinates/read size

# Readmaps and size distributions

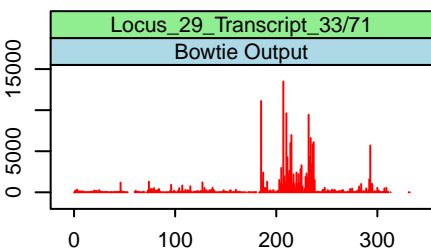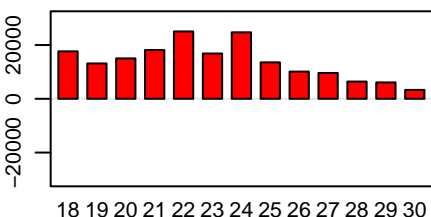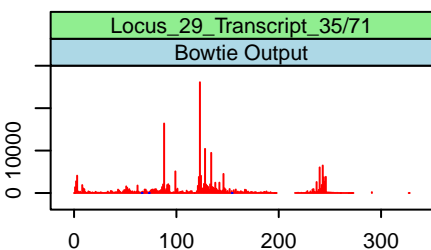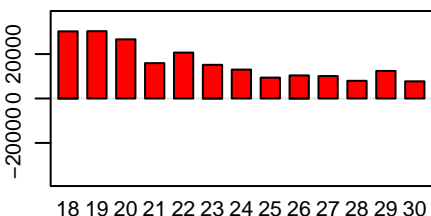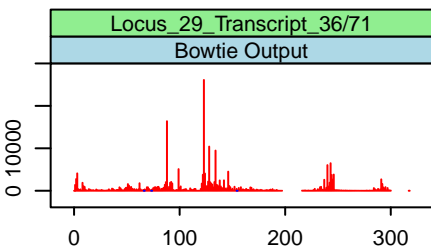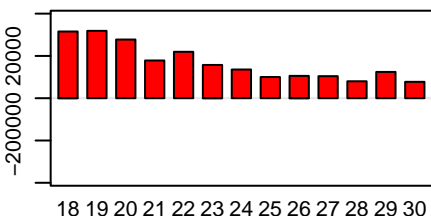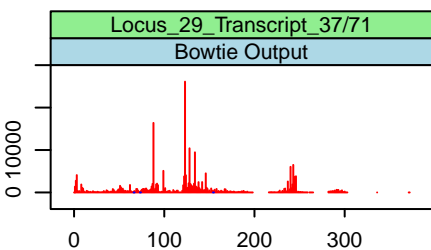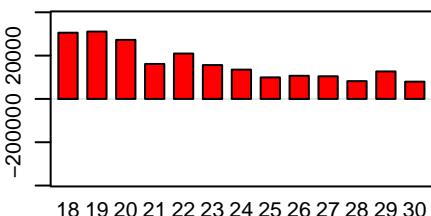

Coordinates/read size

# Readmaps and size distributions

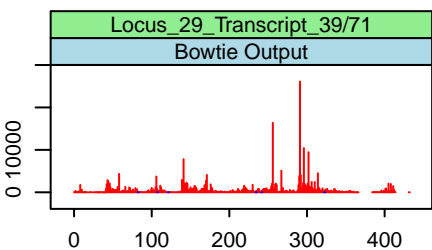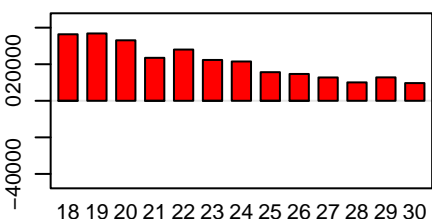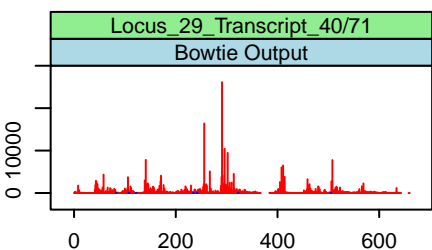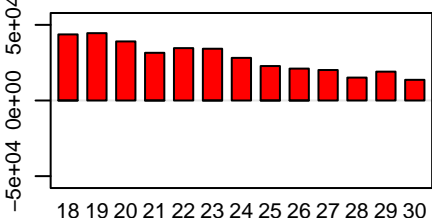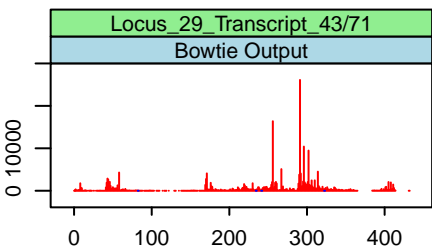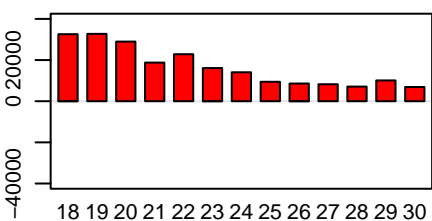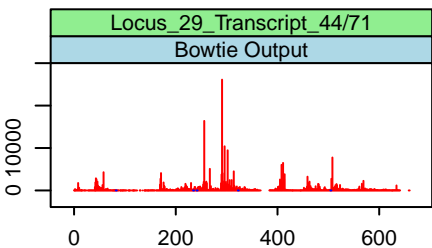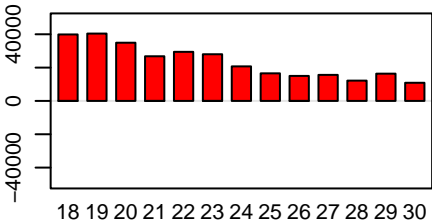

Coordinates/read size

# Readmaps and size distributions

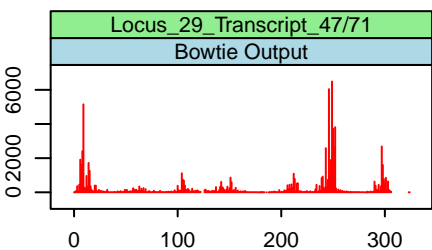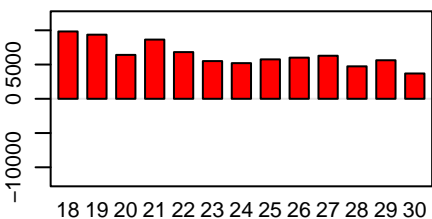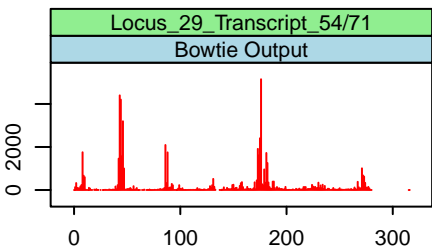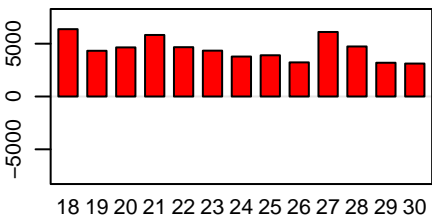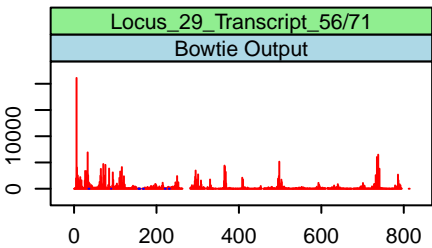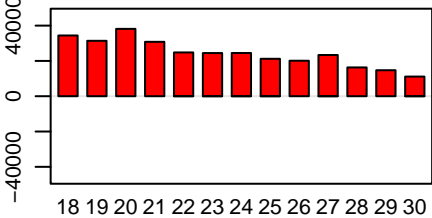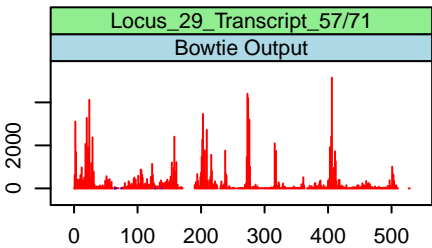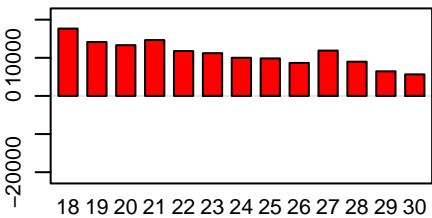

Coordinates/read size

# Readmaps and size distributions

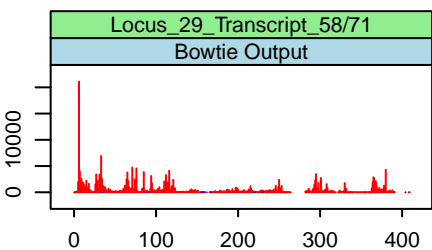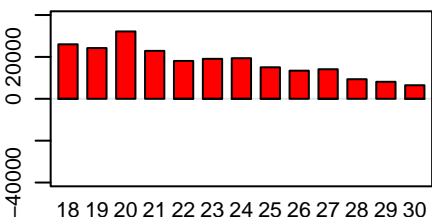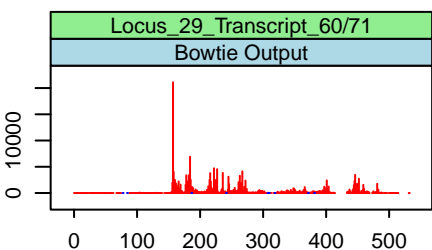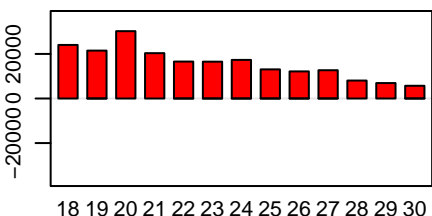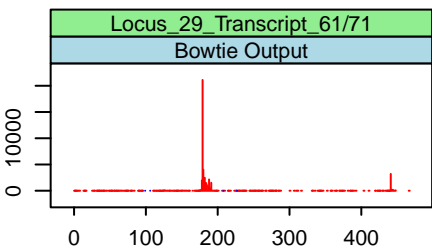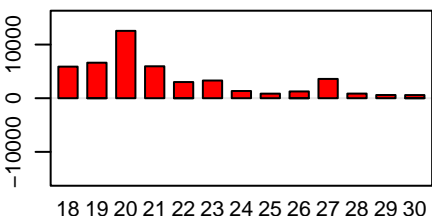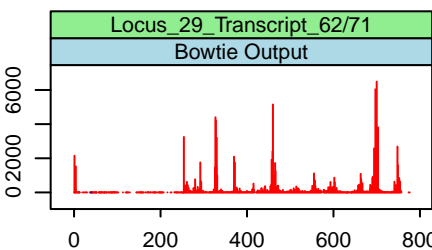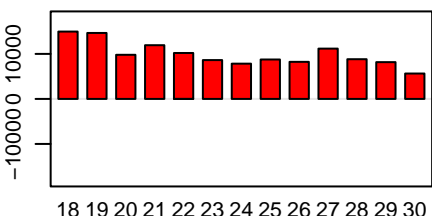

Coordinates/read size

Number of reads

# Readmaps and size distributions

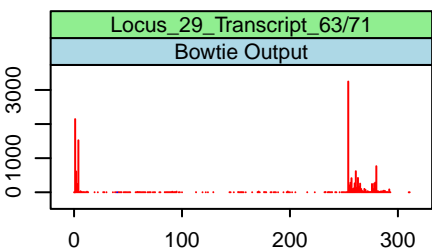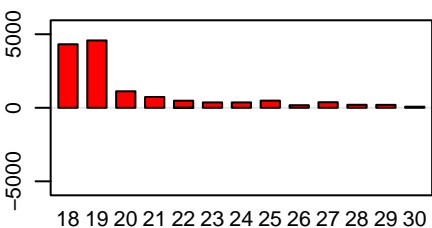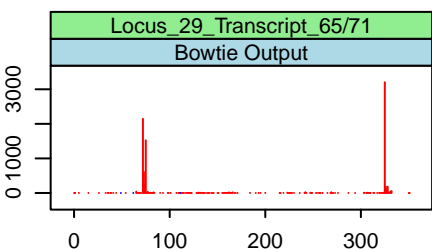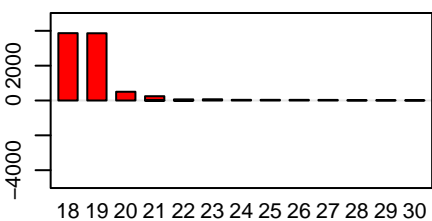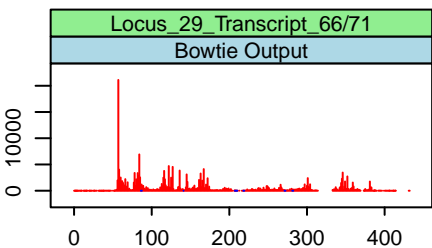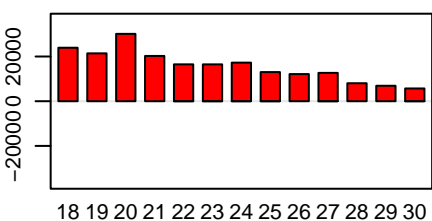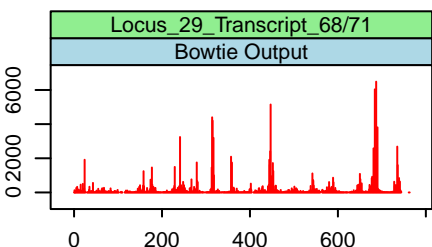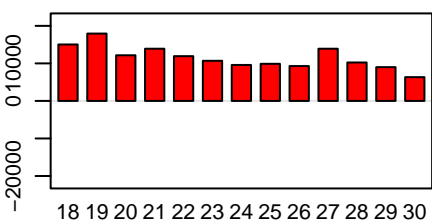

Coordinates/read size

Number of reads



# Readmaps and size distributions

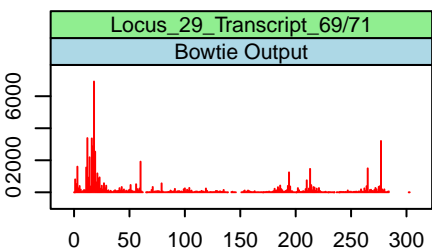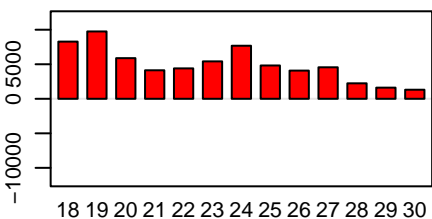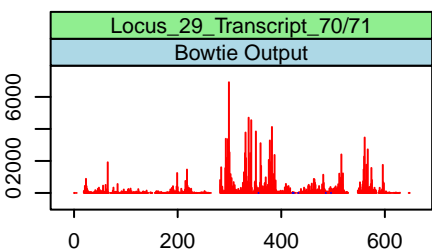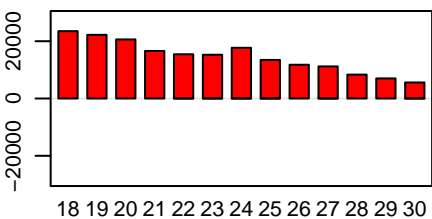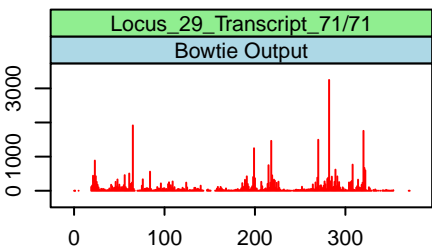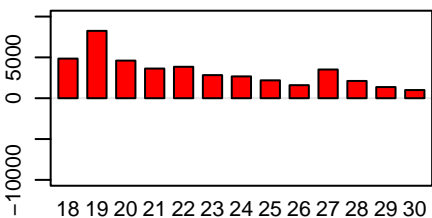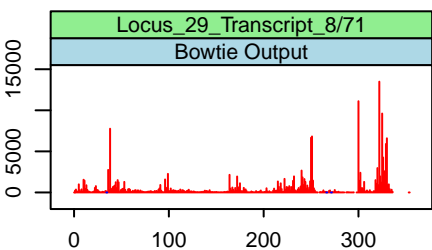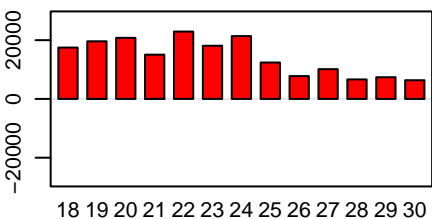

Coordinates/read size

# Readmaps and size distributions

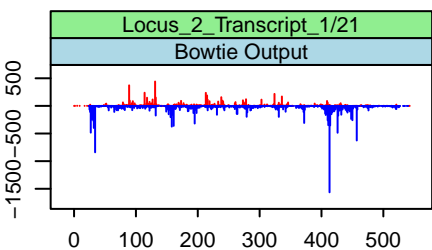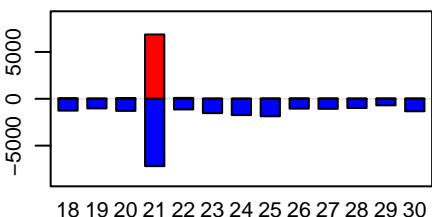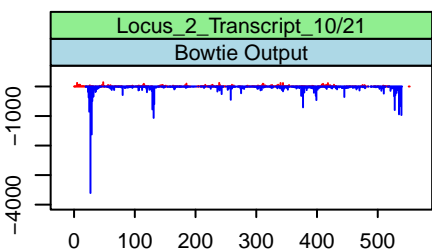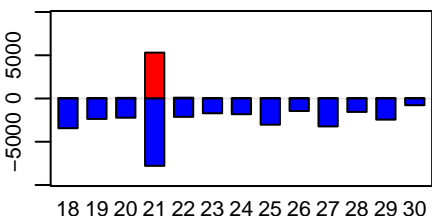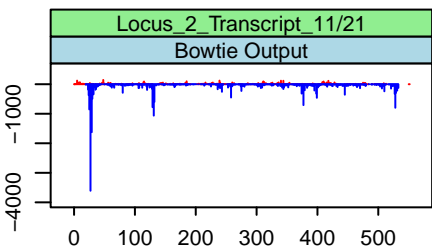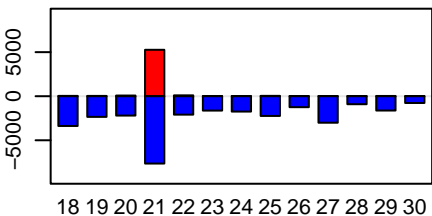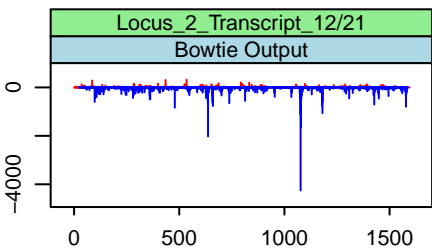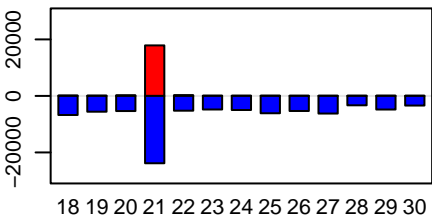

Coordinates/read size

Number of reads

# Readmaps and size distributions

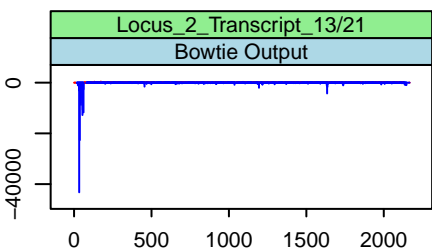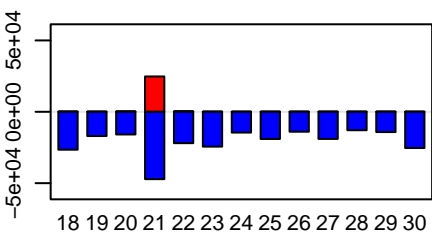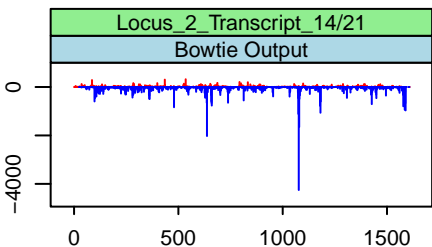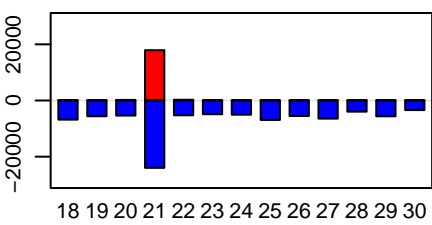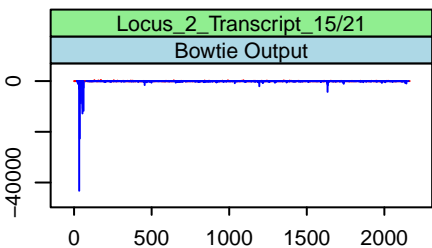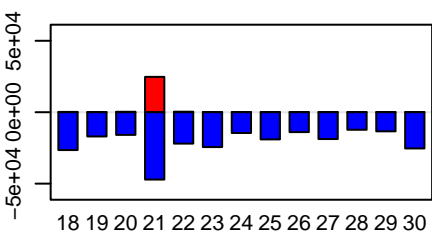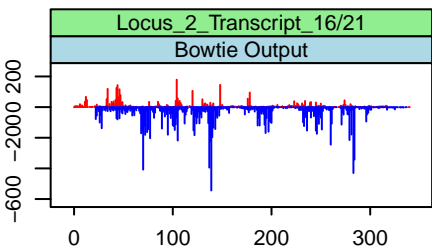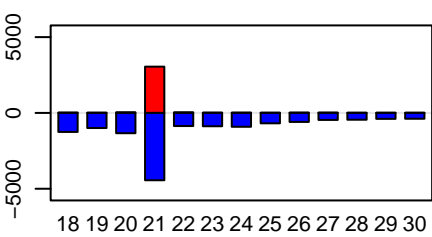

Coordinates/read size

Number of reads

# Readmaps and size distributions

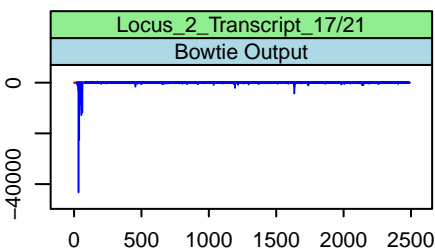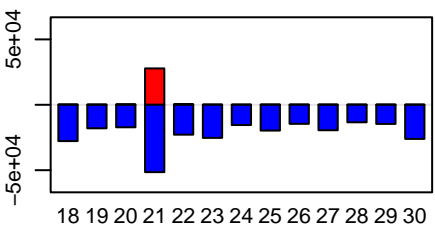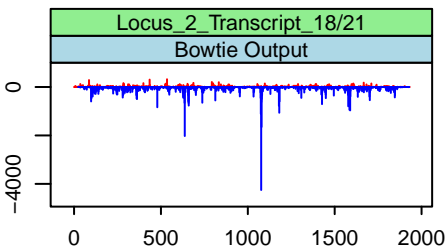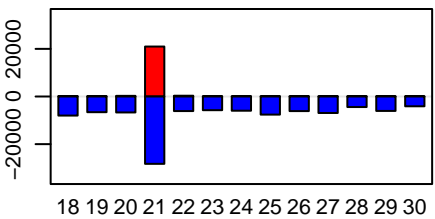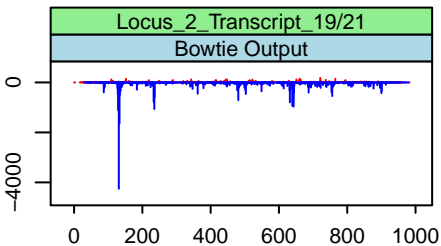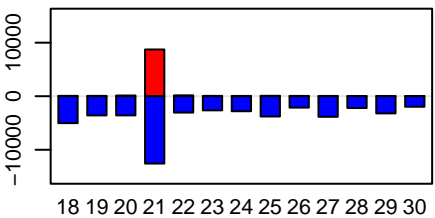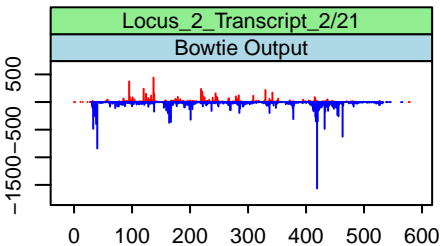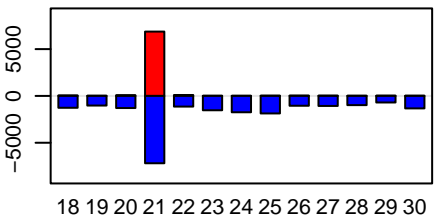

Coordinates/read size

Number of reads

# Readmaps and size distributions

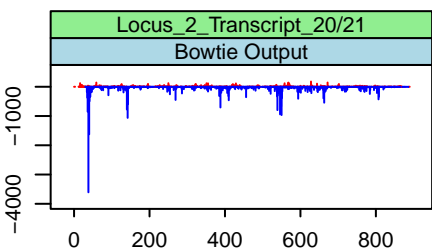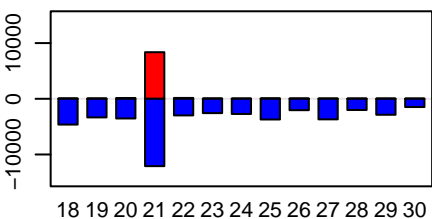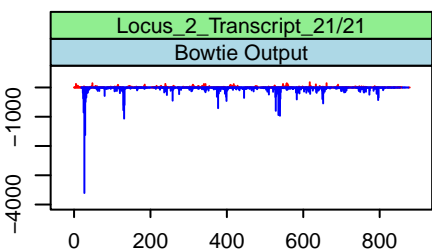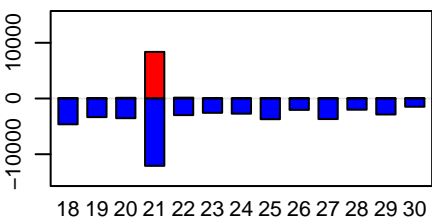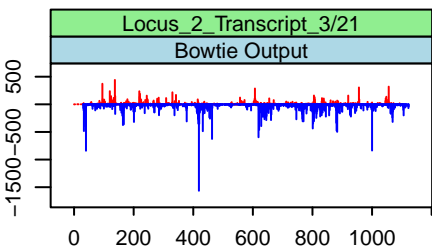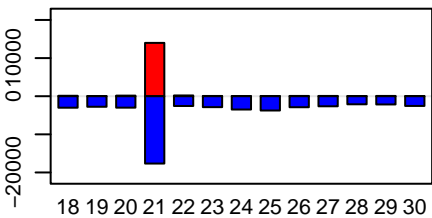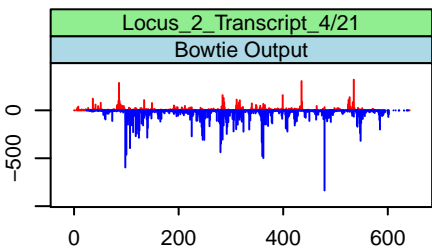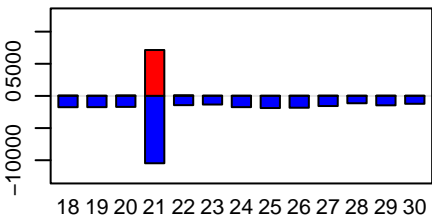

Coordinates/read size

# Readmaps and size distributions

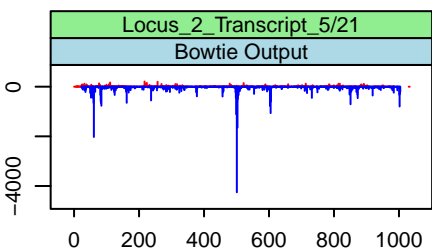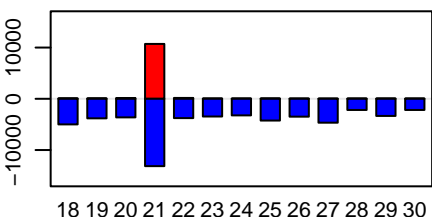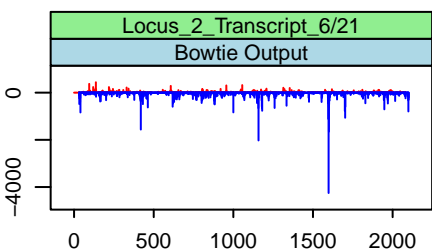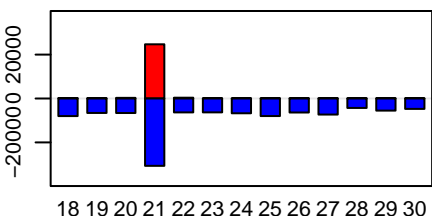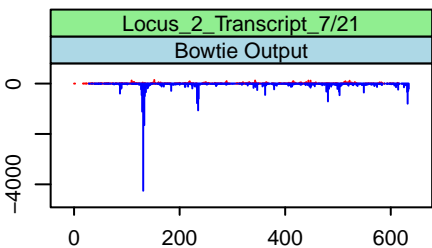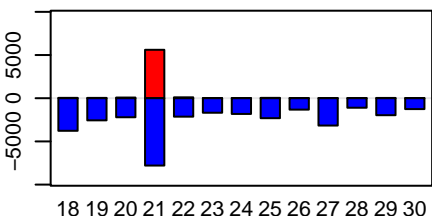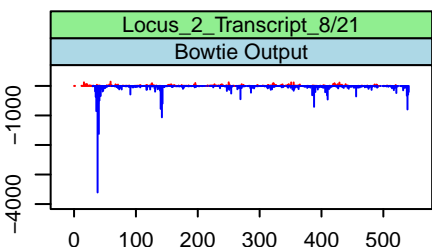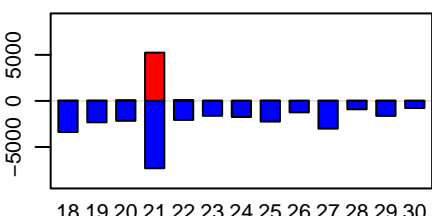

Coordinates/read size

# Readmaps and size distributions

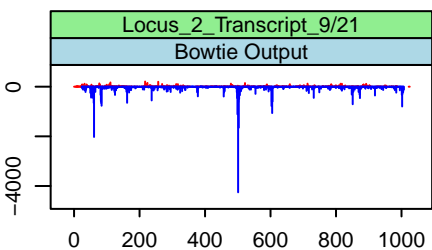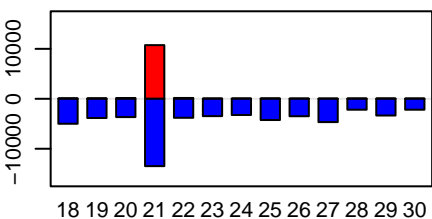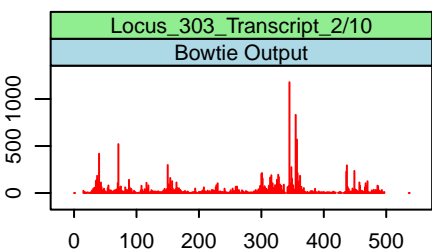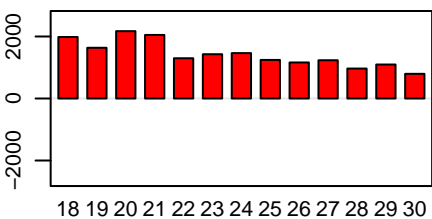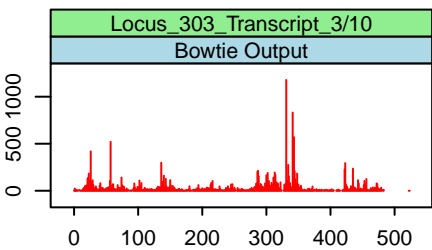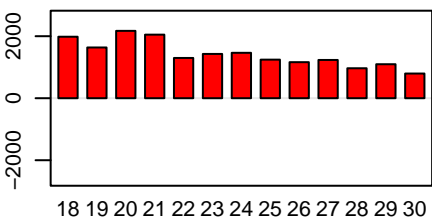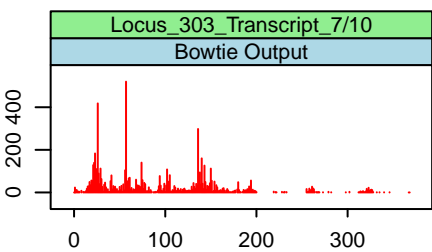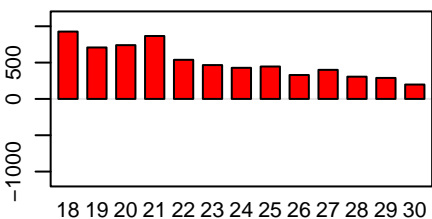

Coordinates/read size

# Readmaps and size distributions

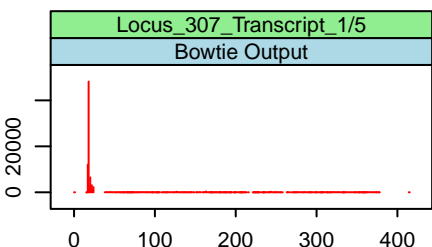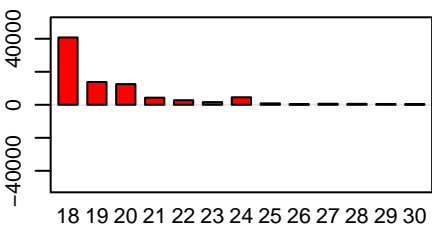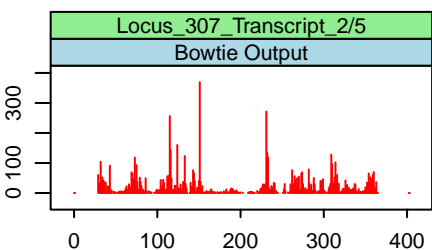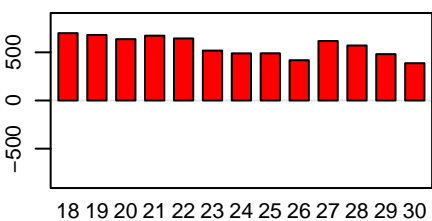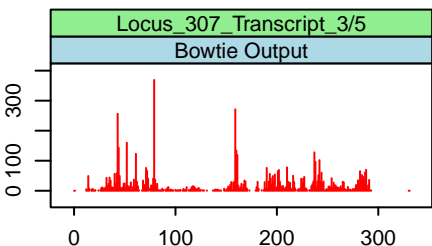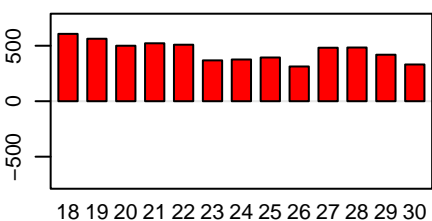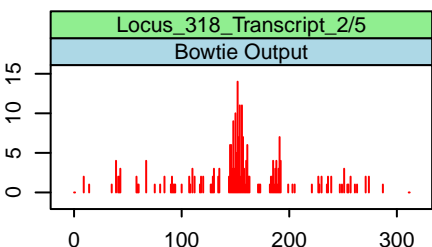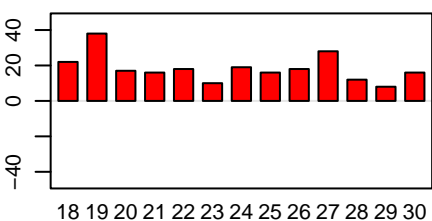

Coordinates/read size



# Readmaps and size distributions

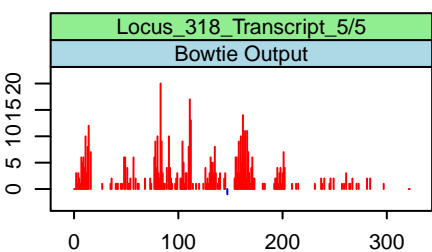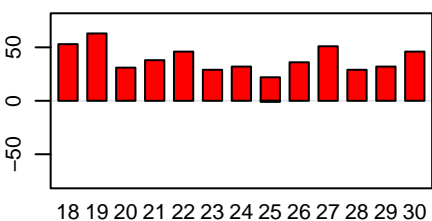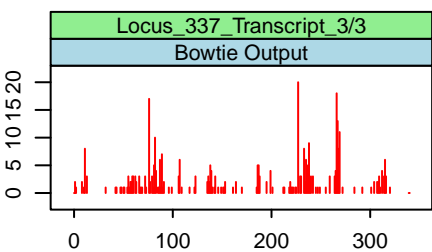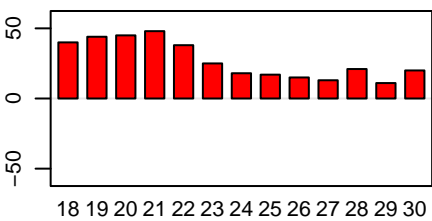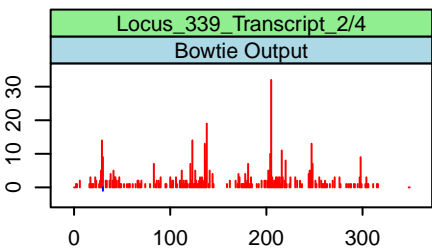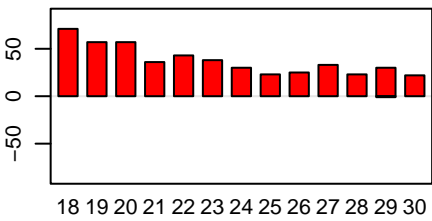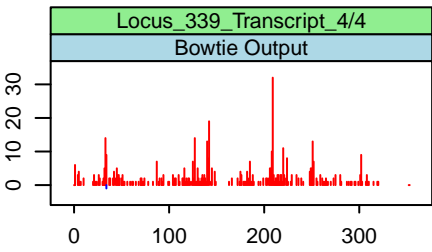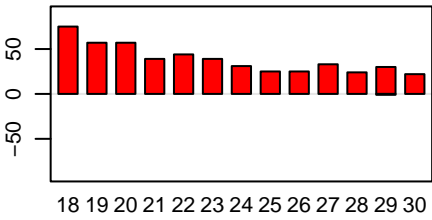

Coordinates/read size

# Readmaps and size distributions

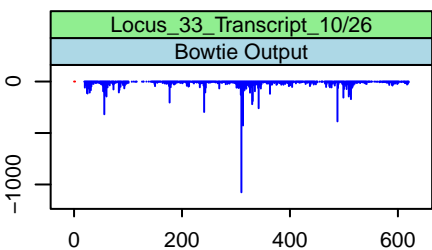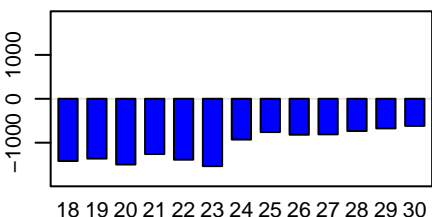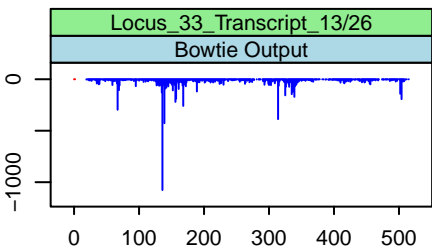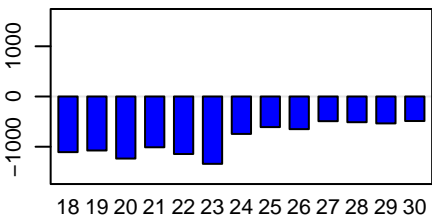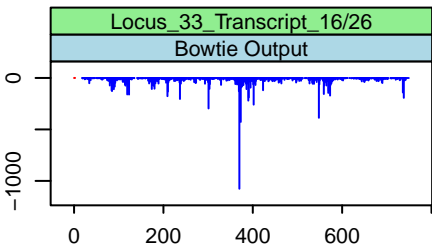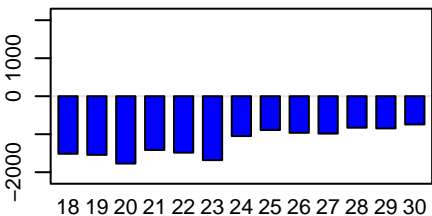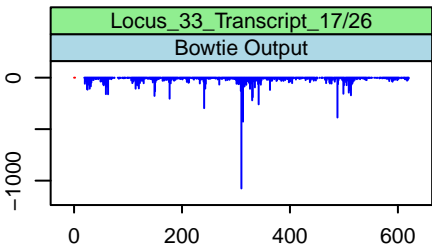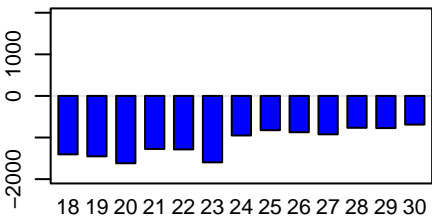

Coordinates/read size

Number of reads

# Readmaps and size distributions

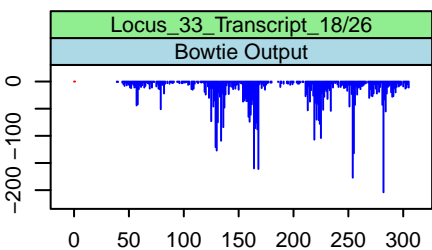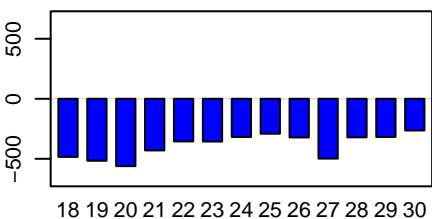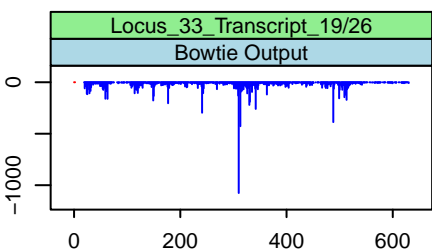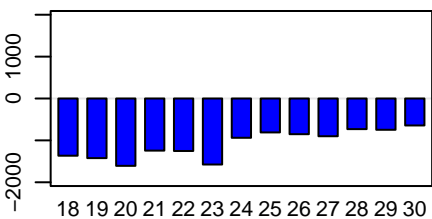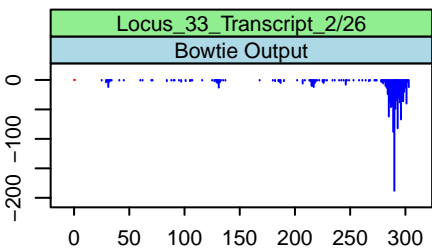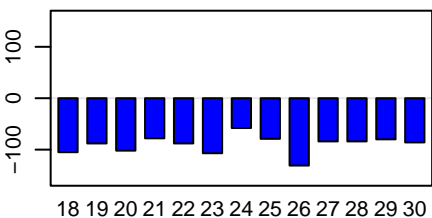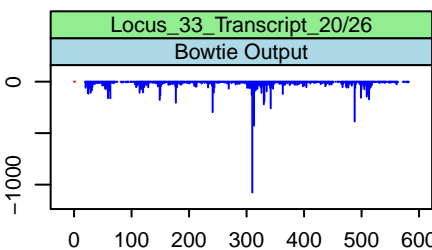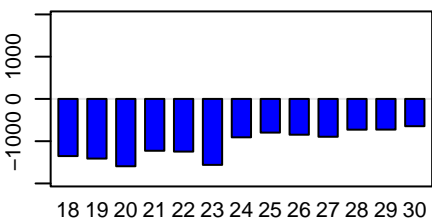

Coordinates/read size

# Readmaps and size distributions

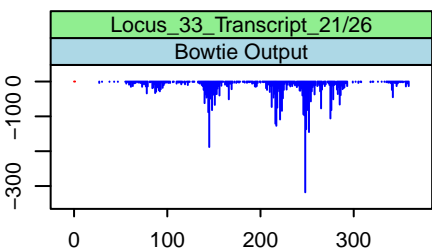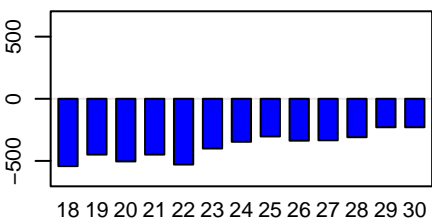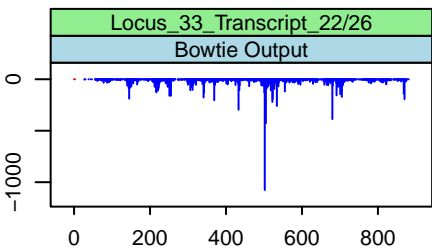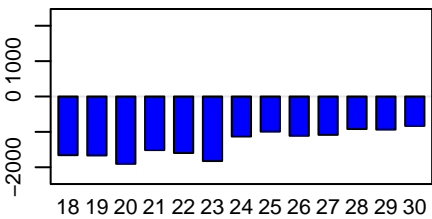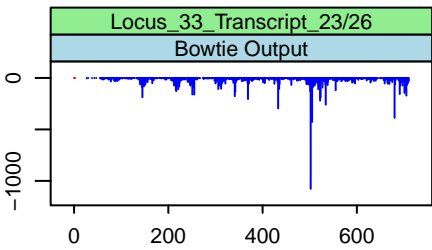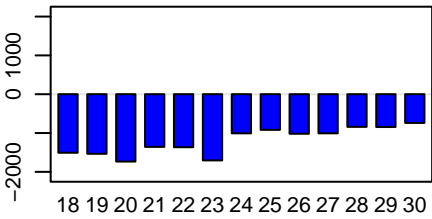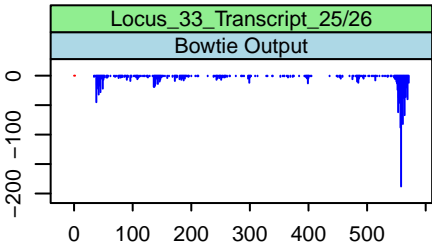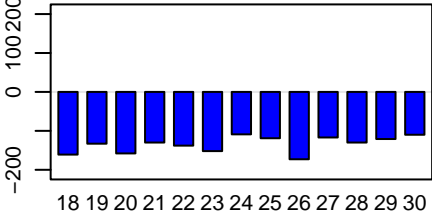

Coordinates/read size

Number of reads

# Readmaps and size distributions

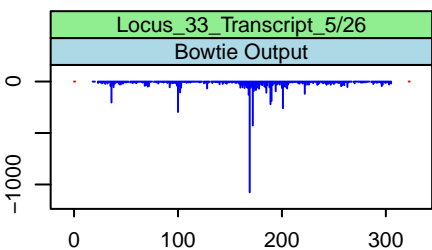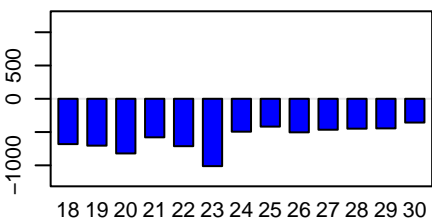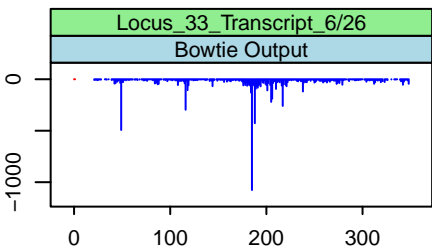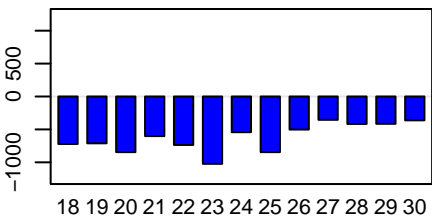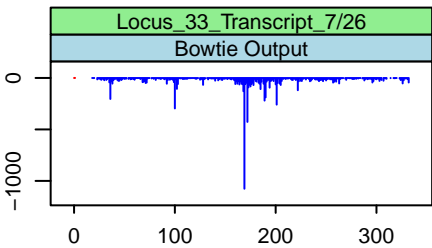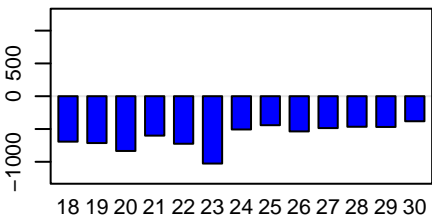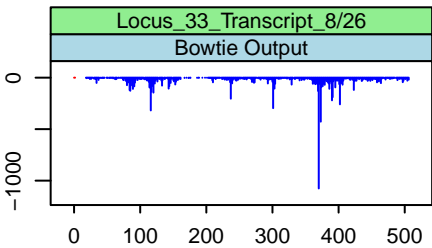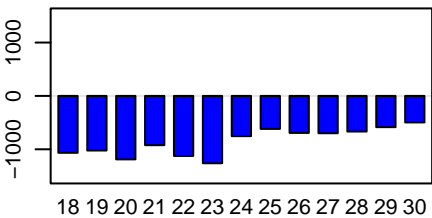

Coordinates/read size

# Readmaps and size distributions

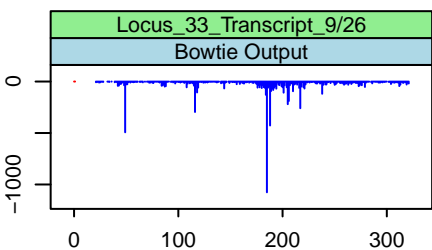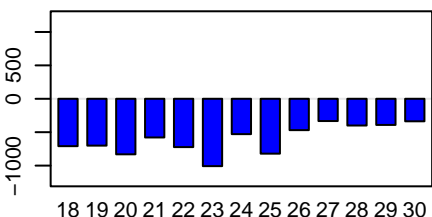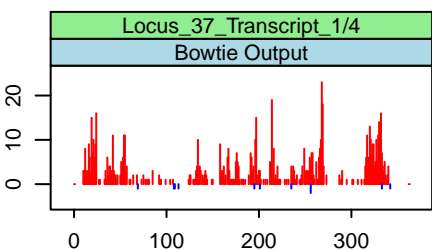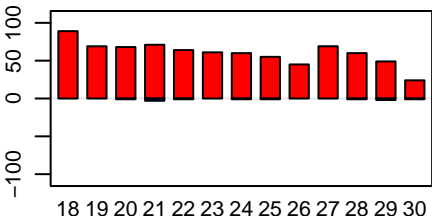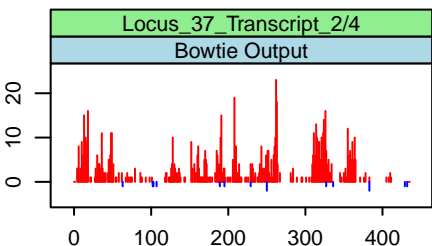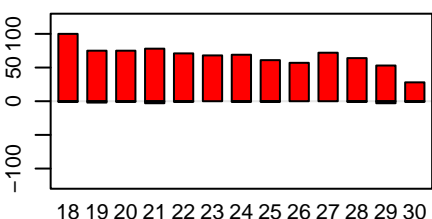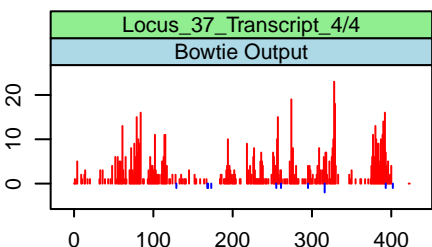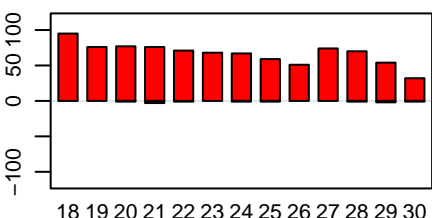

Coordinates/read size

# Readmaps and size distributions

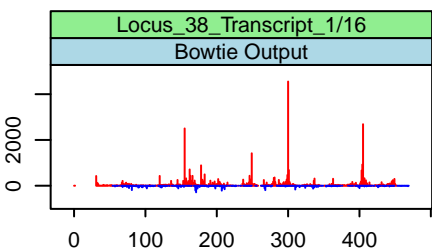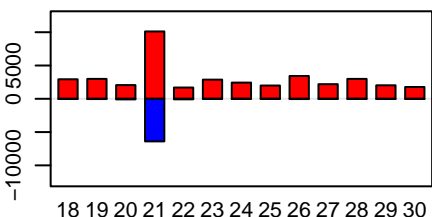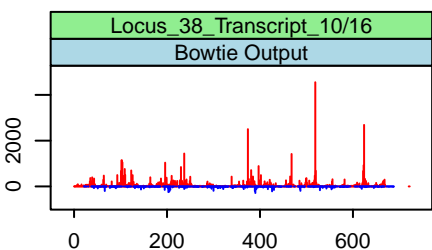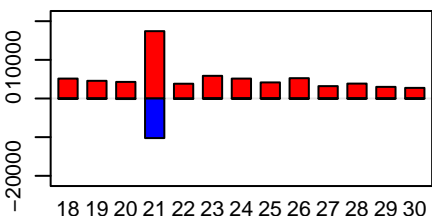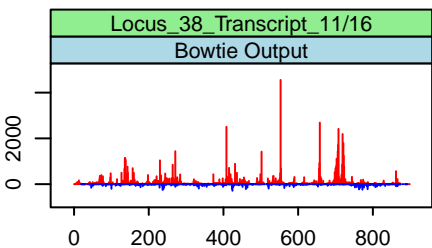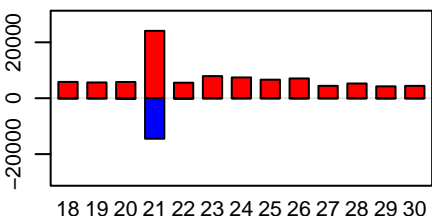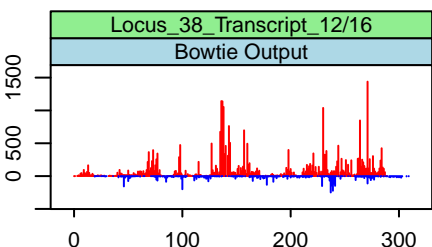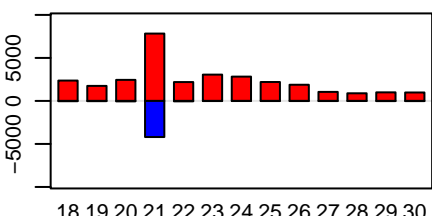

Coordinates/read size

# Readmaps and size distributions

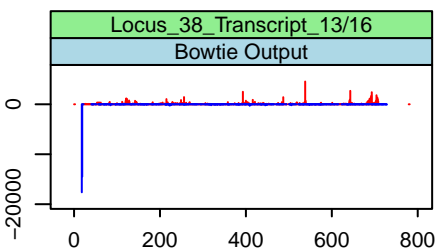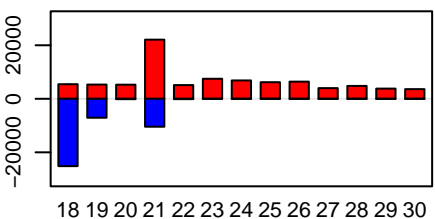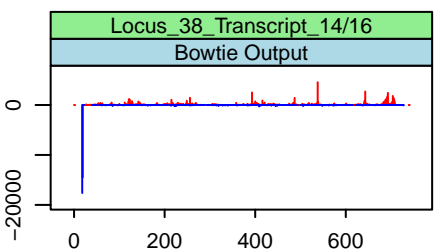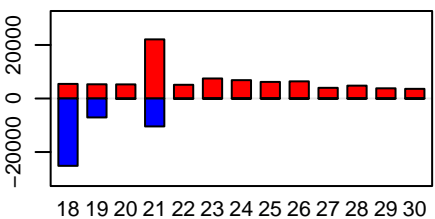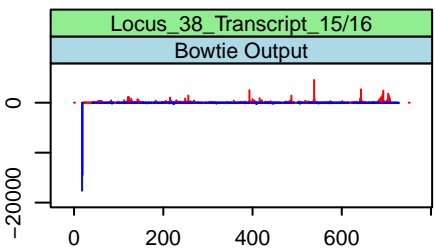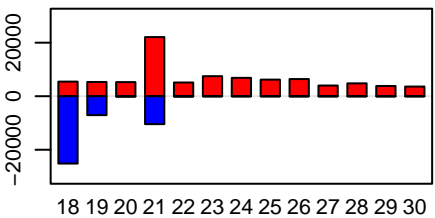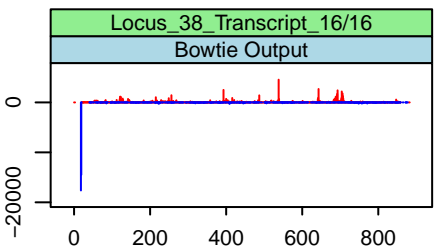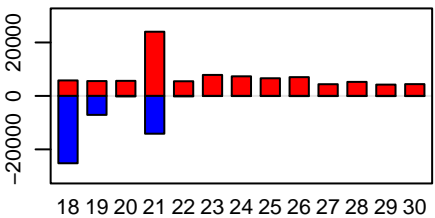

Coordinates/read size



# Readmaps and size distributions

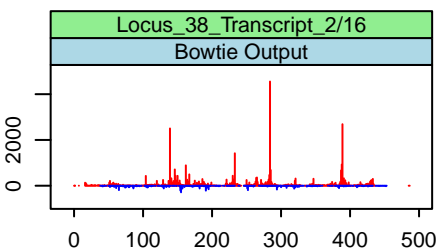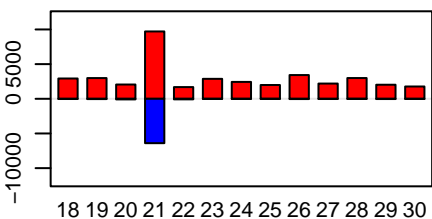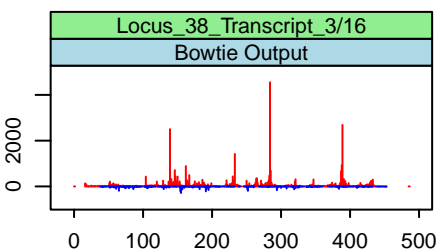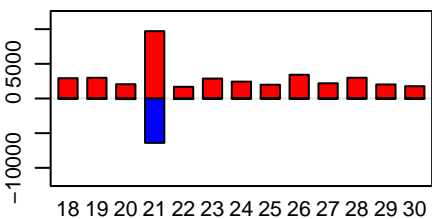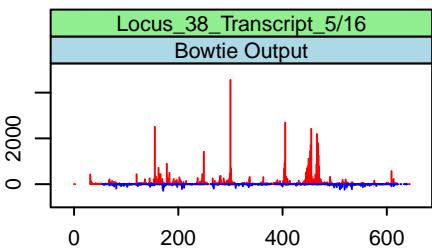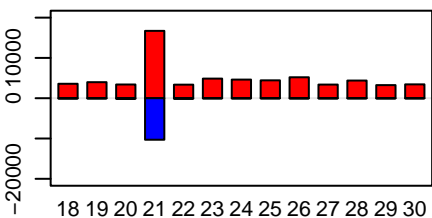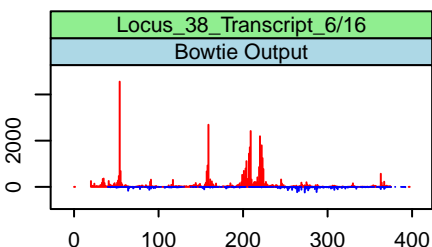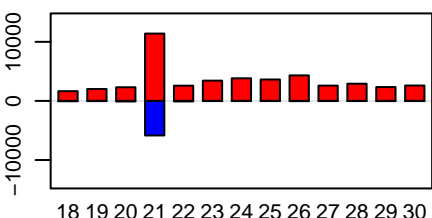

Coordinates/read size

# Readmaps and size distributions

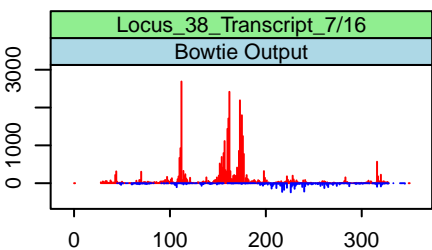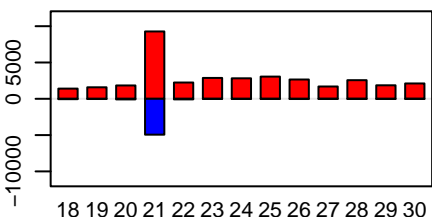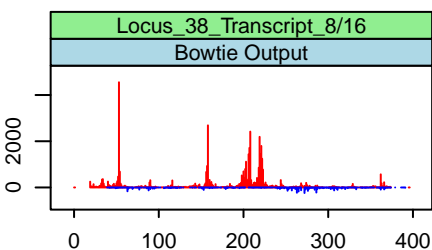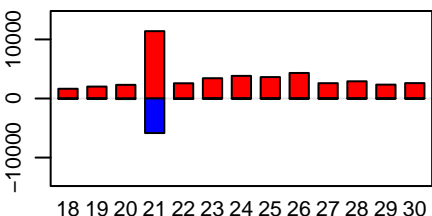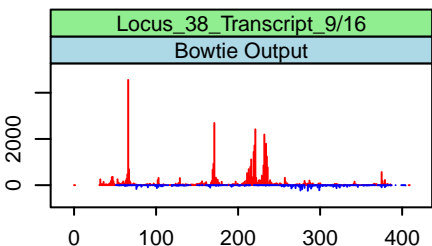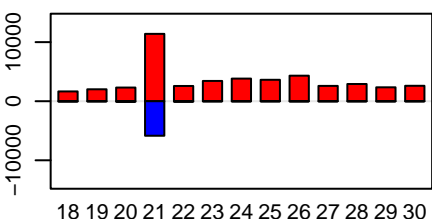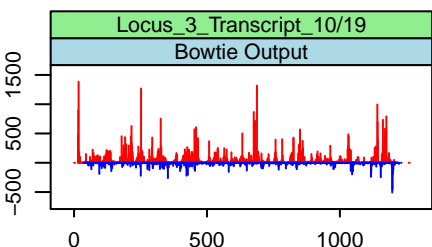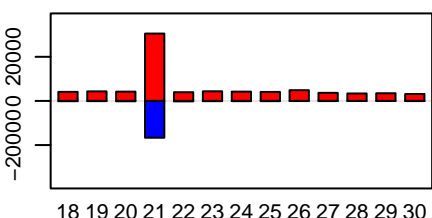

Coordinates/read size

# Readmaps and size distributions

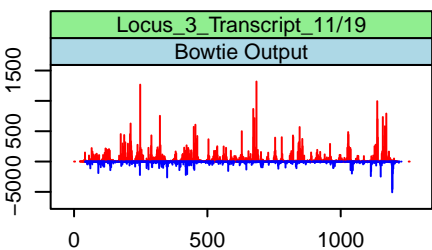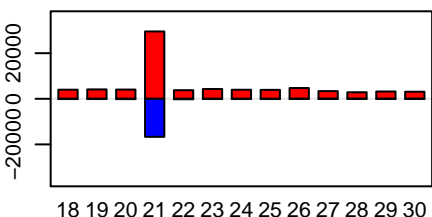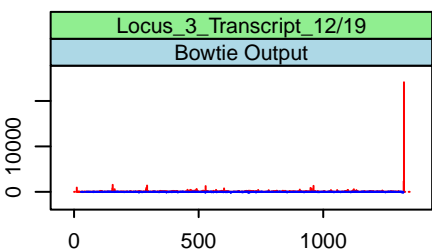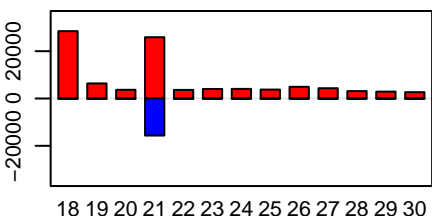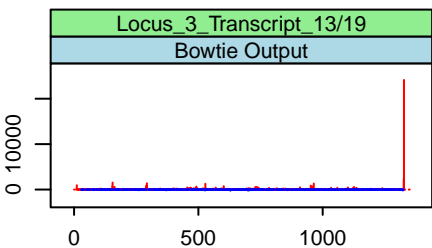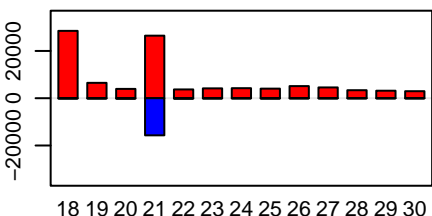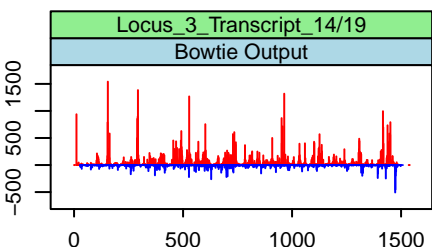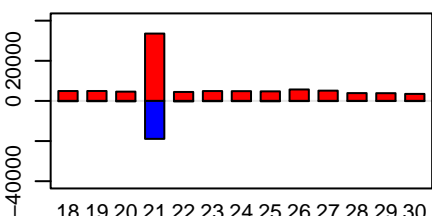

Coordinates/read size

# Readmaps and size distributions

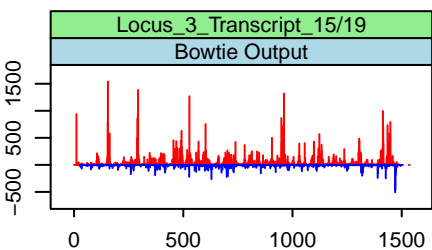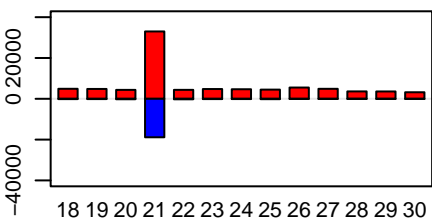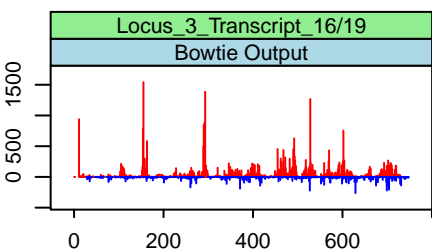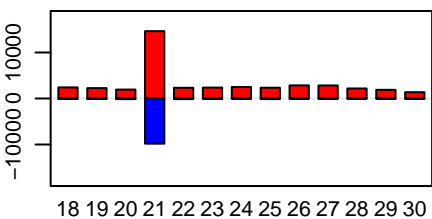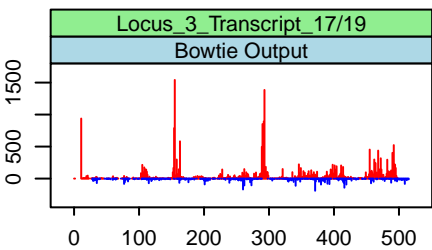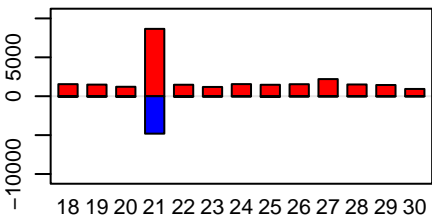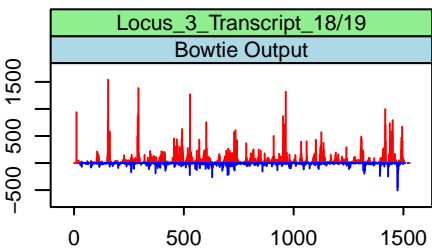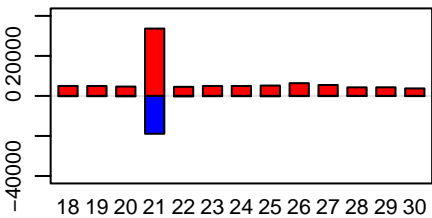

Number of reads

Coordinates/read size

# Readmaps and size distributions

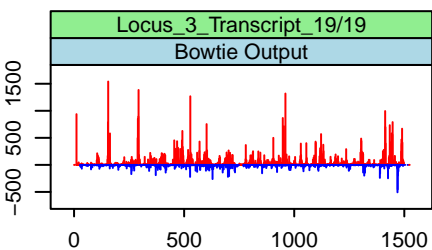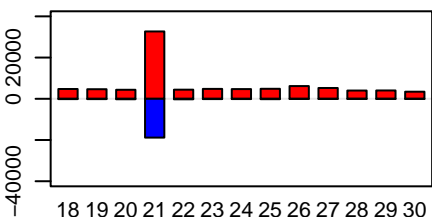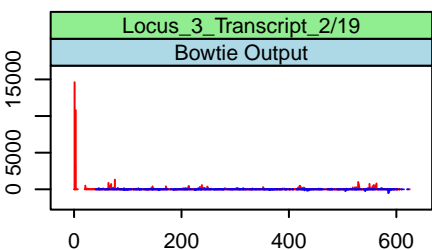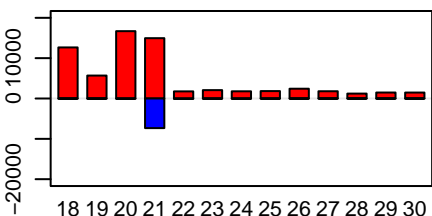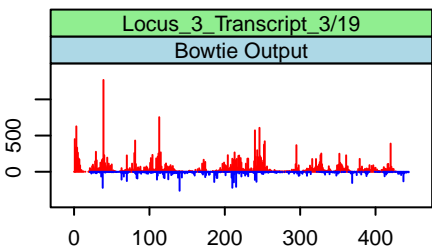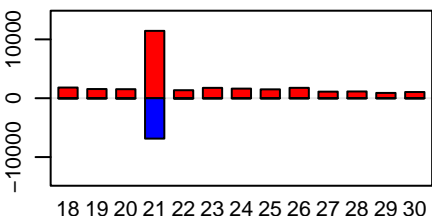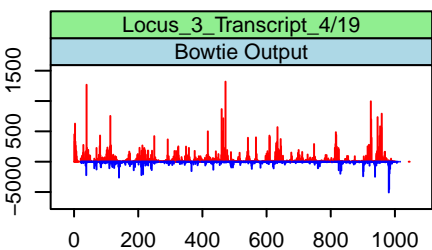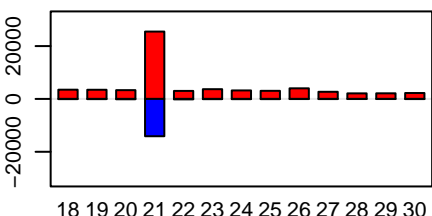

Coordinates/read size

# Readmaps and size distributions

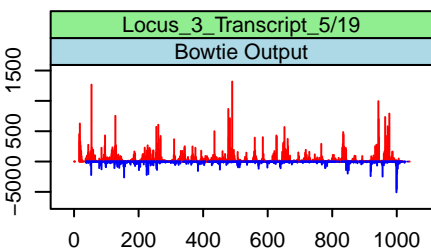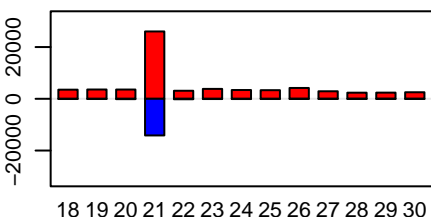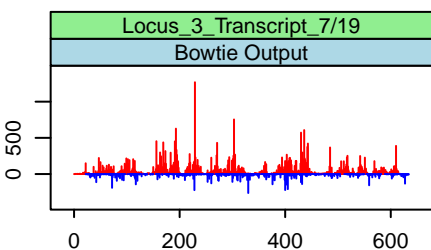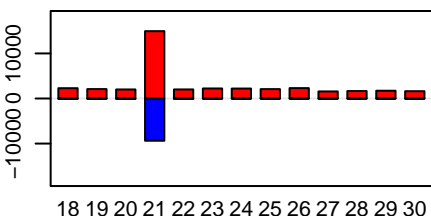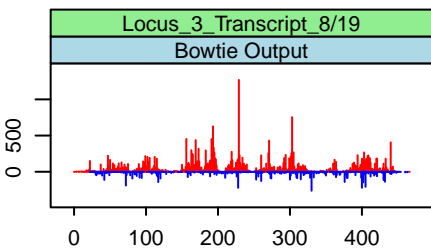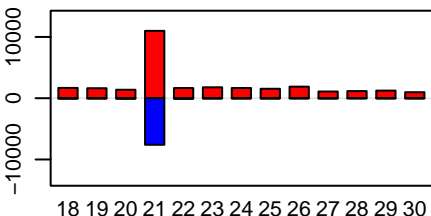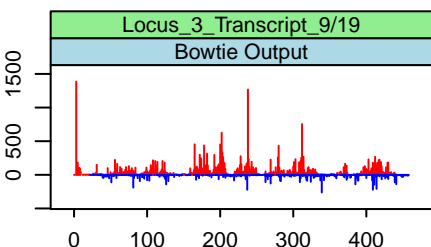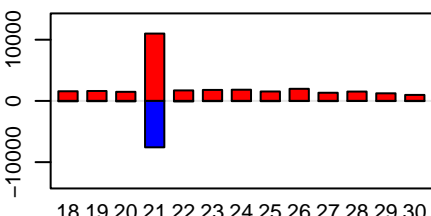

Coordinates/read size

# Readmaps and size distributions

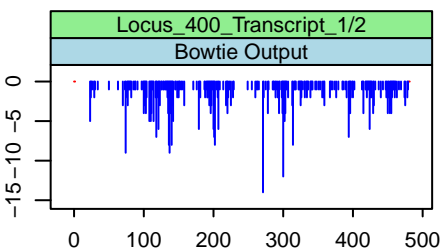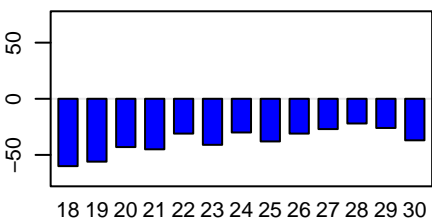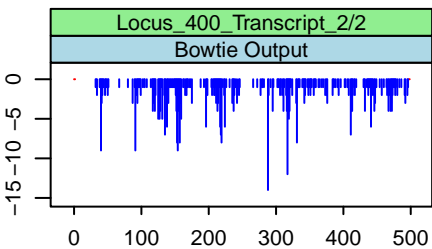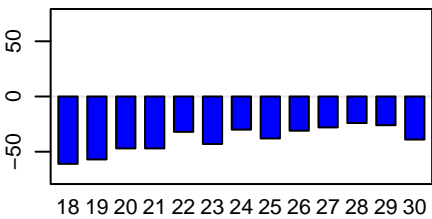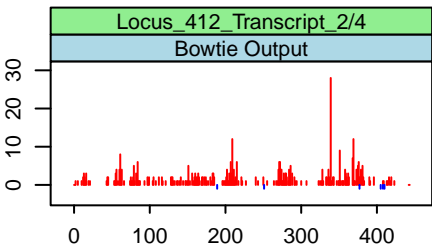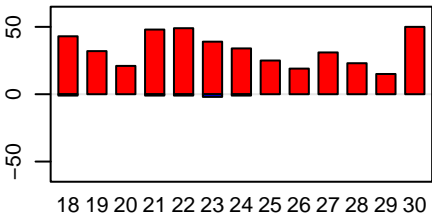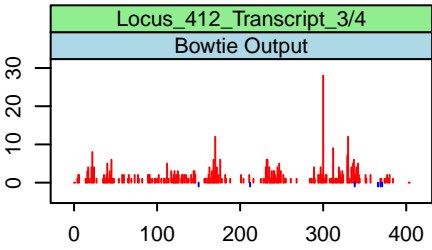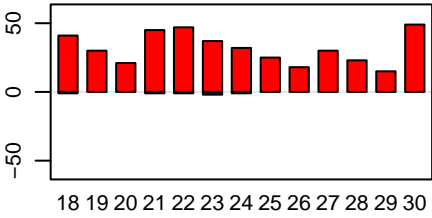

Coordinates/read size

Number of reads

# Readmaps and size distributions

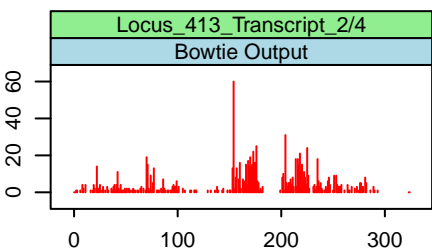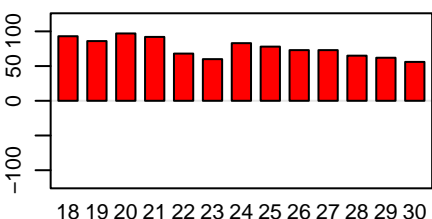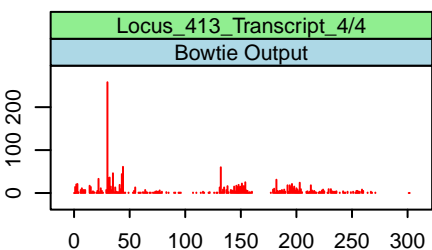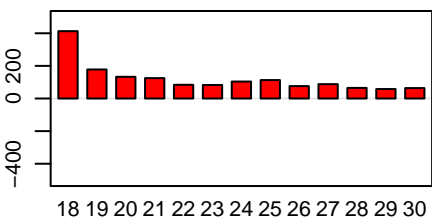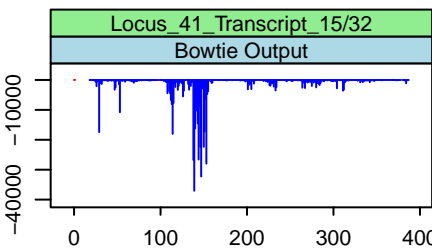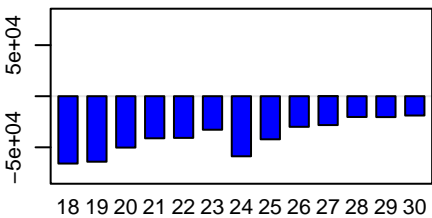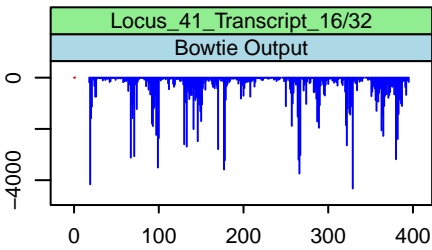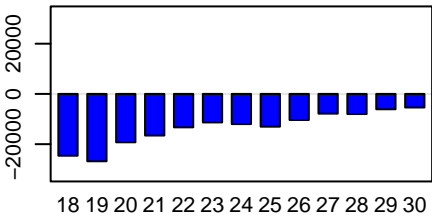

Coordinates/read size



# Readmaps and size distributions

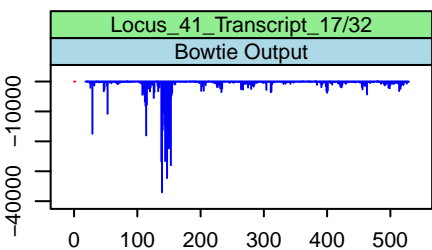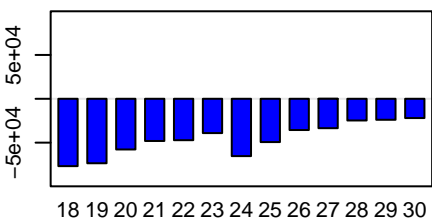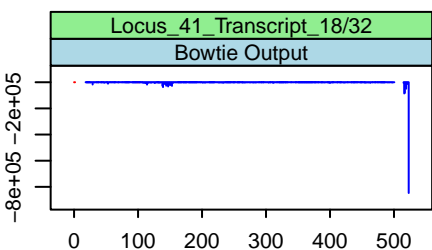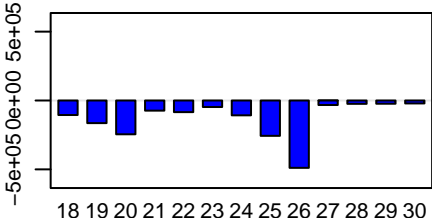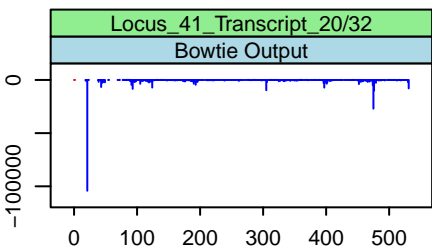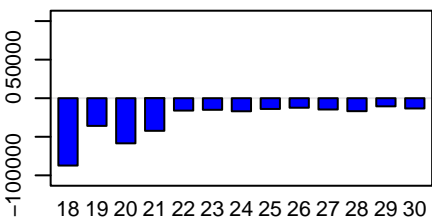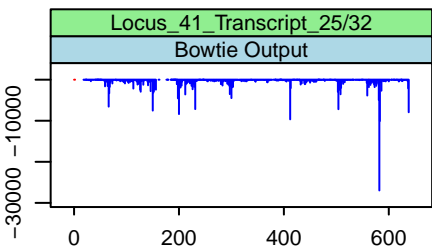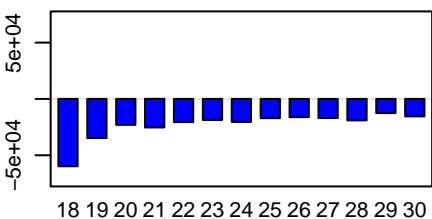

Coordinates/read size

# Readmaps and size distributions

Number of reads

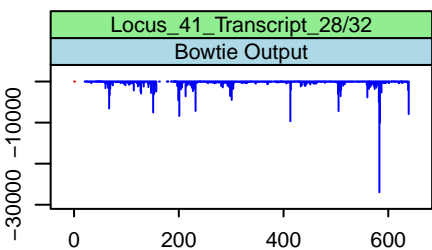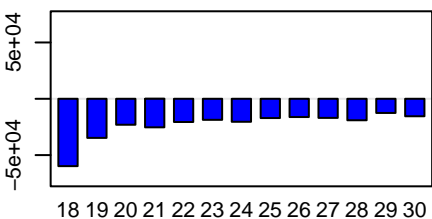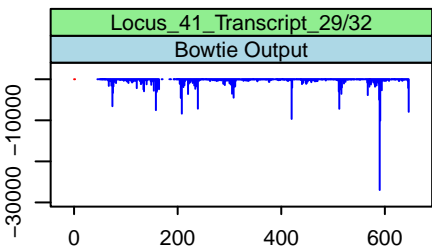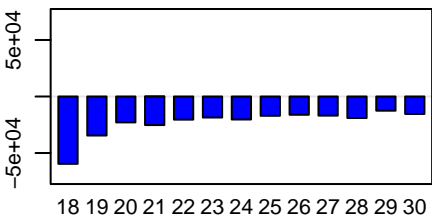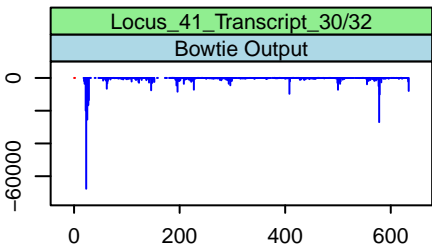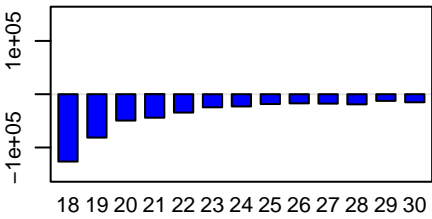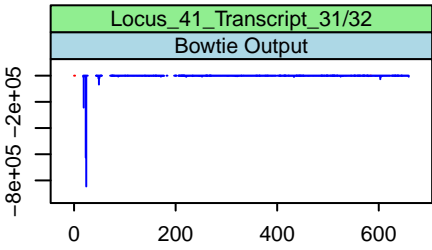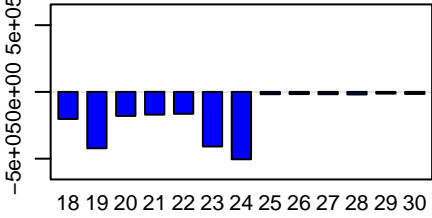

Coordinates/read size

# Readmaps and size distributions

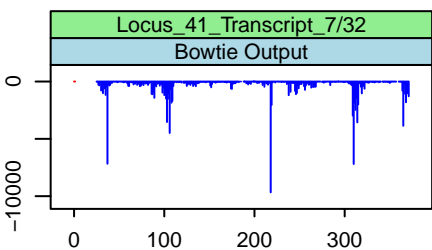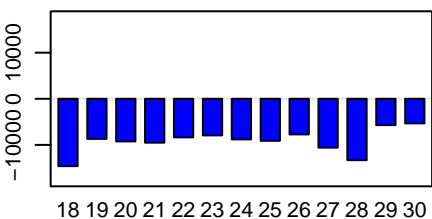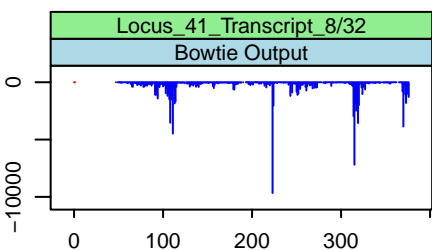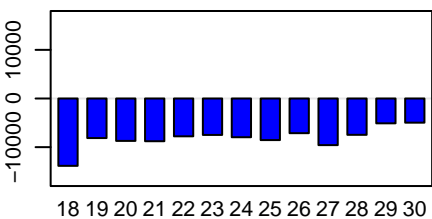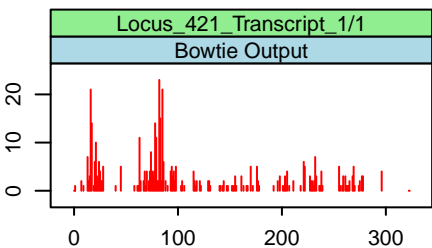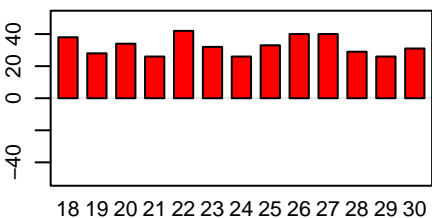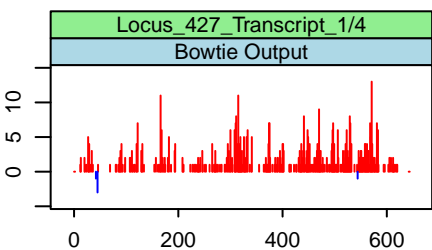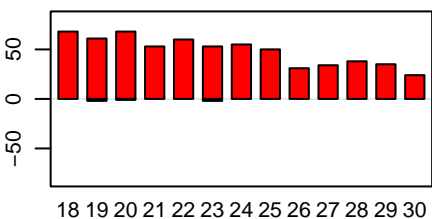

Coordinates/read size

# Readmaps and size distributions

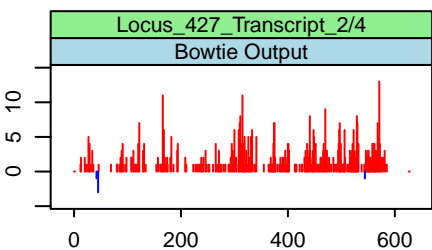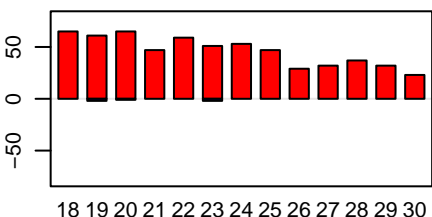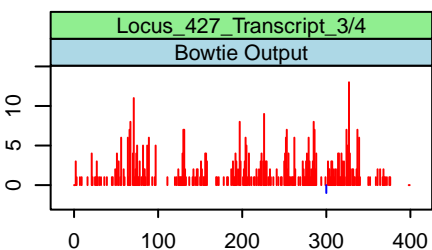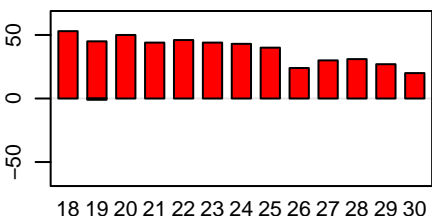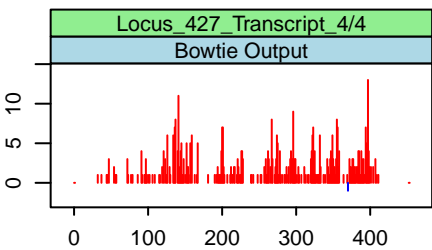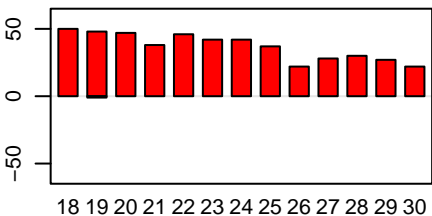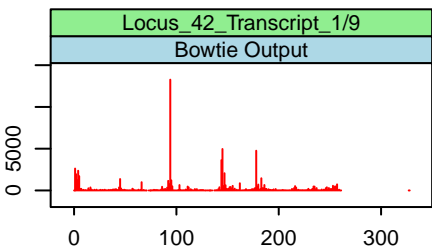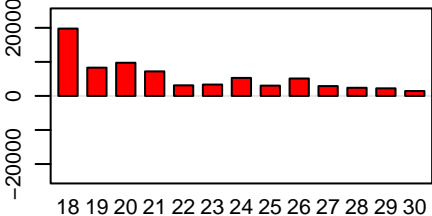

Coordinates/read size

# Readmaps and size distributions

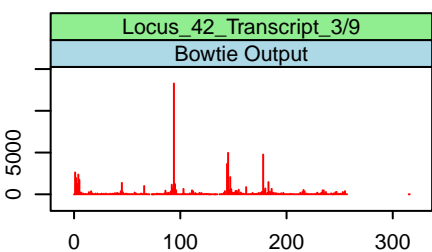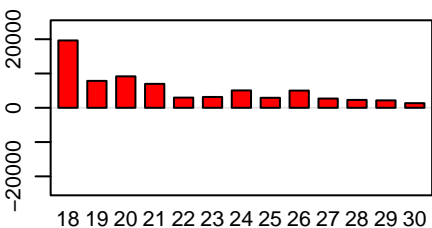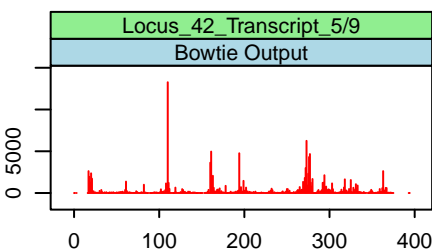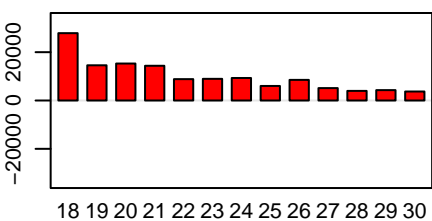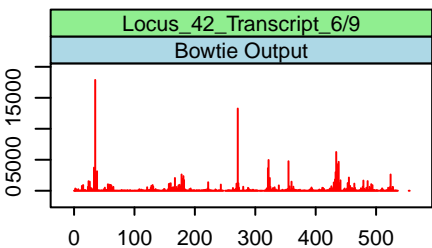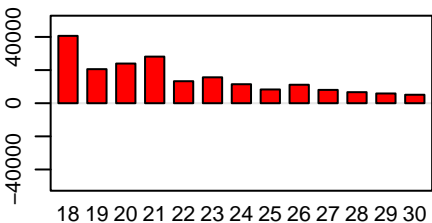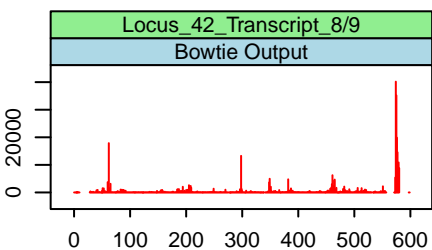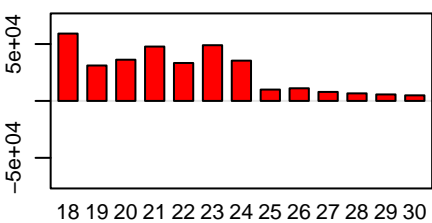

Coordinates/read size

# Readmaps and size distributions

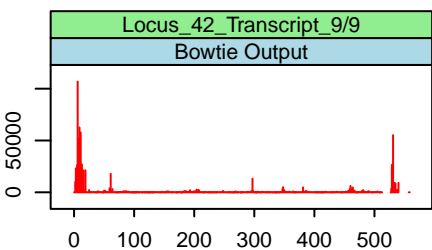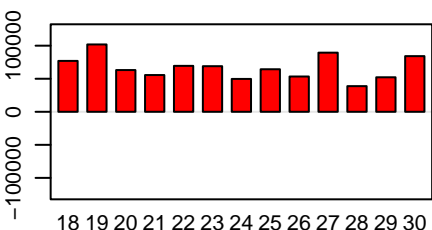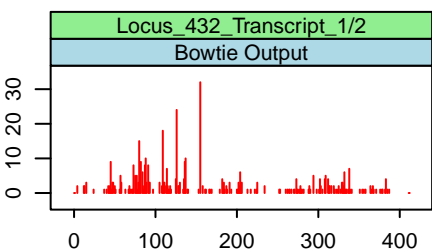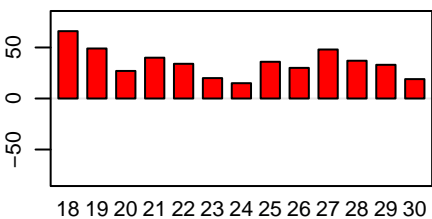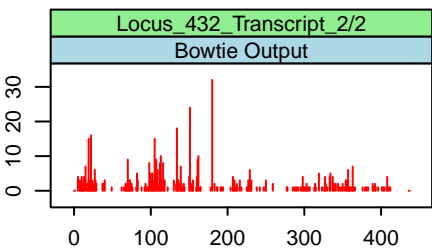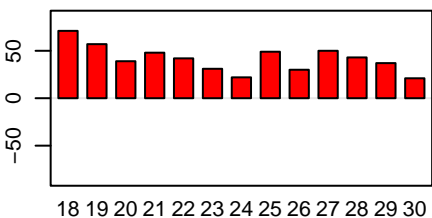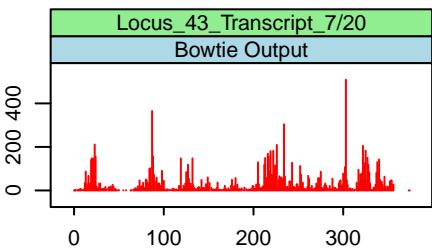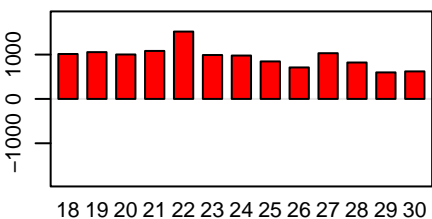

Coordinates/read size

# Readmaps and size distributions

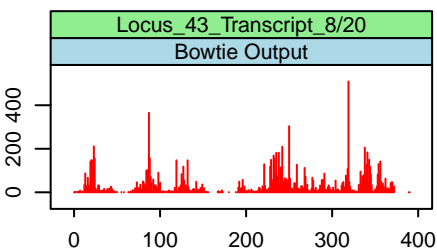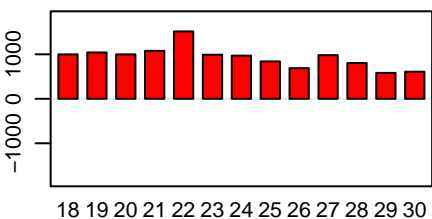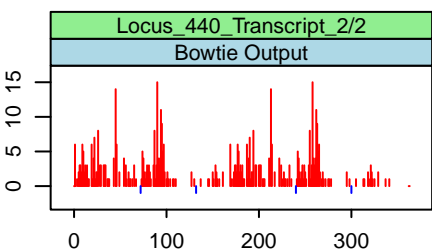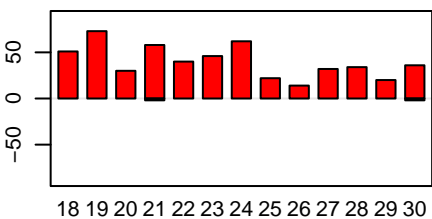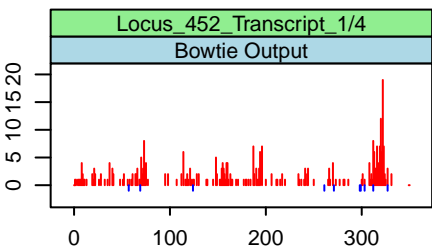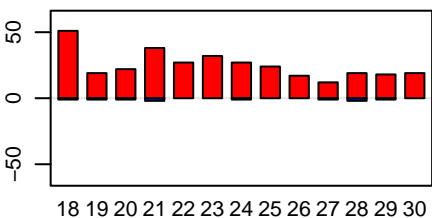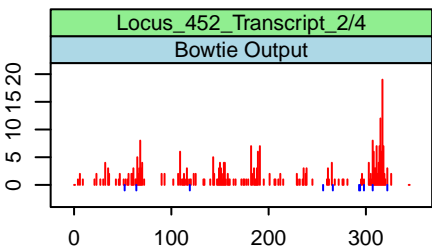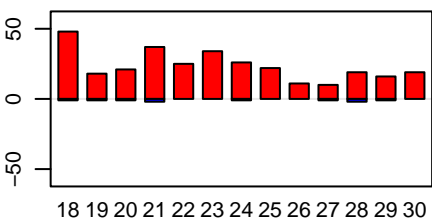

Coordinates/read size

# Readmaps and size distributions

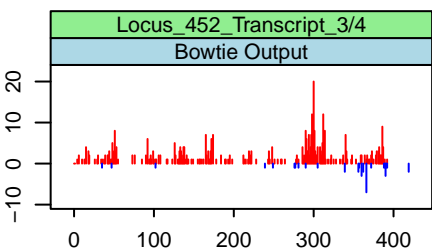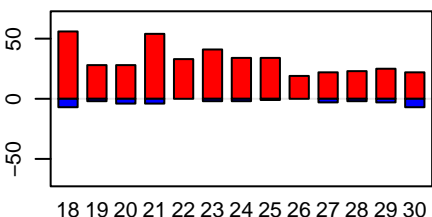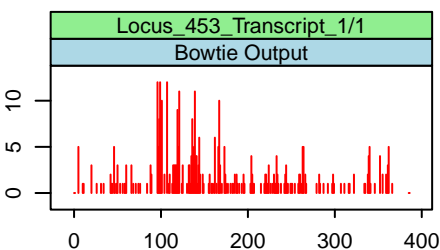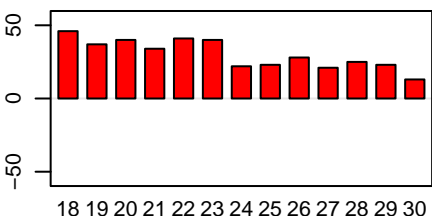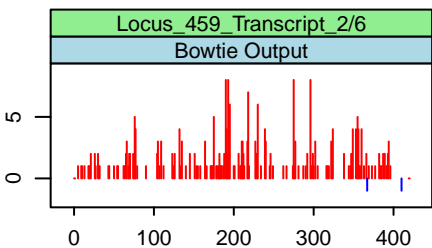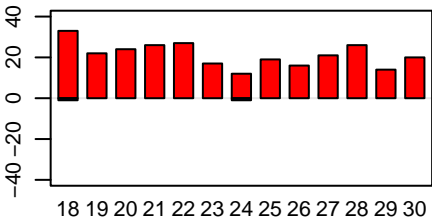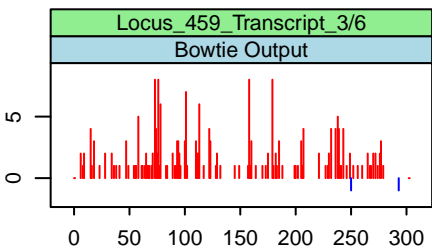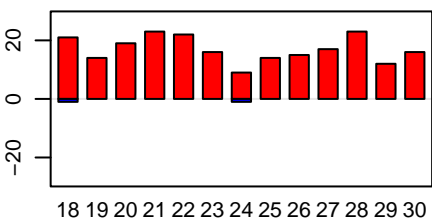

Coordinates/read size



# Readmaps and size distributions

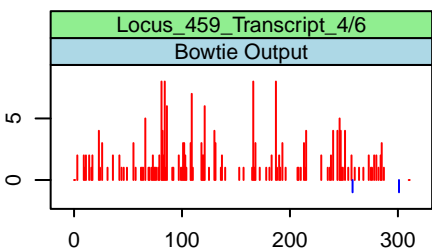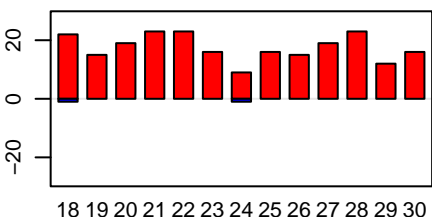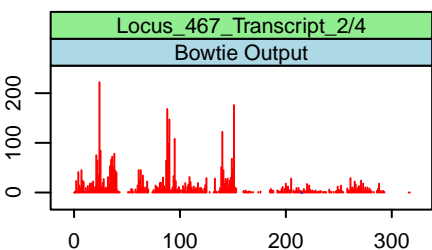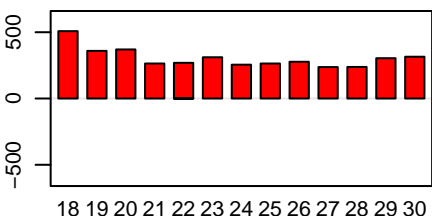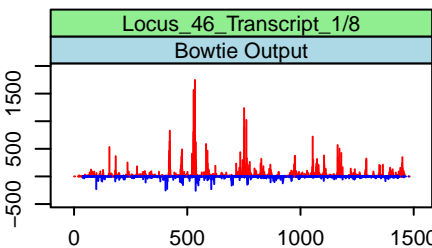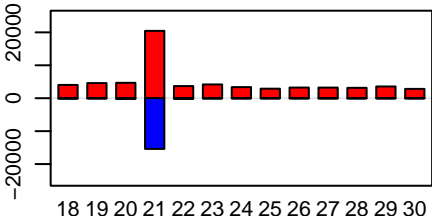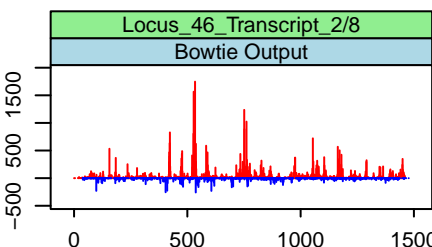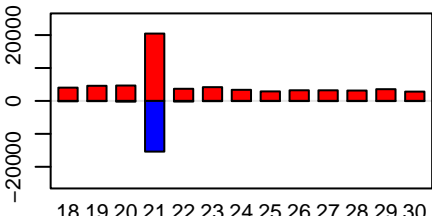

Coordinates/read size

# Readmaps and size distributions

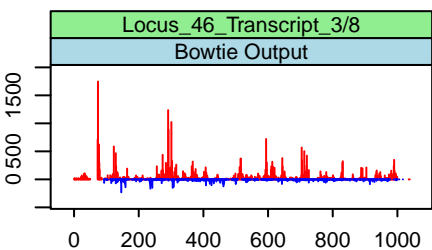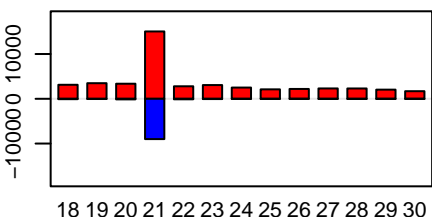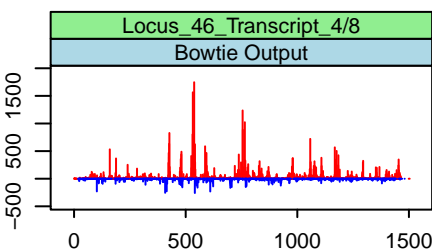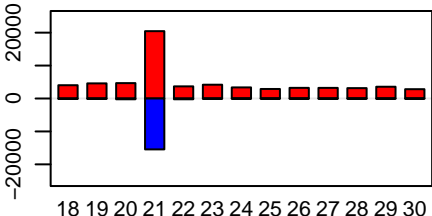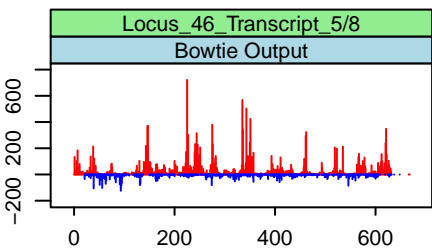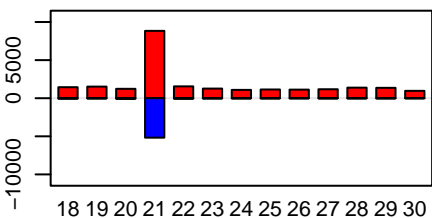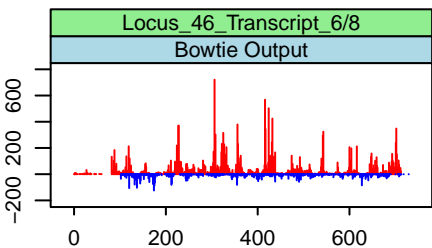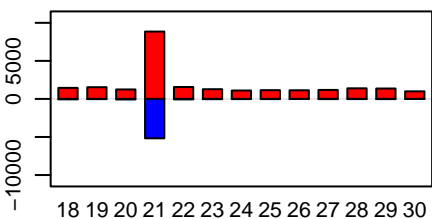

Coordinates/read size

# Readmaps and size distributions

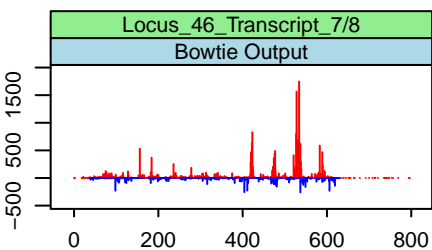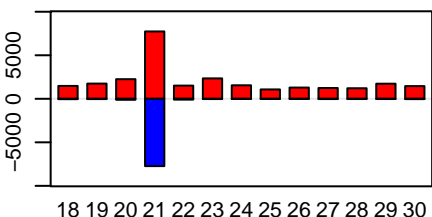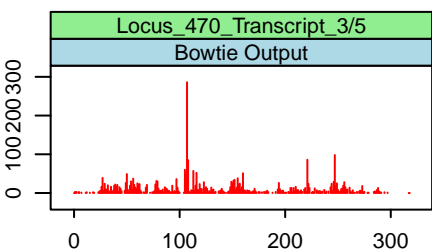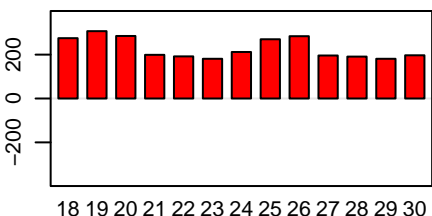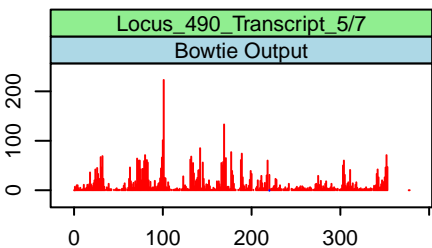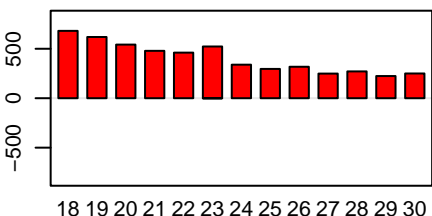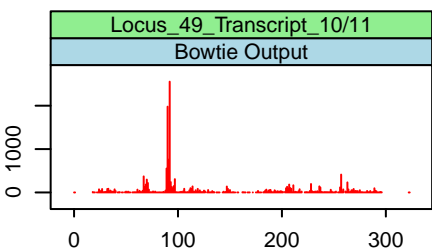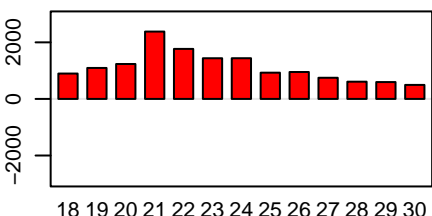

Coordinates/read size

# Readmaps and size distributions

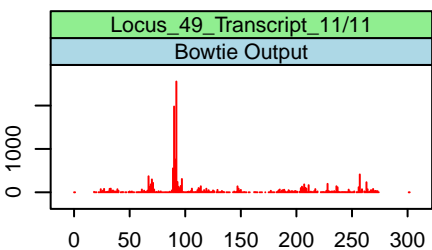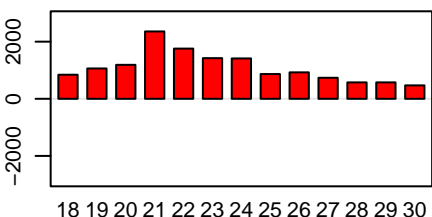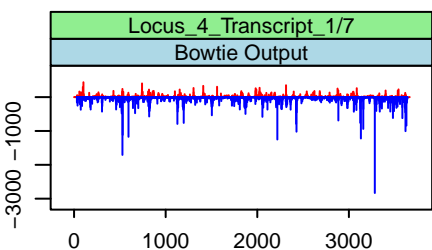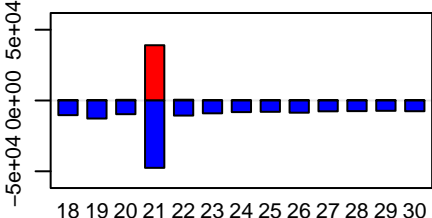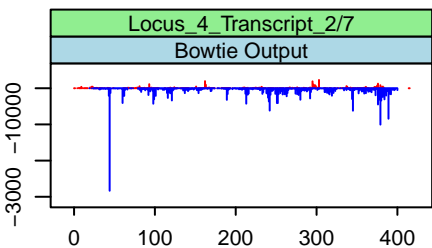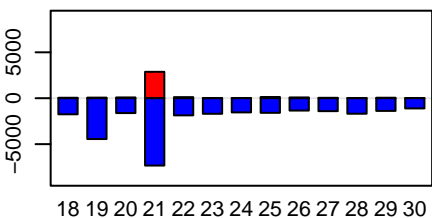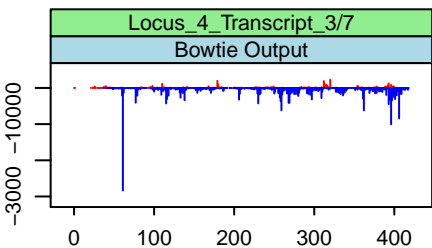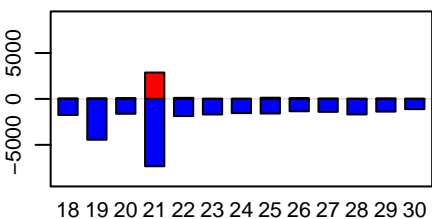

Coordinates/read size

# Readmaps and size distributions

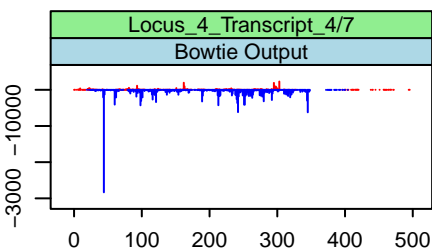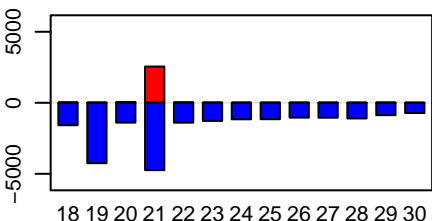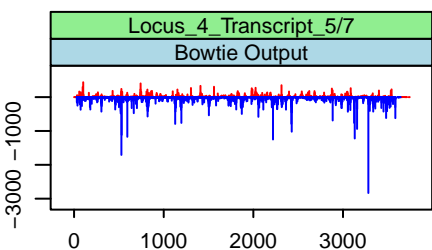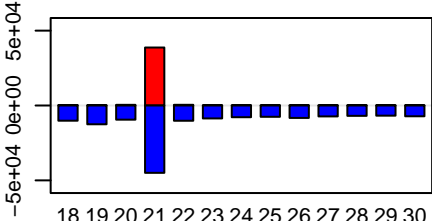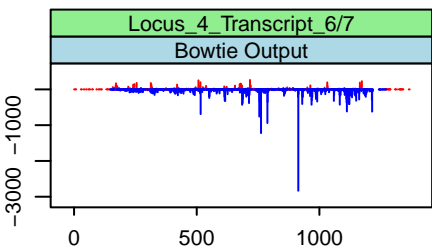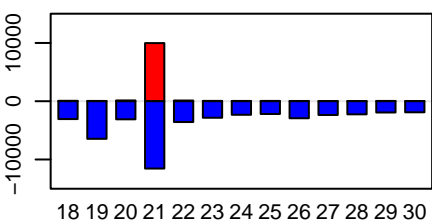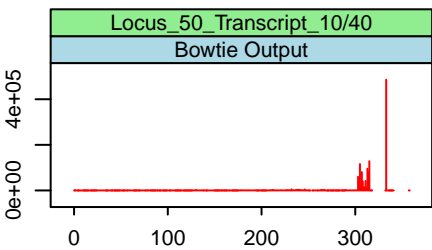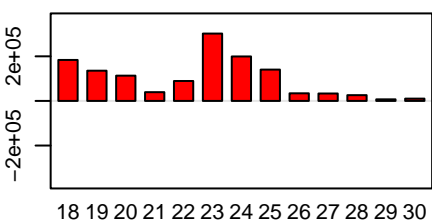

Coordinates/read size

Number of reads

# Readmaps and size distributions

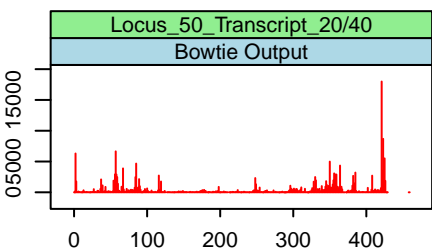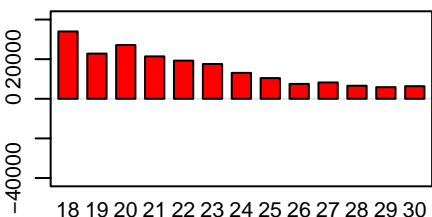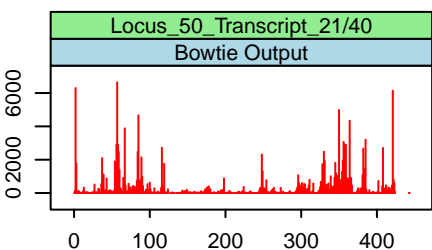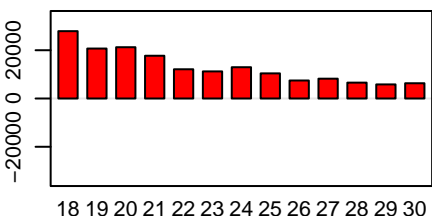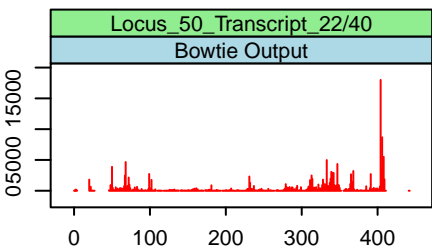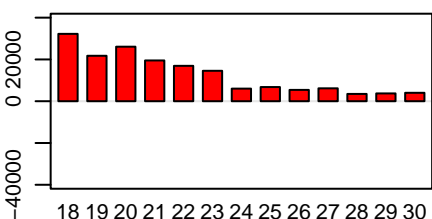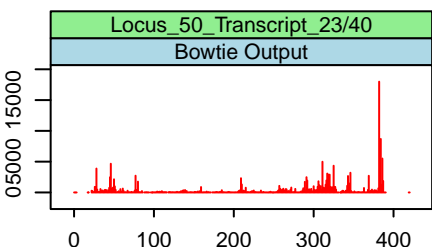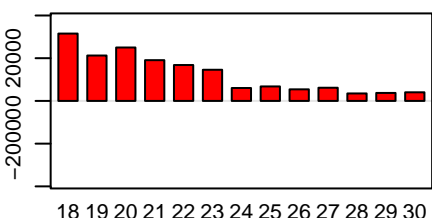

Coordinates/read size

# Readmaps and size distributions

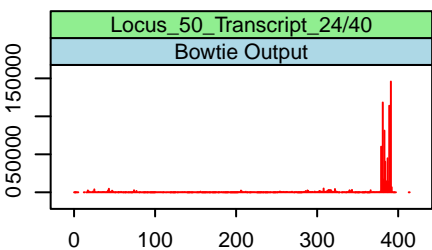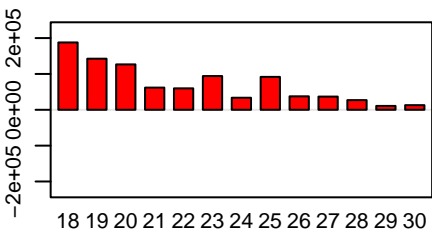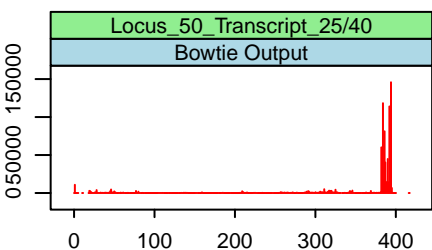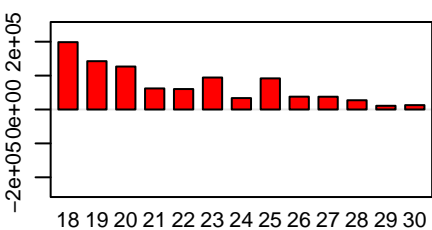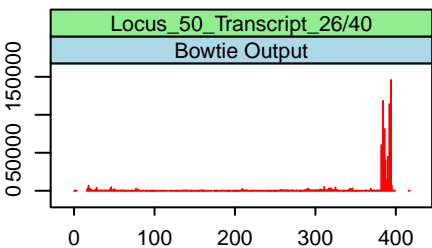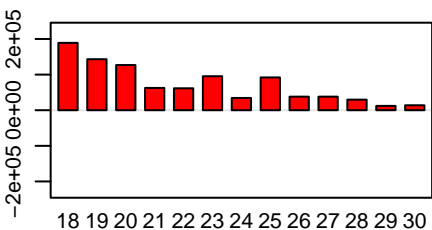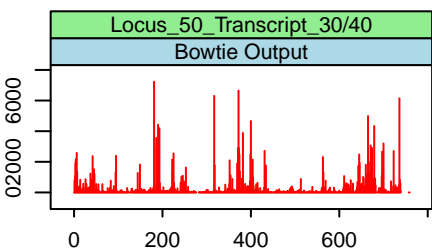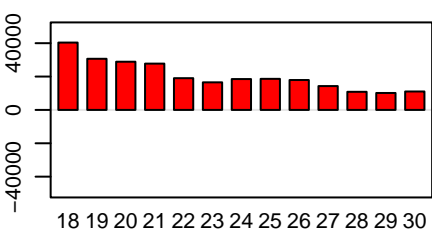

Coordinates/read size

# Readmaps and size distributions

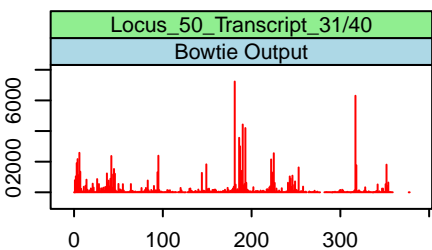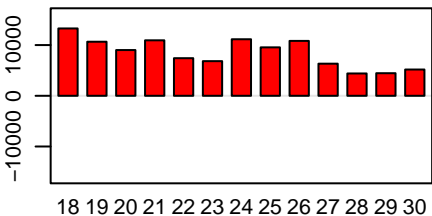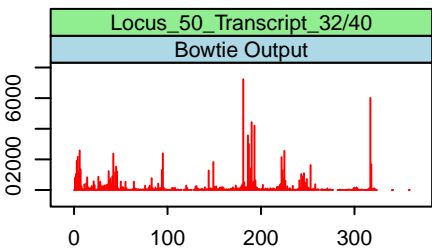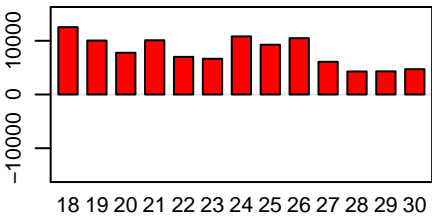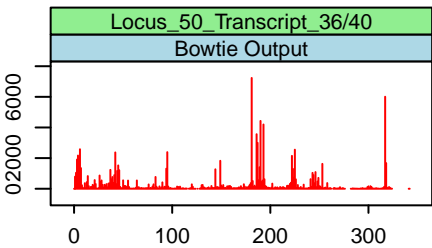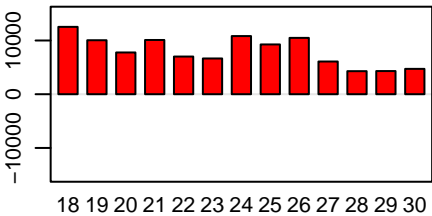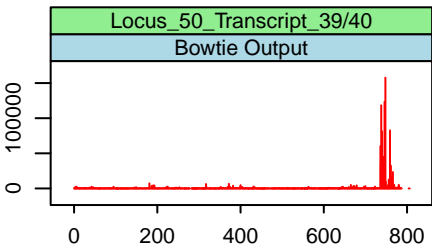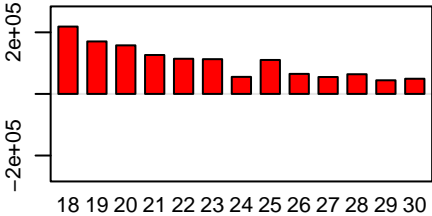

Coordinates/read size



# Readmaps and size distributions

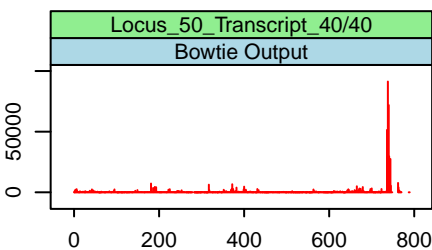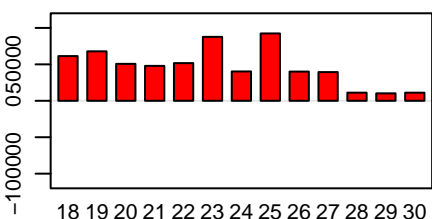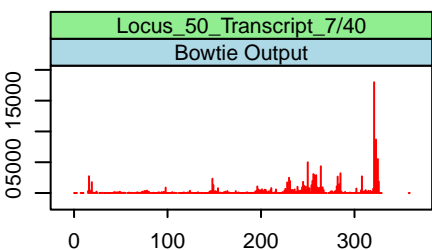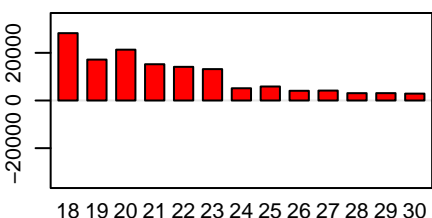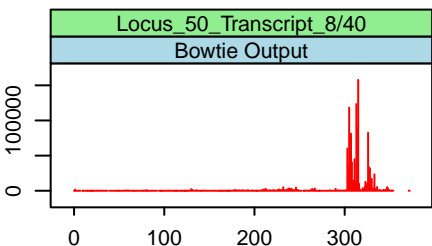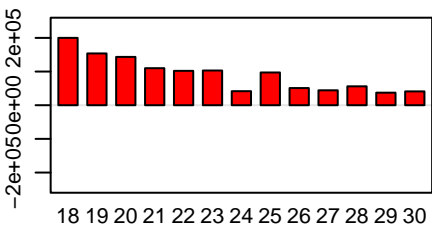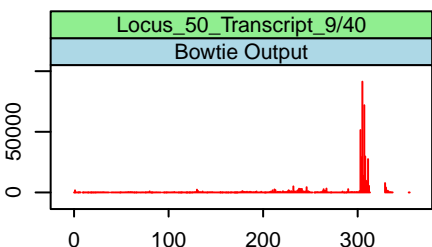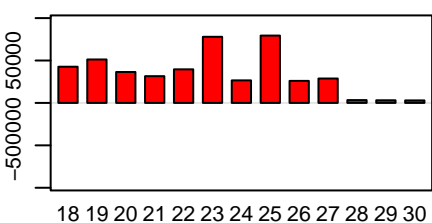

Coordinates/read size

# Readmaps and size distributions

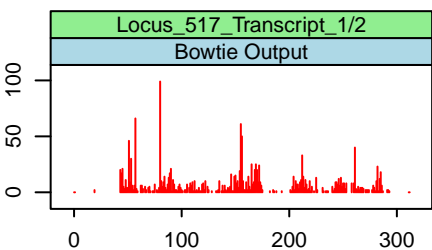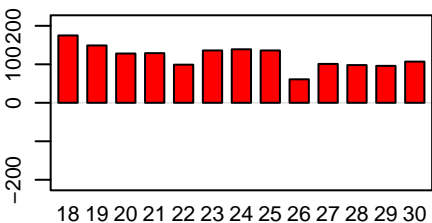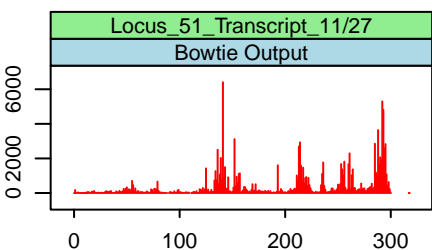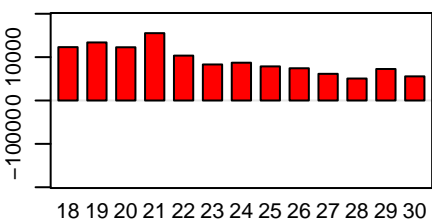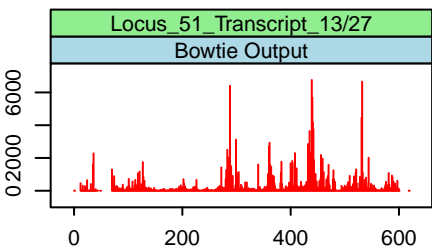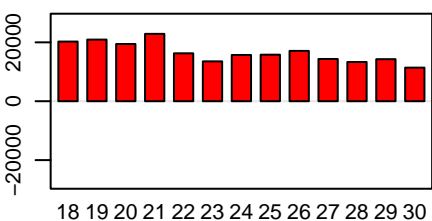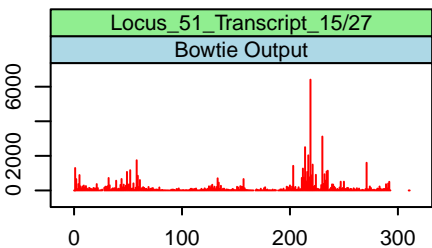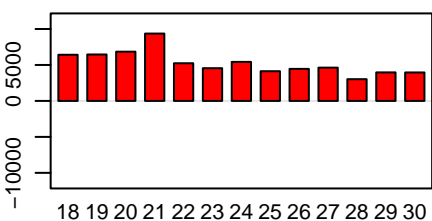

Coordinates/read size

# Readmaps and size distributions

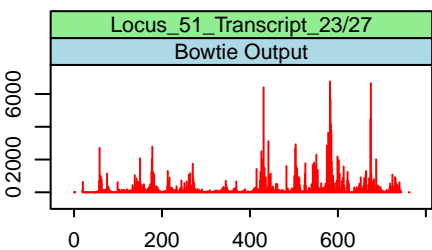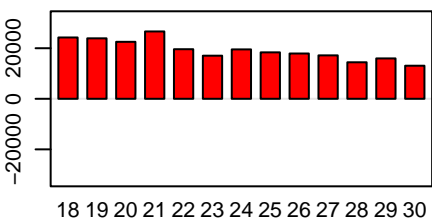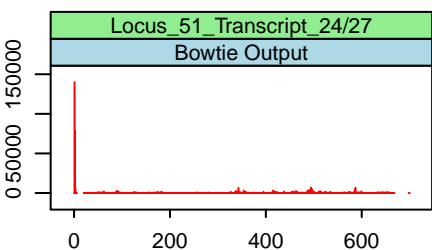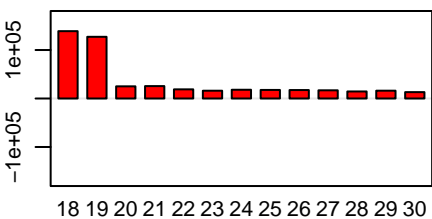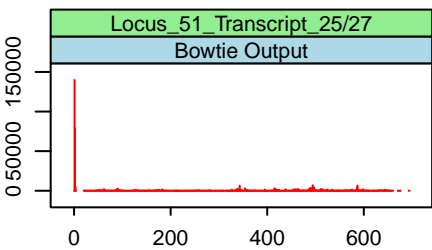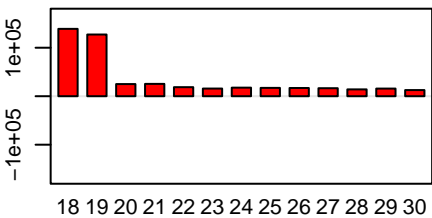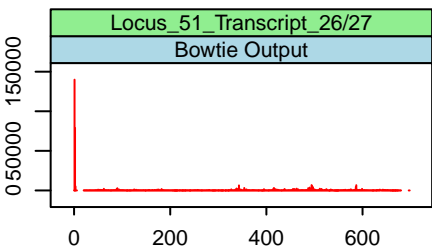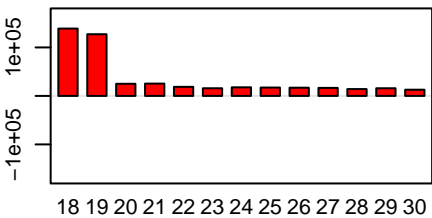

Coordinates/read size

# Readmaps and size distributions

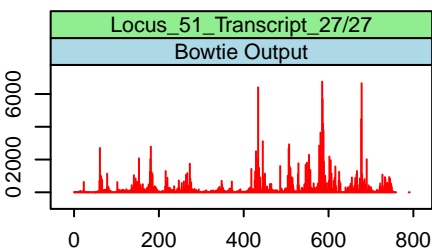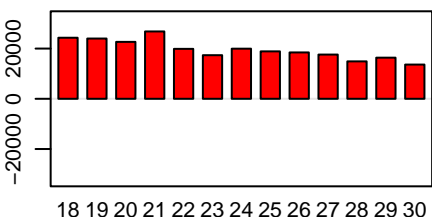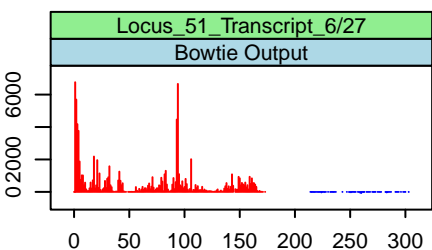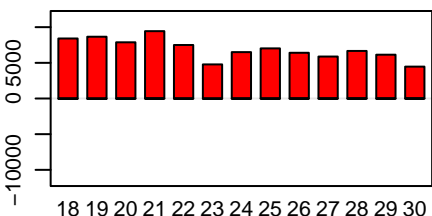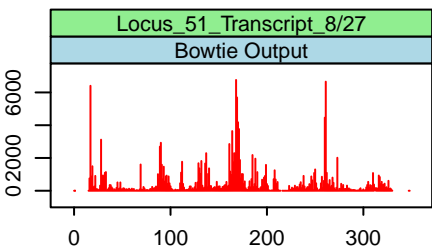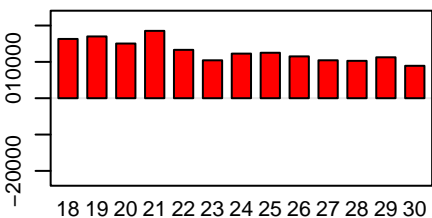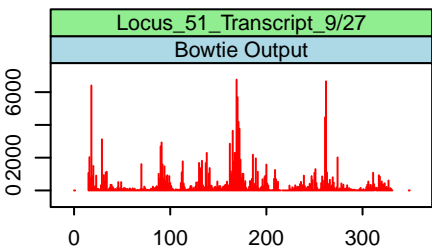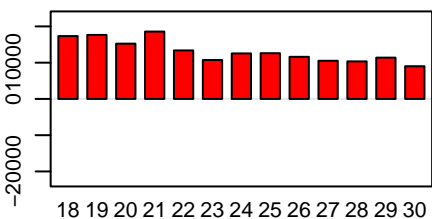

Coordinates/read size

# Readmaps and size distributions

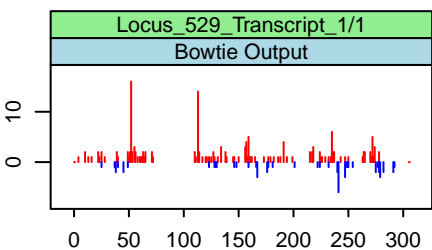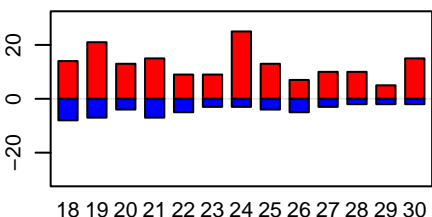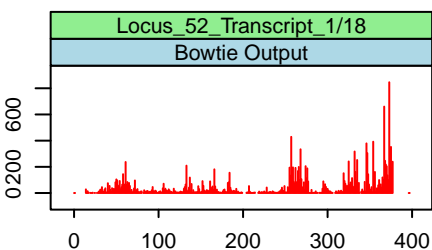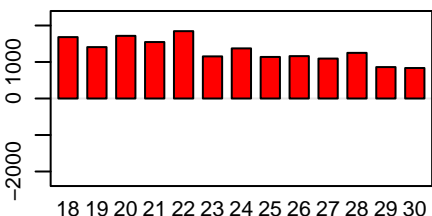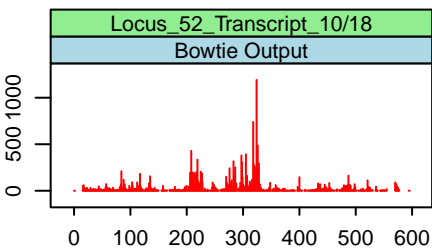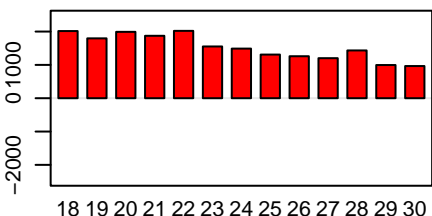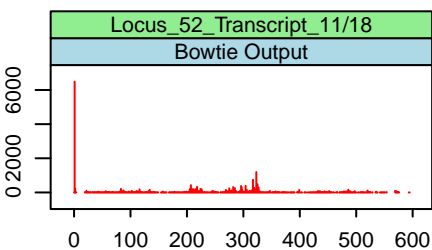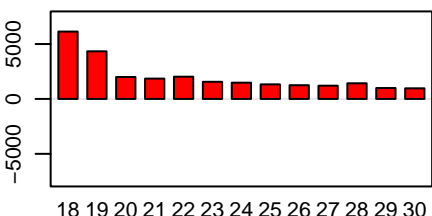

Coordinates/read size

Number of reads

# Readmaps and size distributions

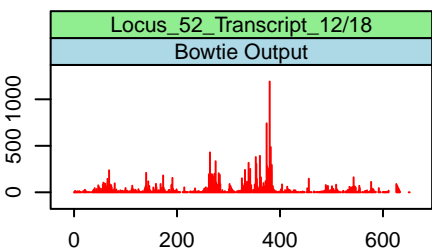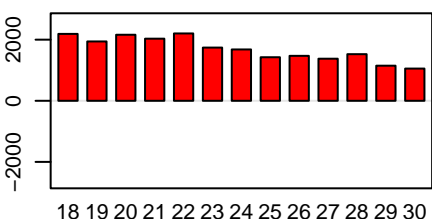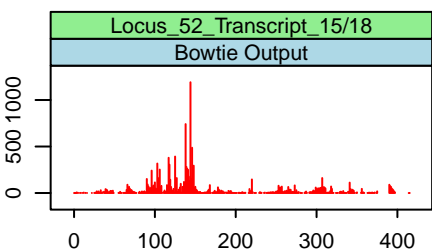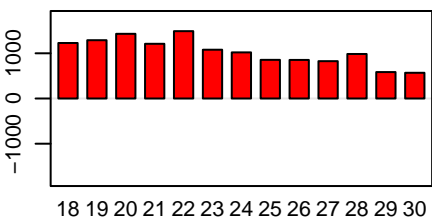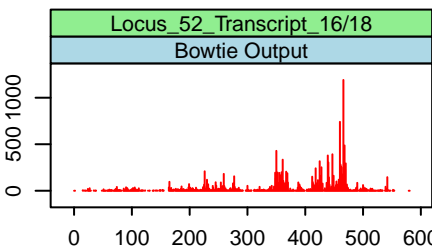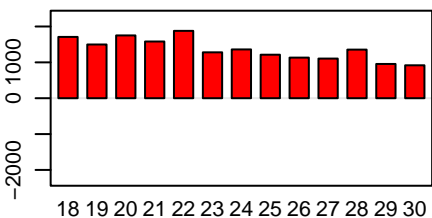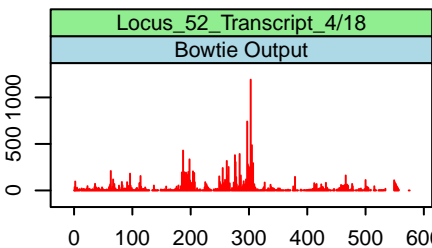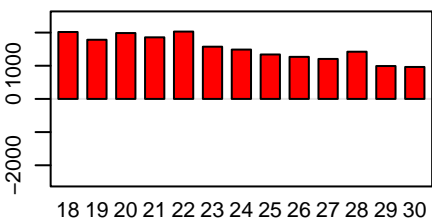

Coordinates/read size

# Readmaps and size distributions

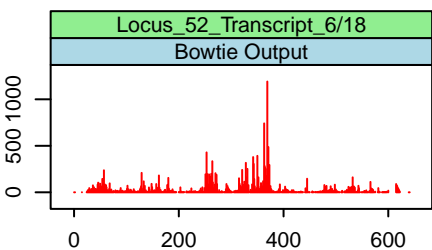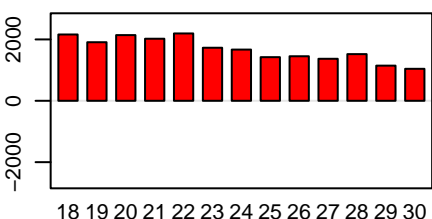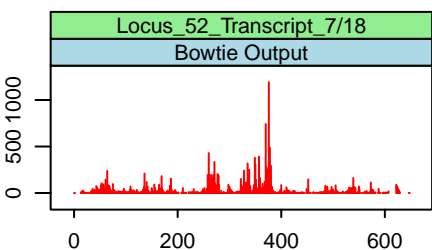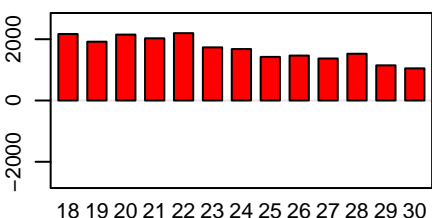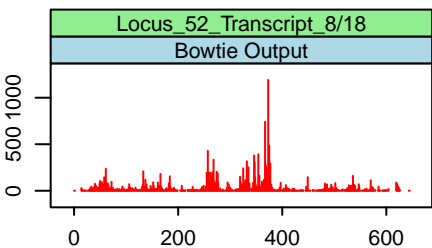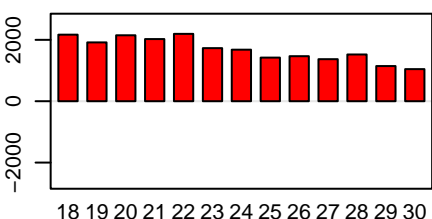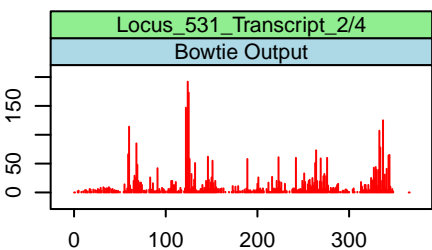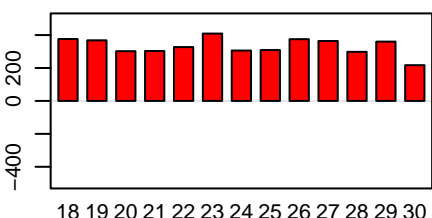

Coordinates/read size

# Readmaps and size distributions

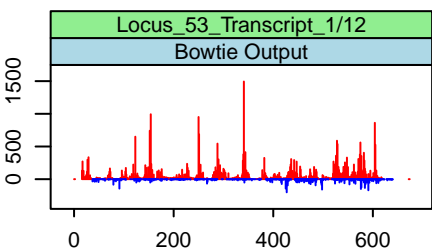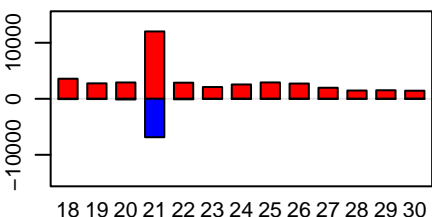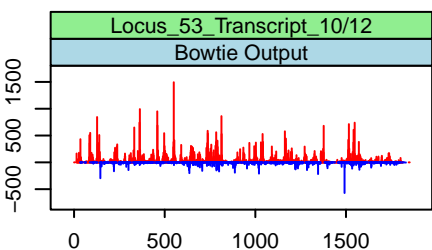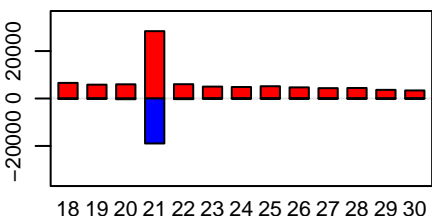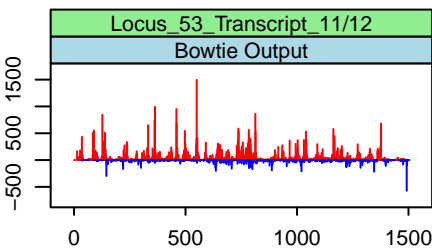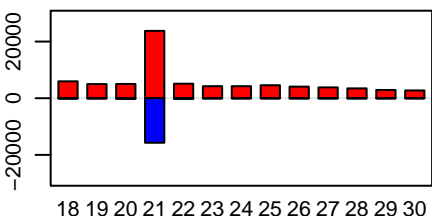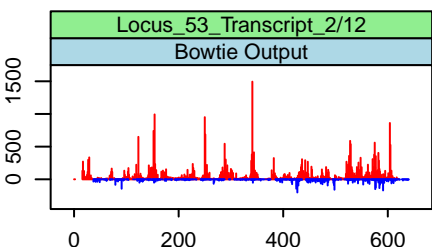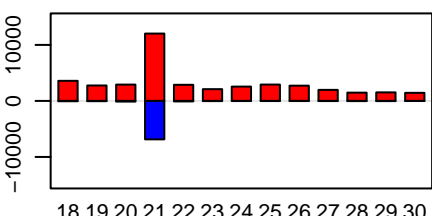

Coordinates/read size



# Readmaps and size distributions

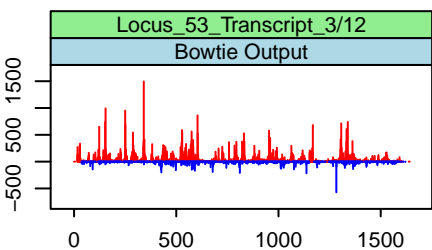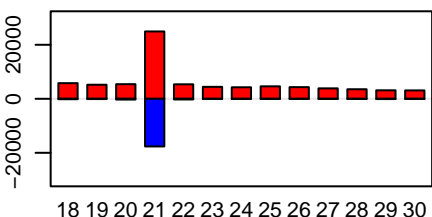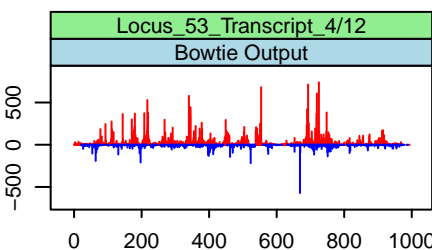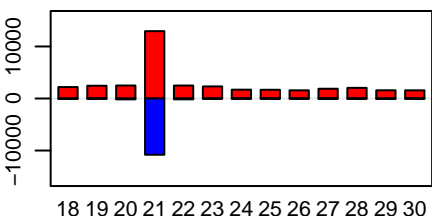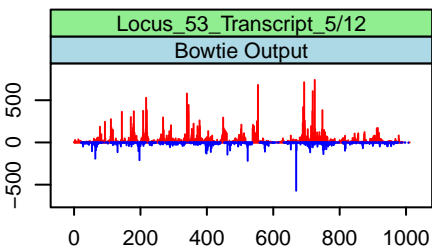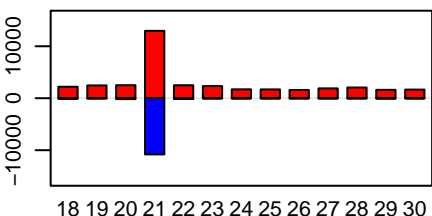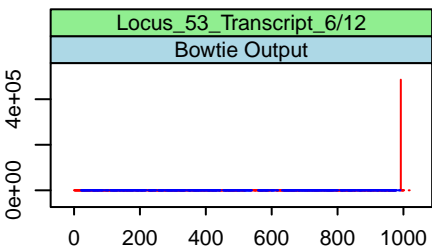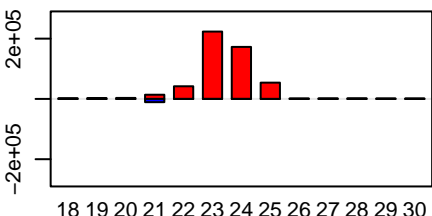

Coordinates/read size

Number of reads

# Readmaps and size distributions

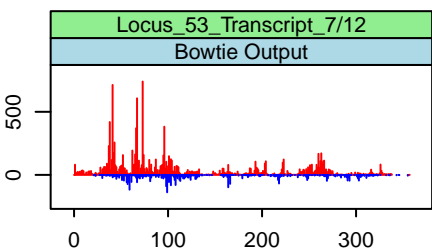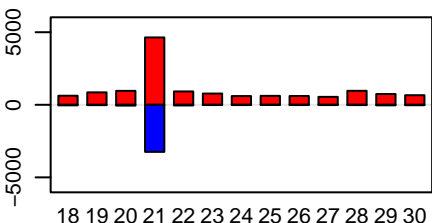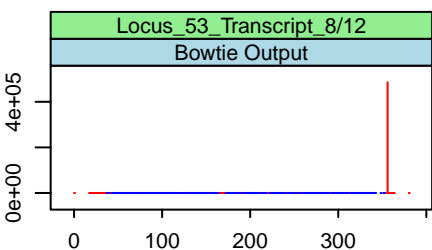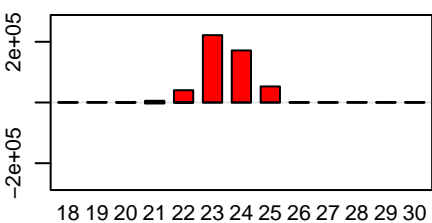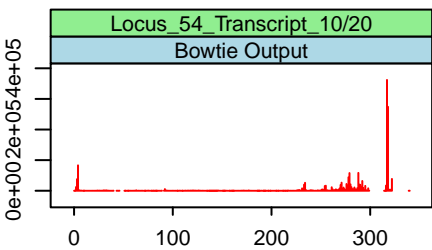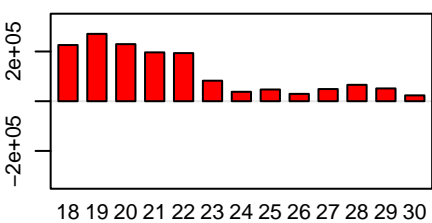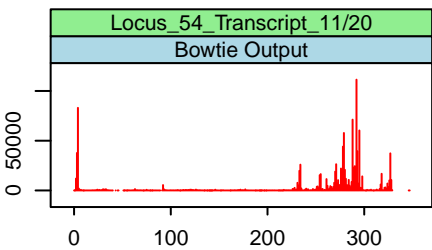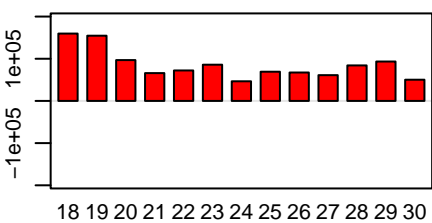

Number of reads

Coordinates/read size

# Readmaps and size distributions

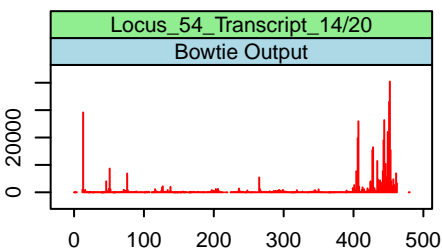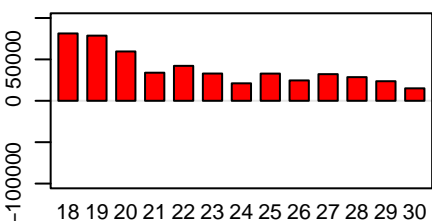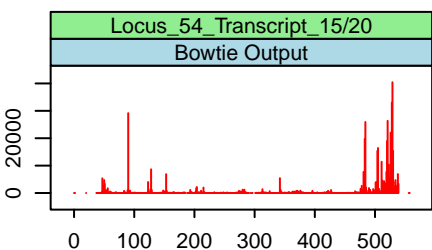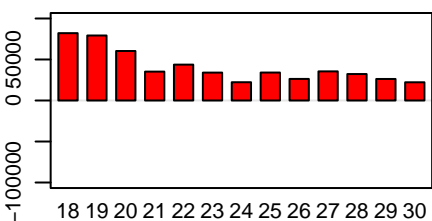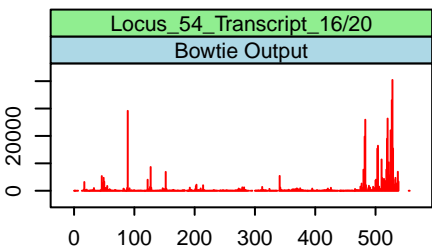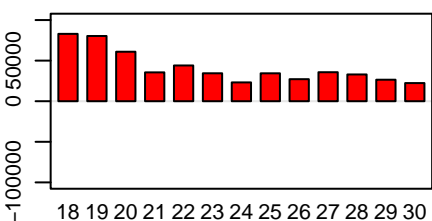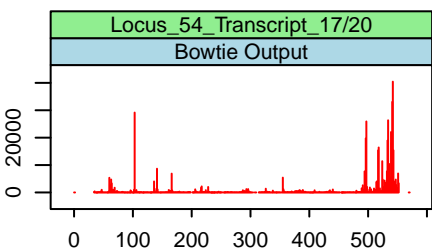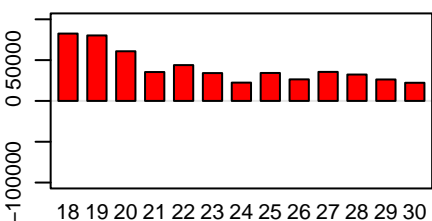

Coordinates/read size

# Readmaps and size distributions

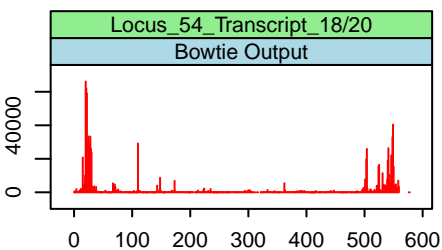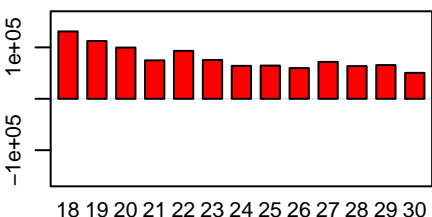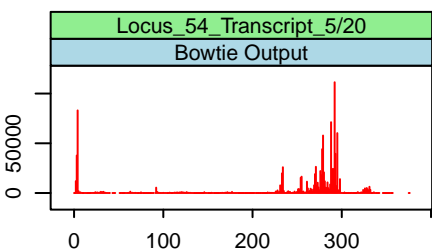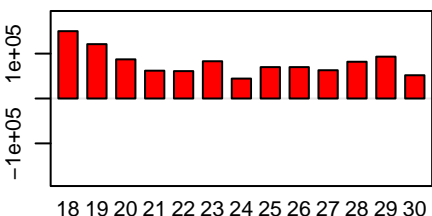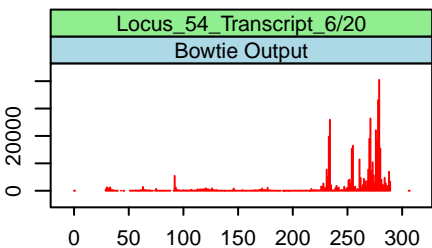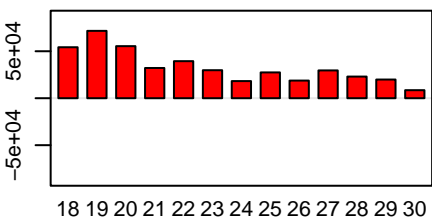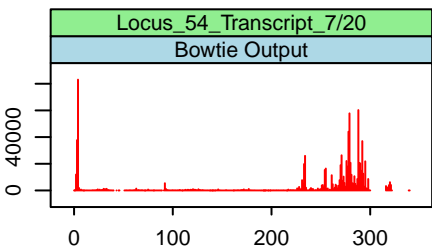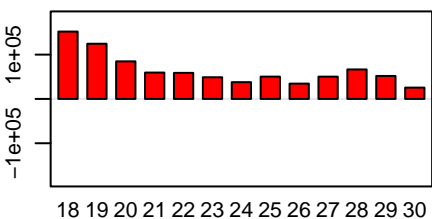

Coordinates/read size

# Readmaps and size distributions

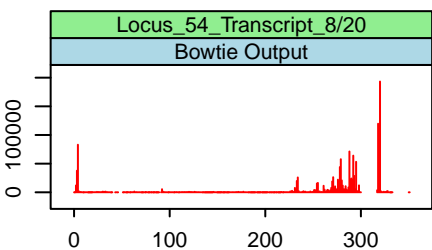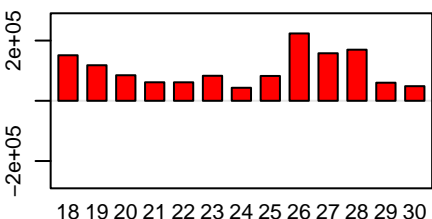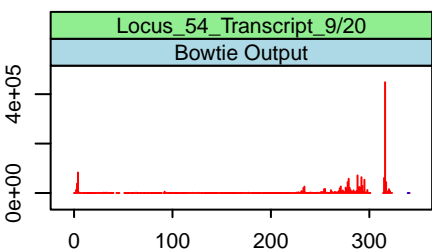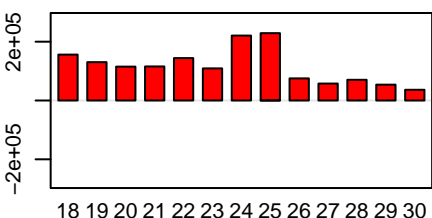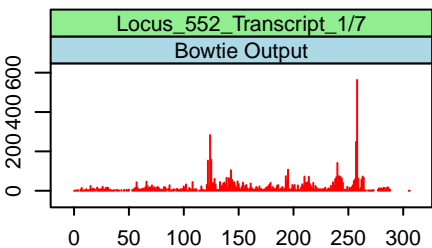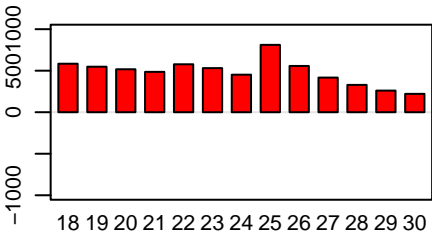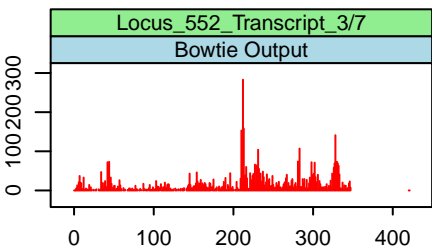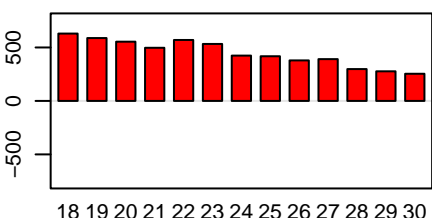

Coordinates/read size

# Readmaps and size distributions

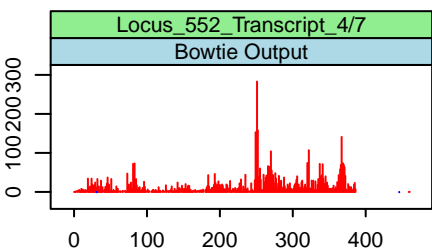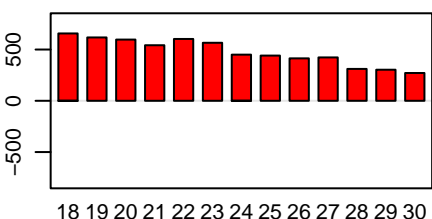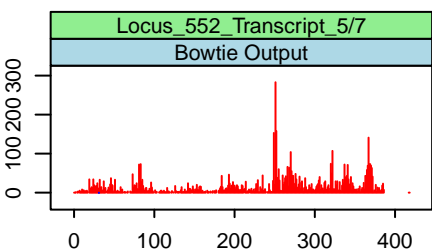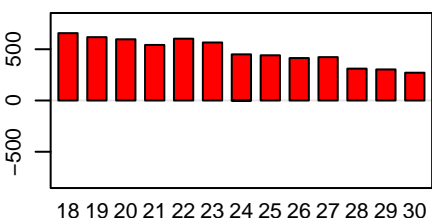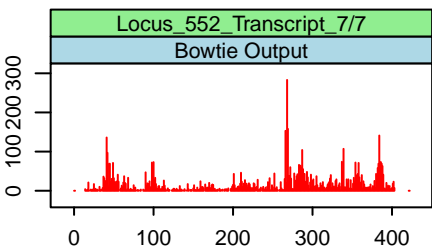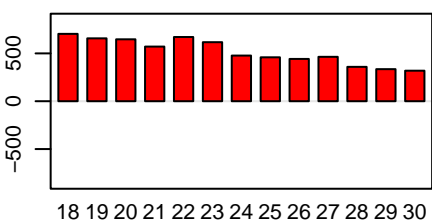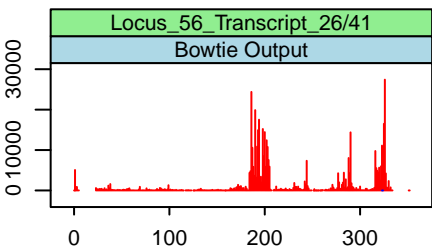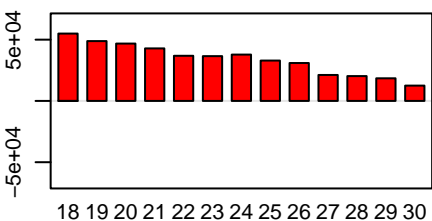

Coordinates/read size

# Readmaps and size distributions

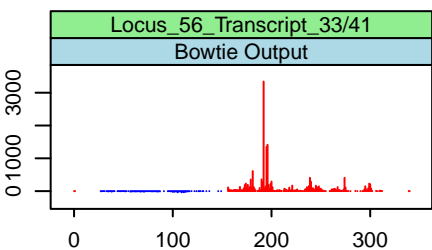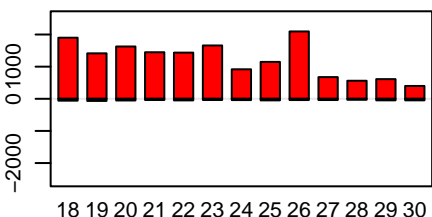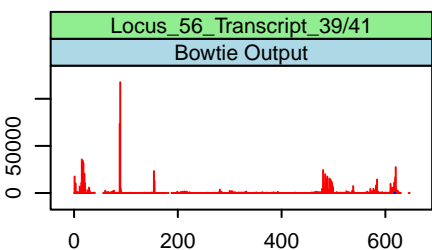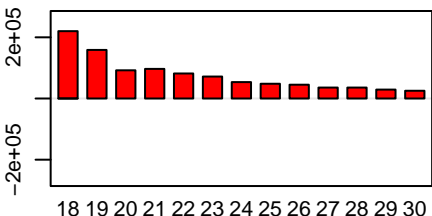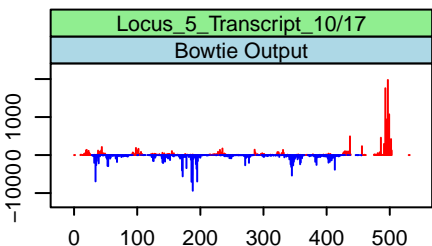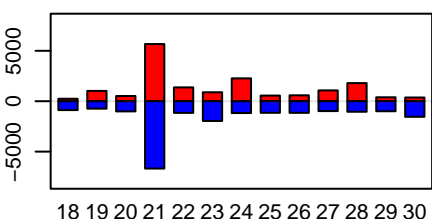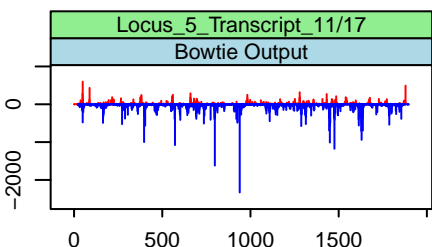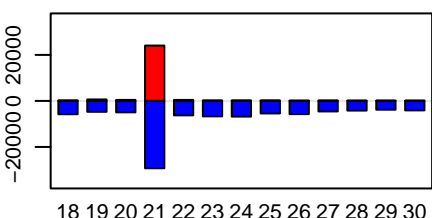

Coordinates/read size

# Readmaps and size distributions

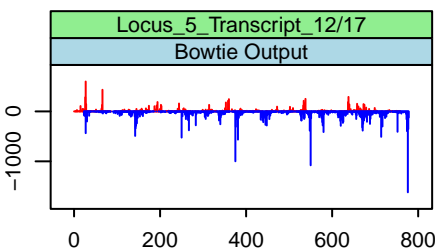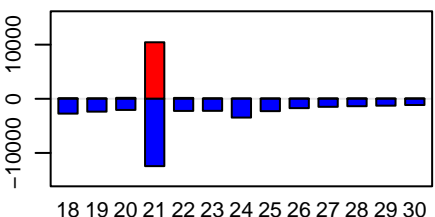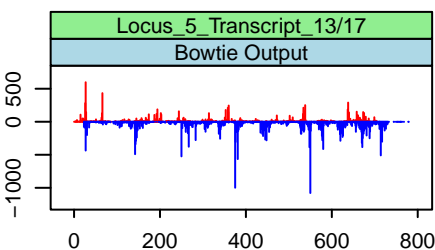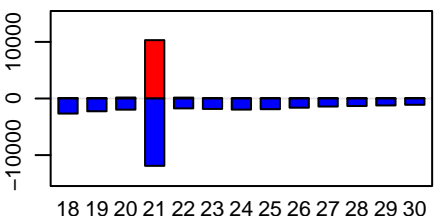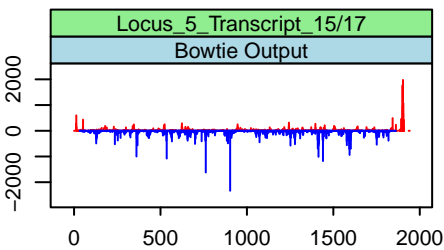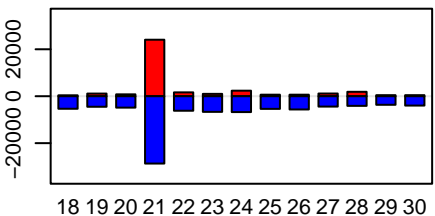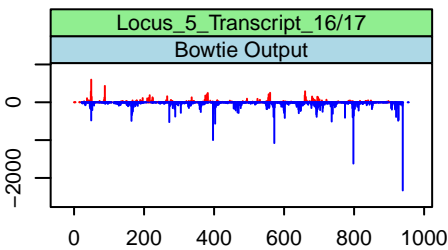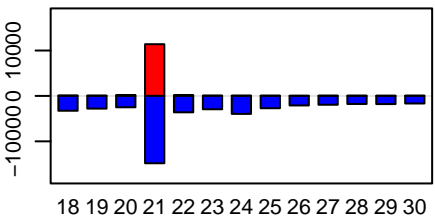

Coordinates/read size

Number of reads



# Readmaps and size distributions

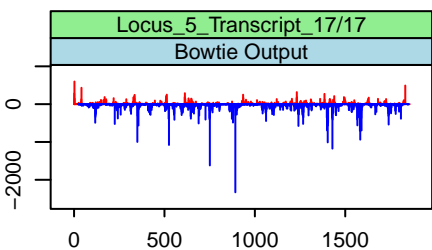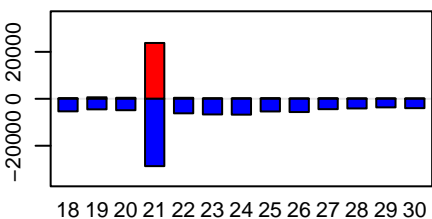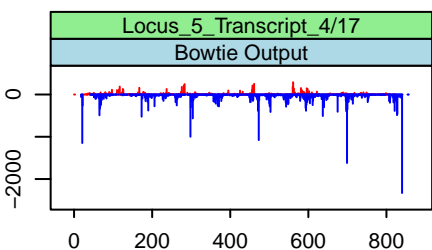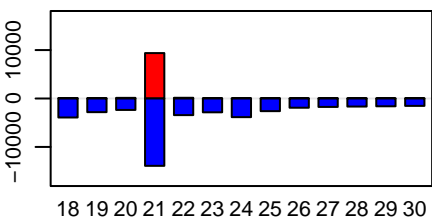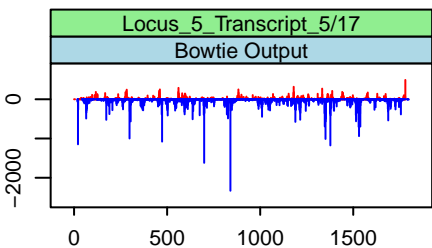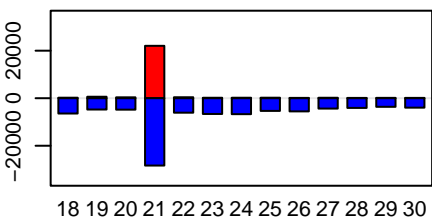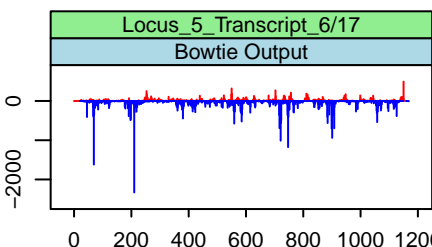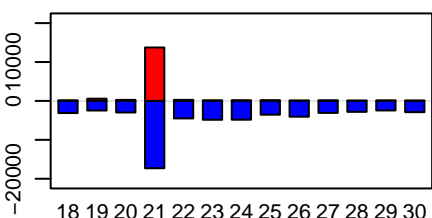

Coordinates/read size

# Readmaps and size distributions

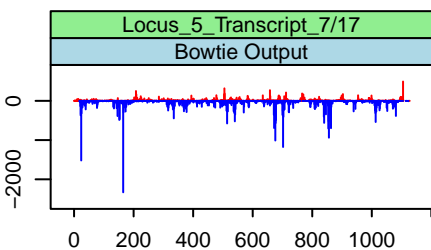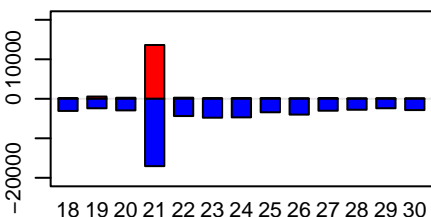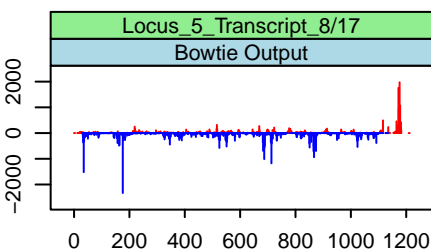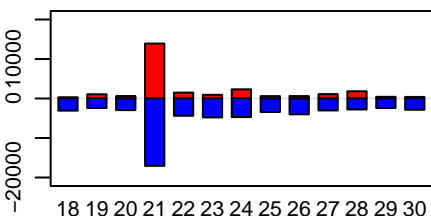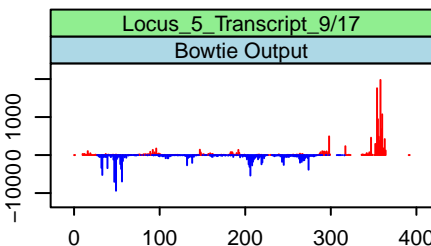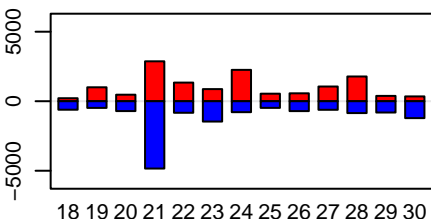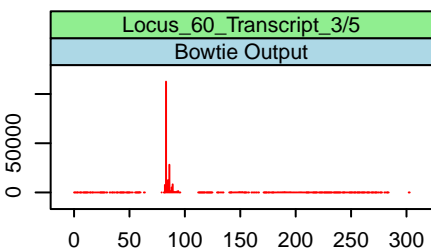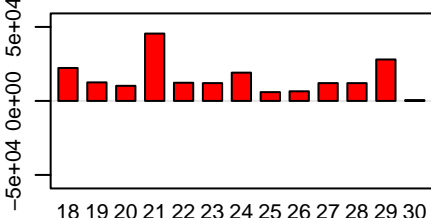

Coordinates/read size

Number of reads

# Readmaps and size distributions

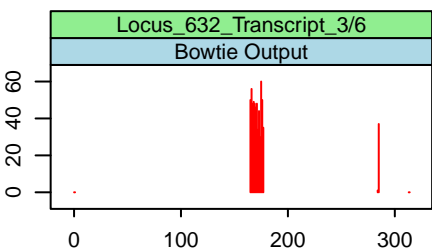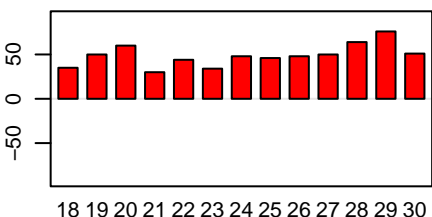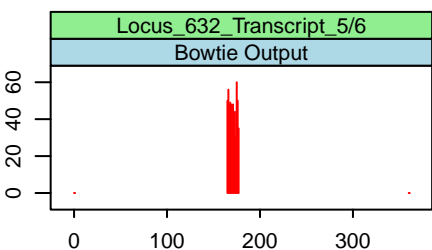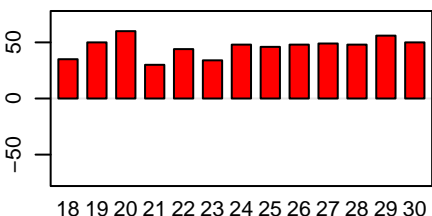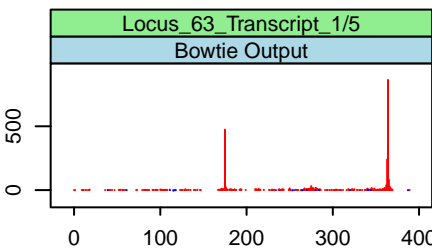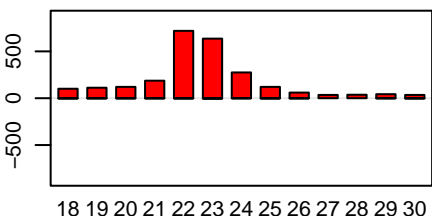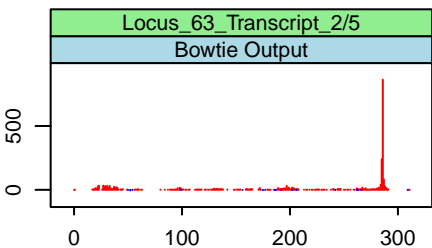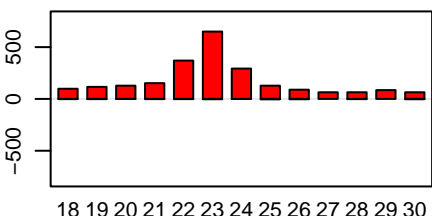

Coordinates/read size

# Readmaps and size distributions

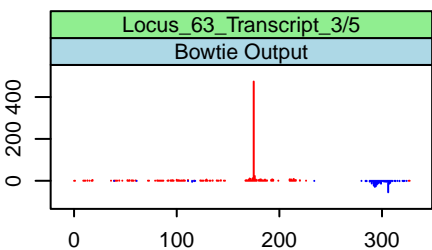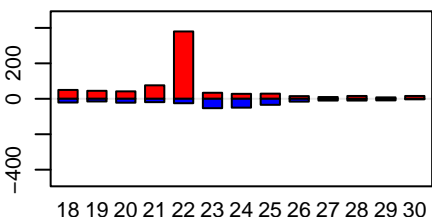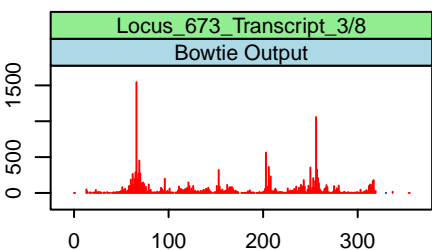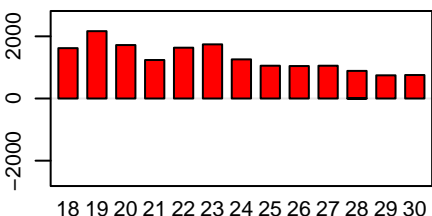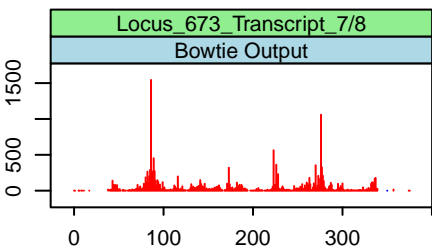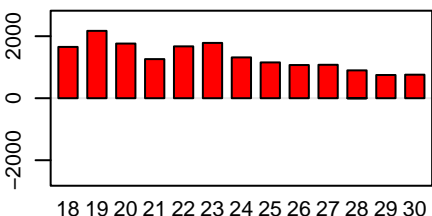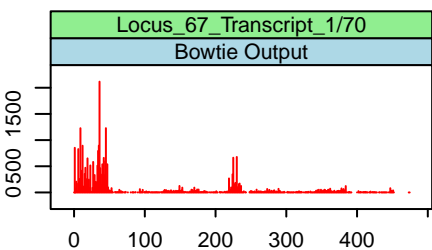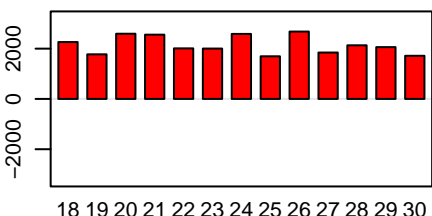

Coordinates/read size

# Readmaps and size distributions

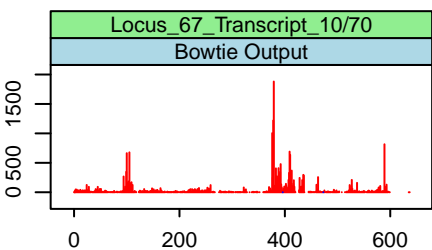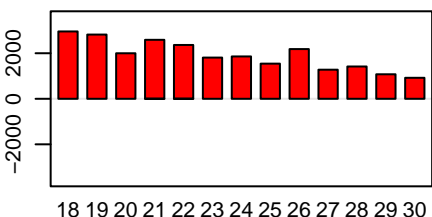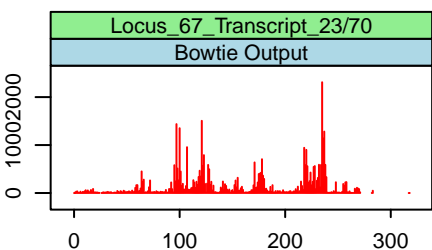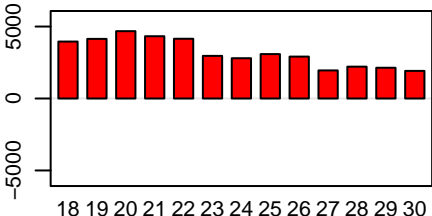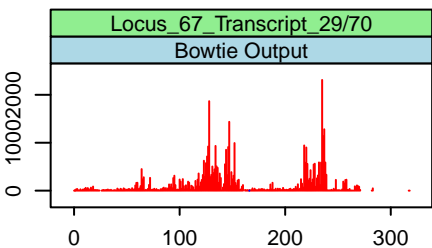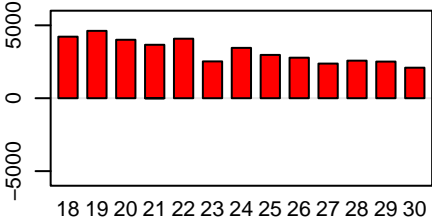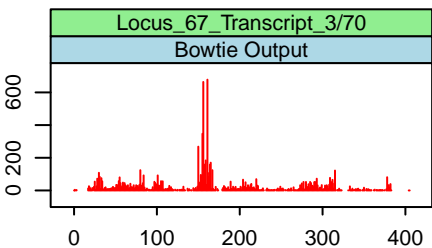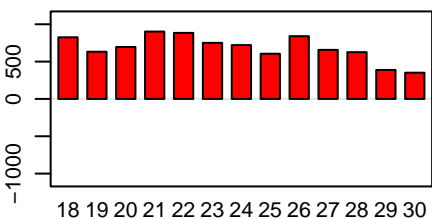

Coordinates/read size

# Readmaps and size distributions

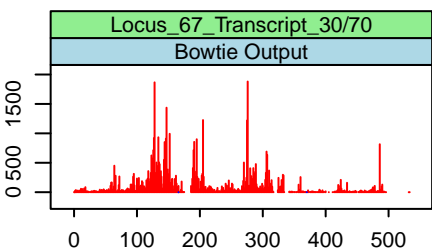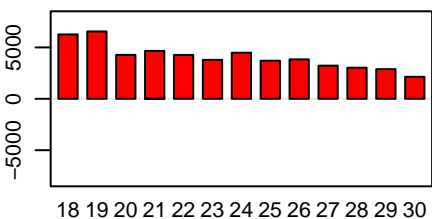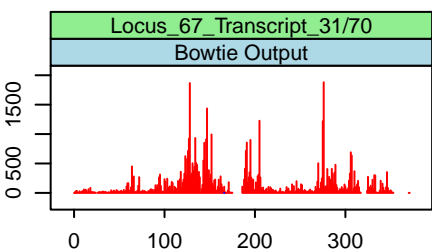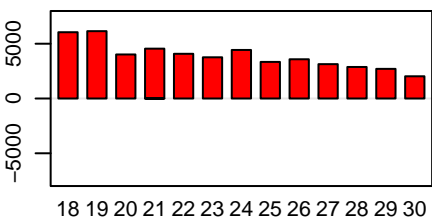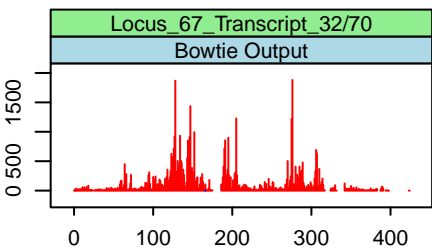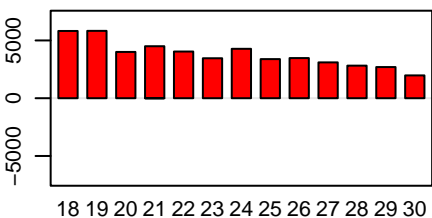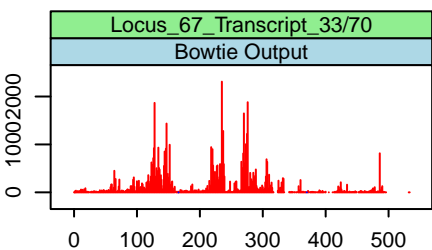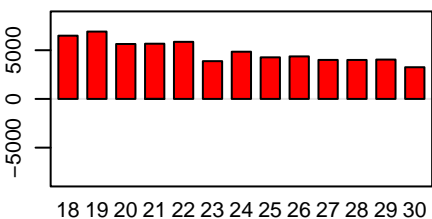

Coordinates/read size

# Readmaps and size distributions

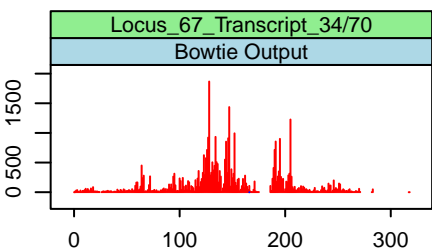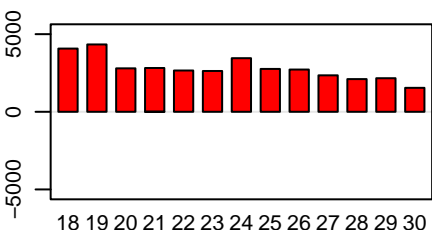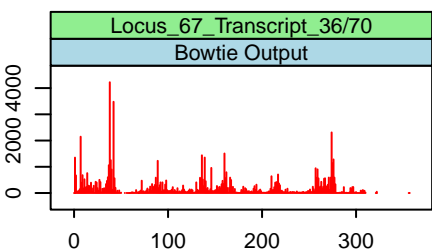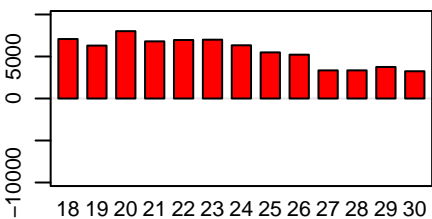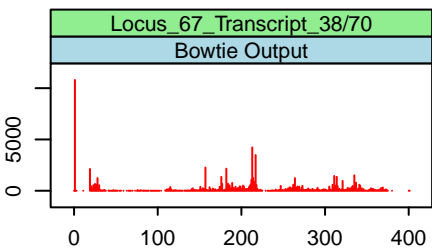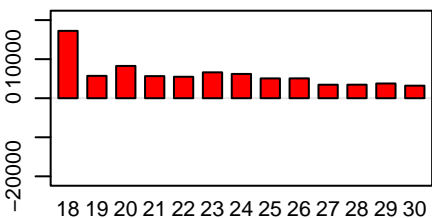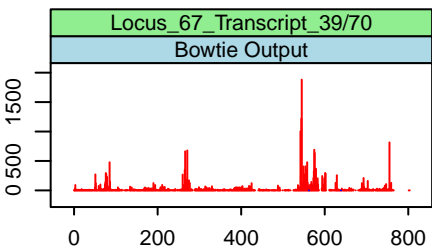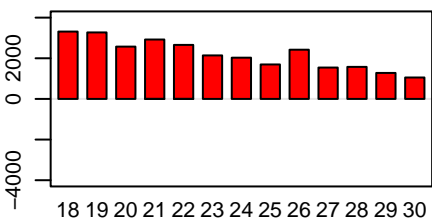

Coordinates/read size

# Readmaps and size distributions

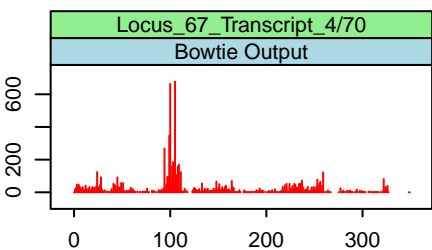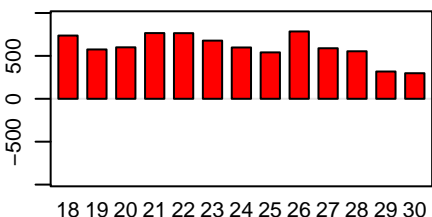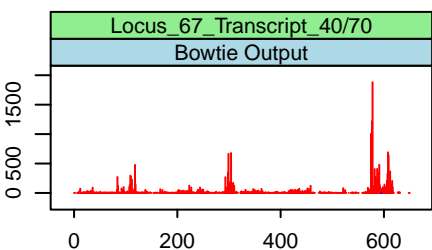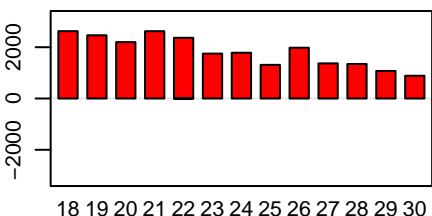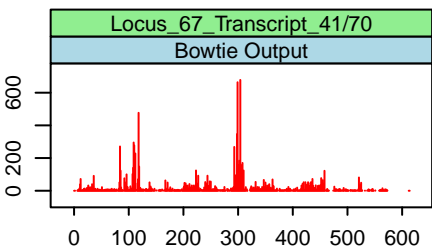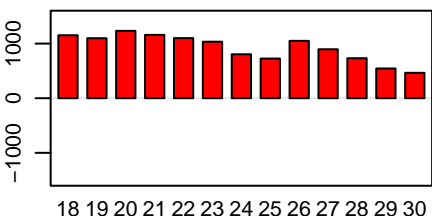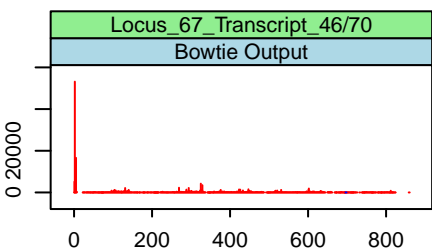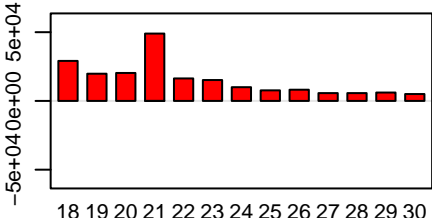

Coordinates/read size



# Readmaps and size distributions

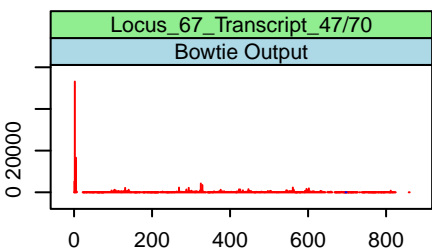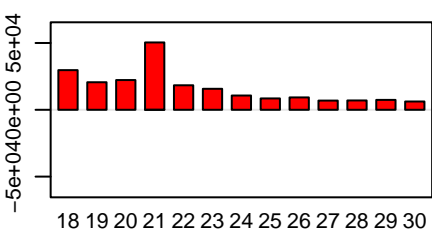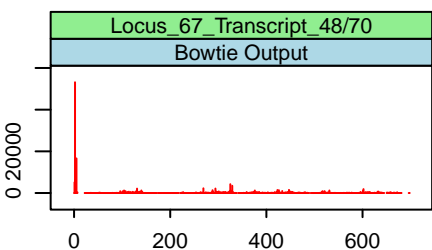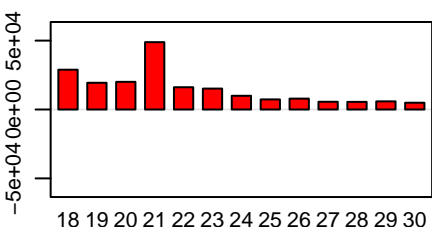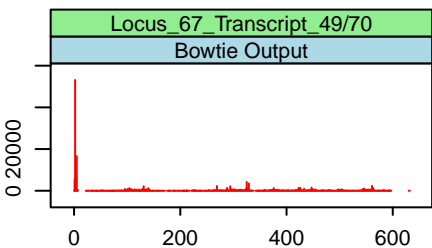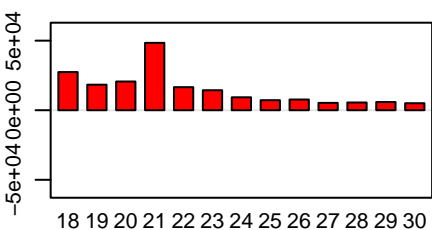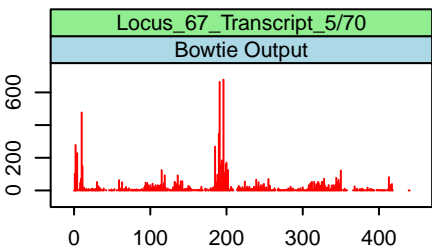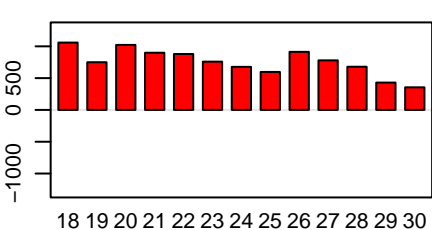

Coordinates/read size

# Readmaps and size distributions

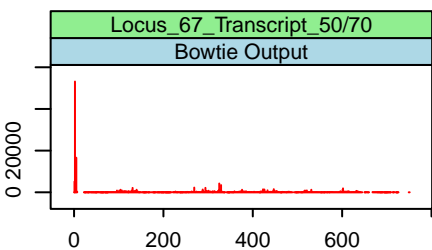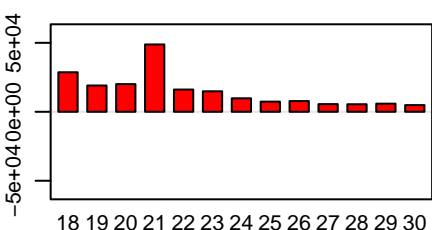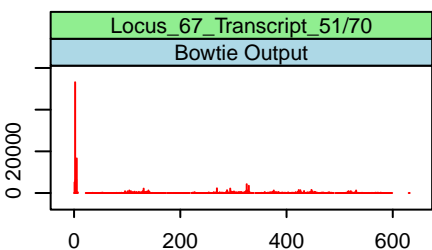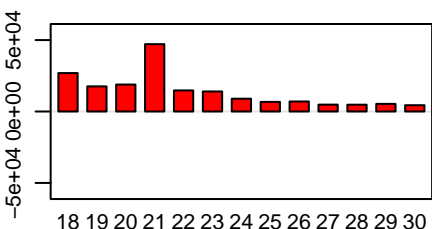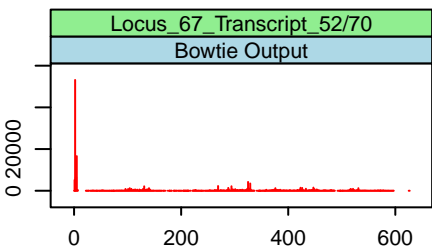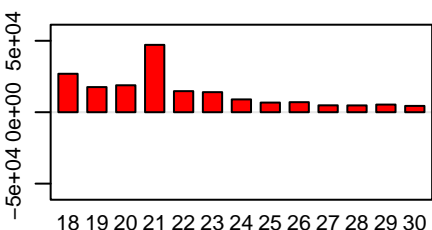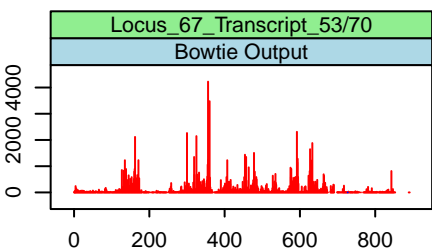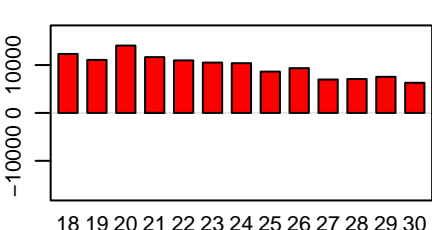

Coordinates/read size

# Readmaps and size distributions

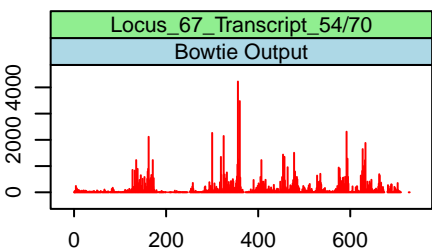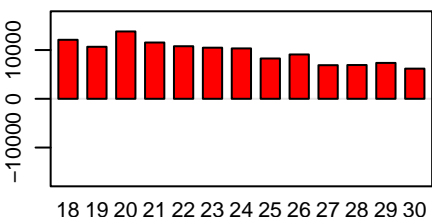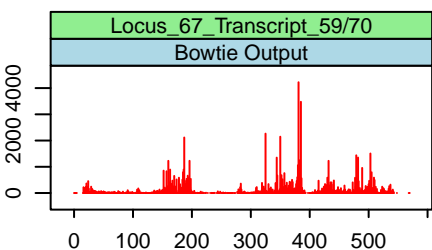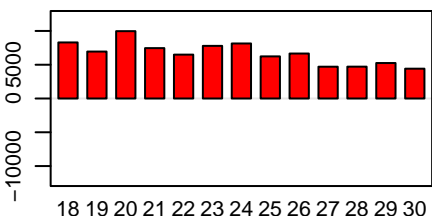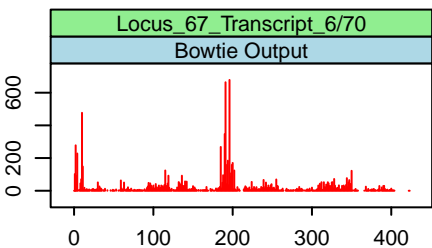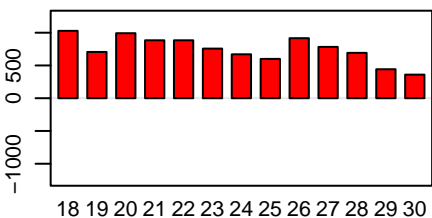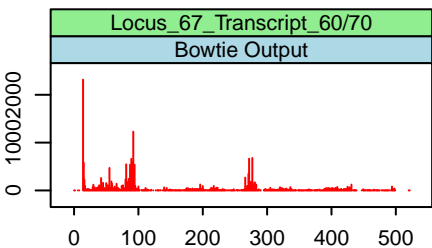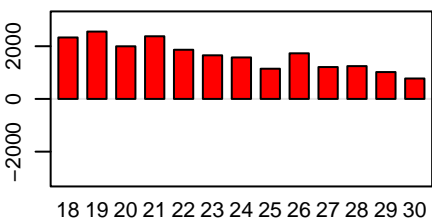

Coordinates/read size

Number of reads

# Readmaps and size distributions

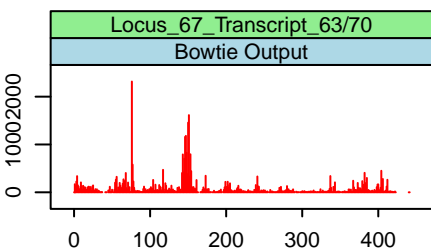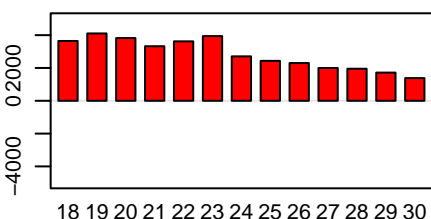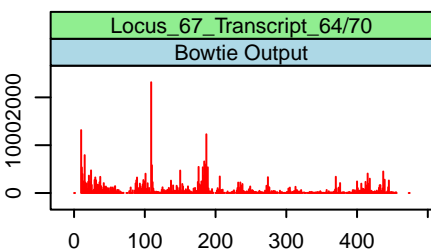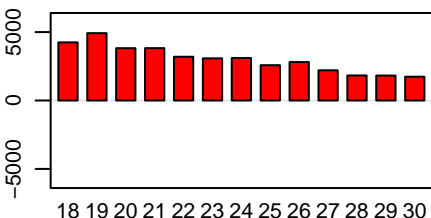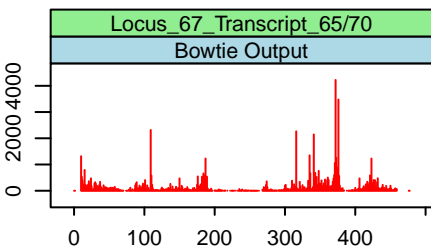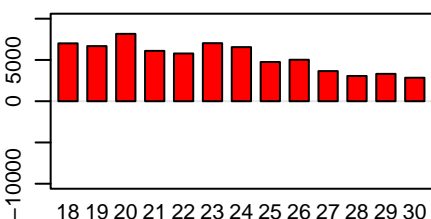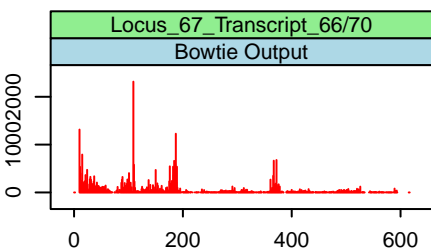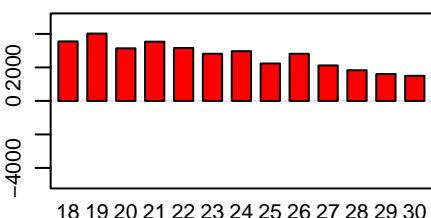

Coordinates/read size

# Readmaps and size distributions

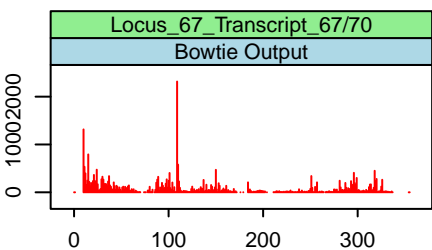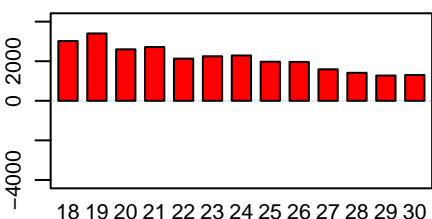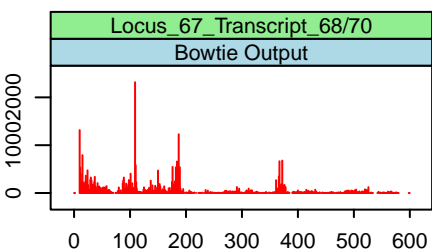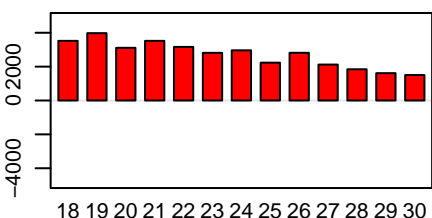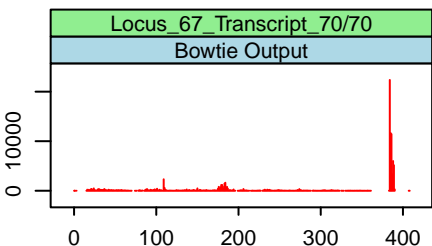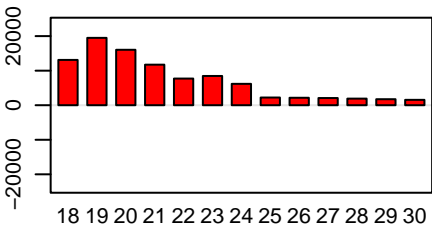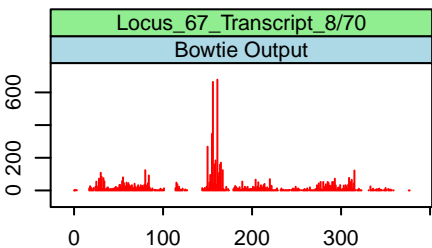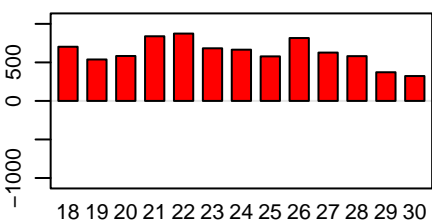

Coordinates/read size

# Readmaps and size distributions

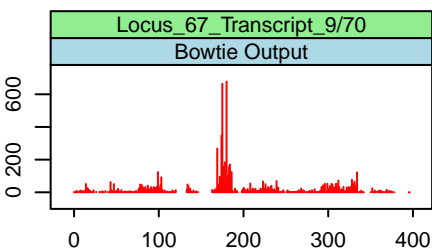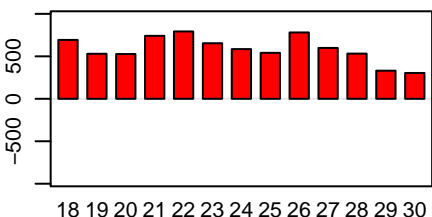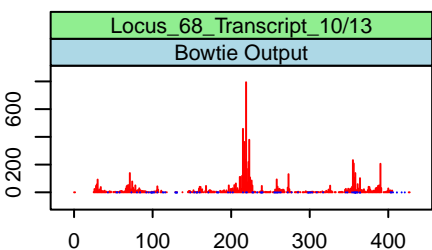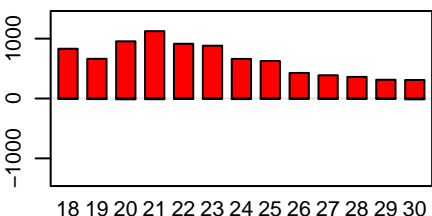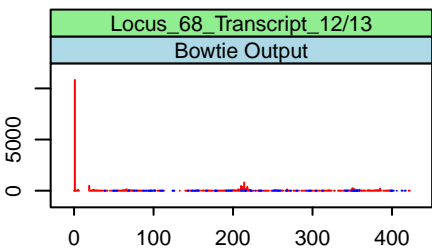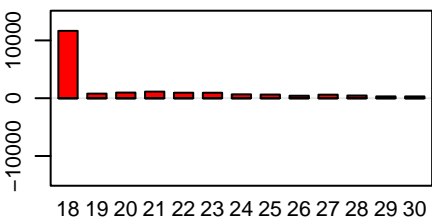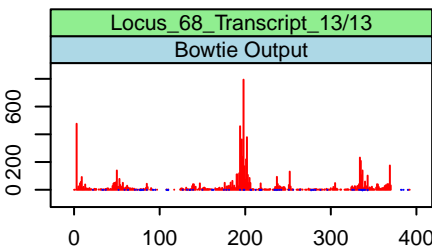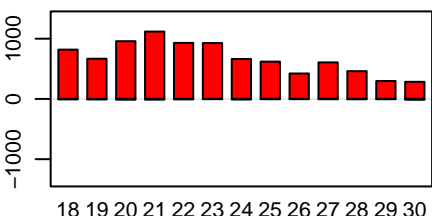

Coordinates/read size

# Readmaps and size distributions

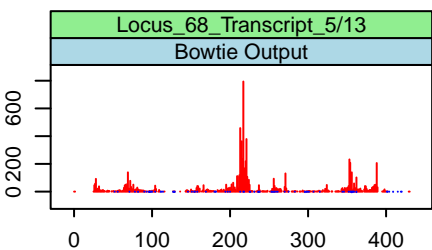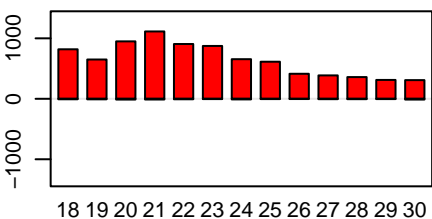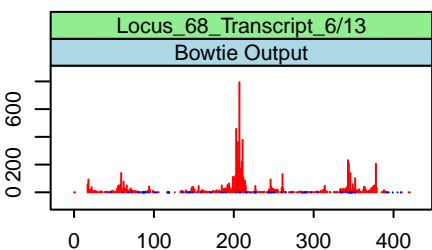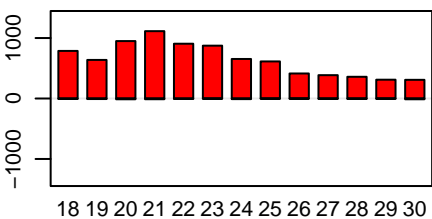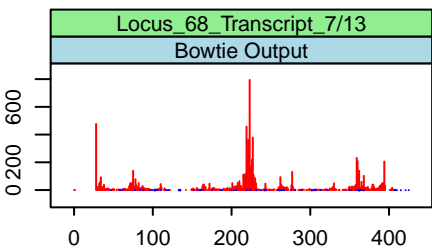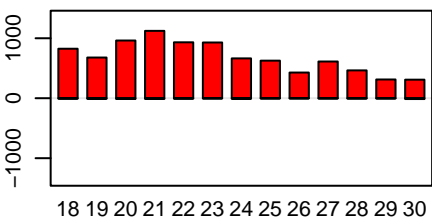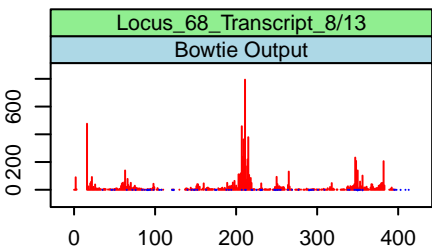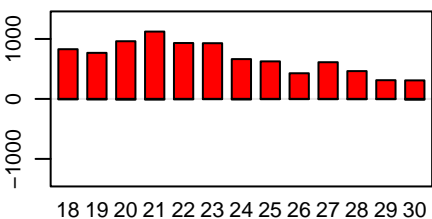

Coordinates/read size

# Readmaps and size distributions

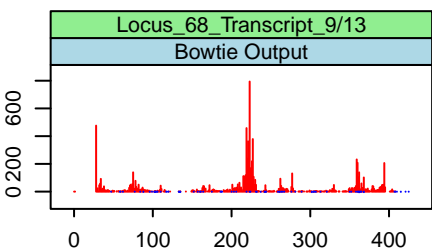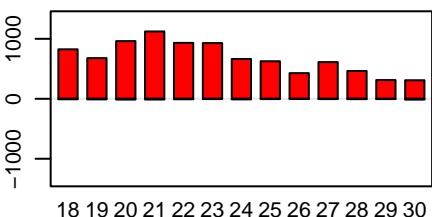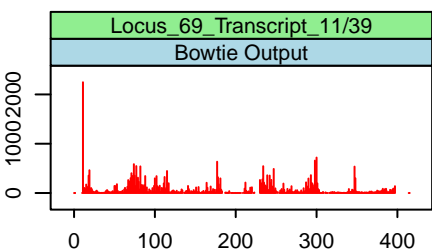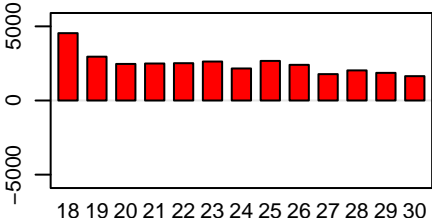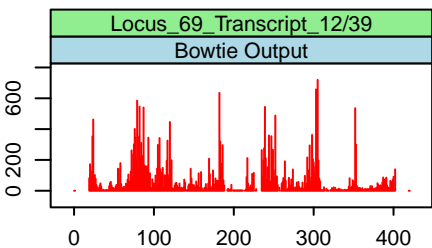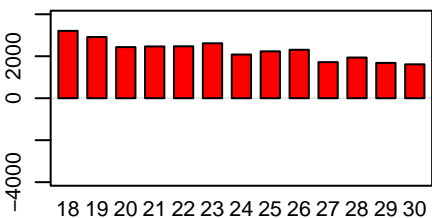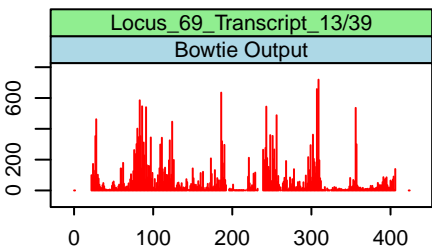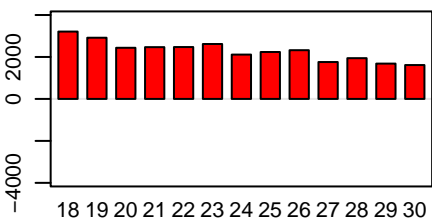

Coordinates/read size



# Readmaps and size distributions

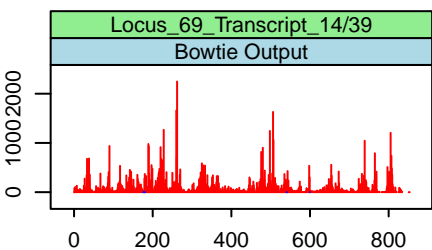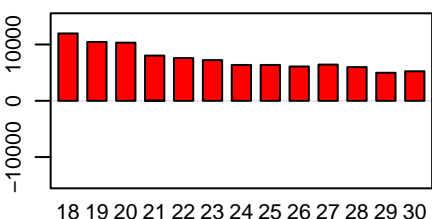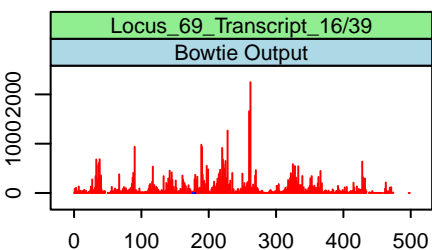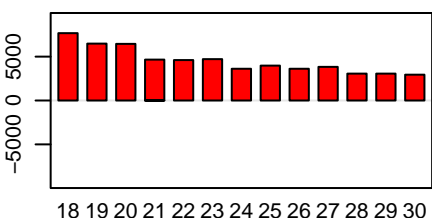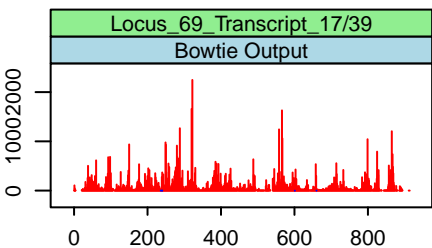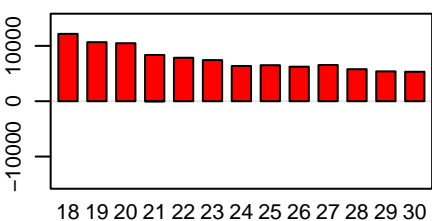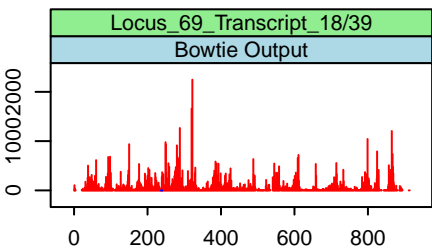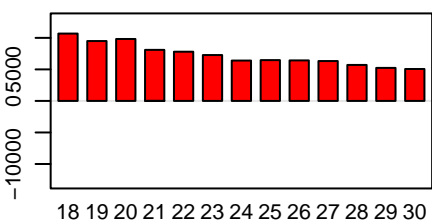

Coordinates/read size

# Readmaps and size distributions

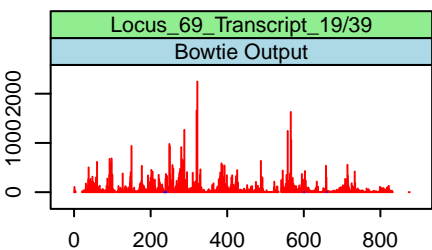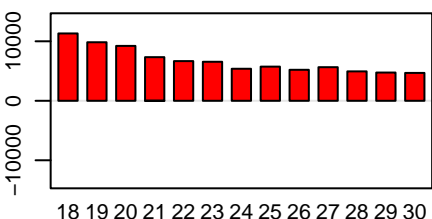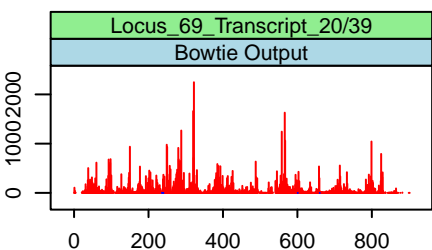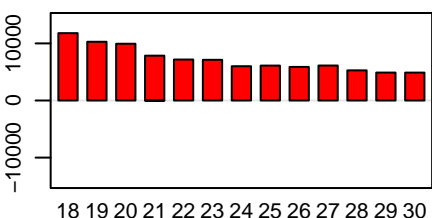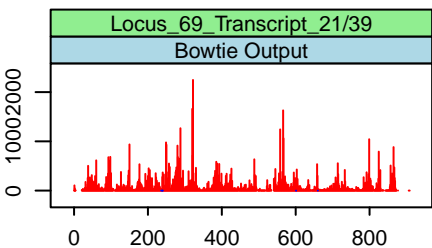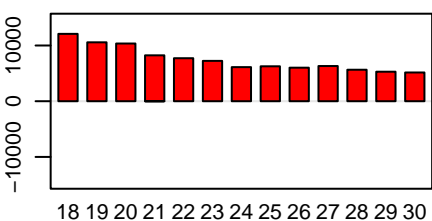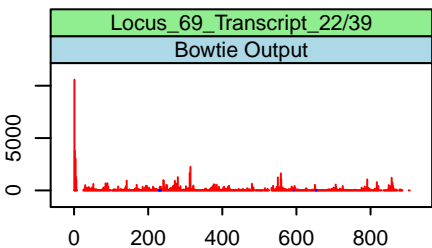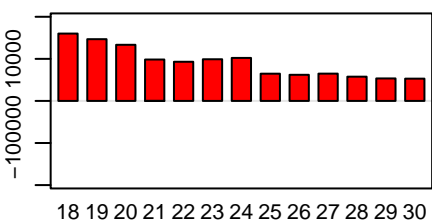

Coordinates/read size

# Readmaps and size distributions

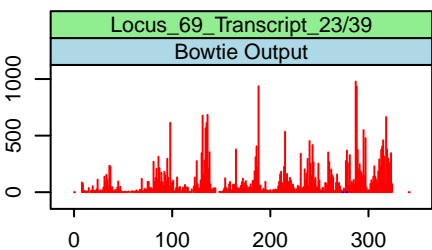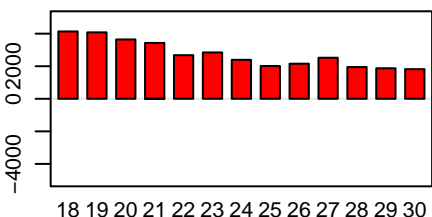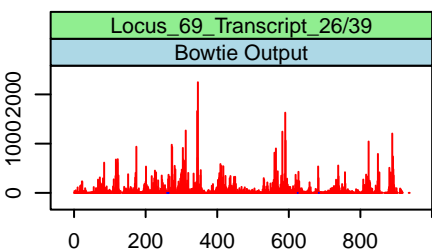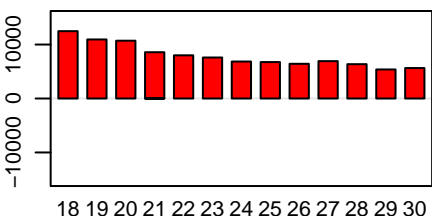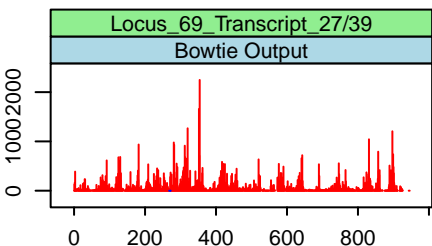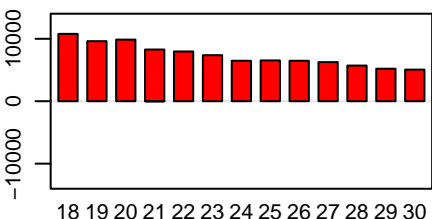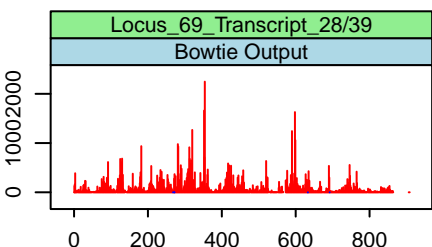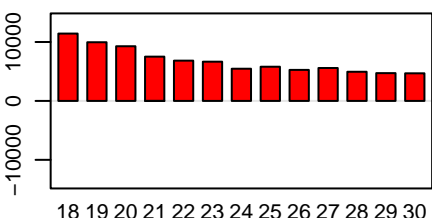

Coordinates/read size

# Readmaps and size distributions

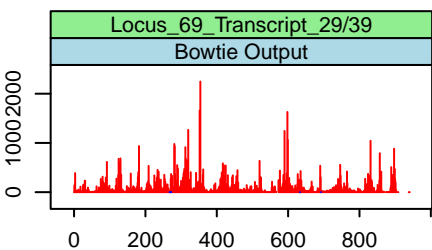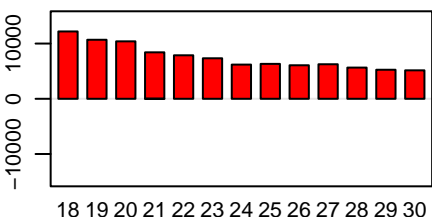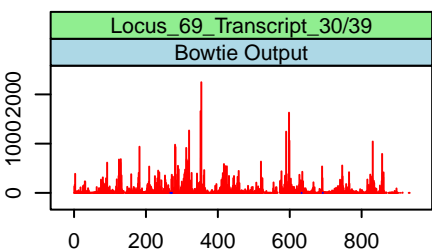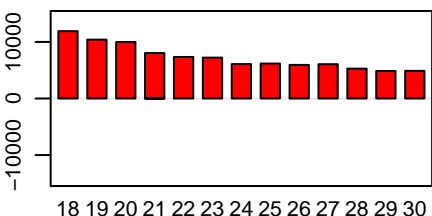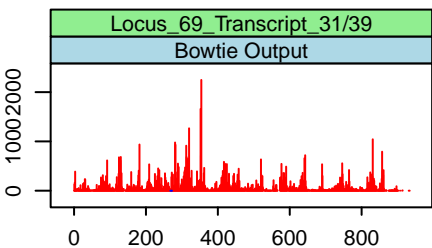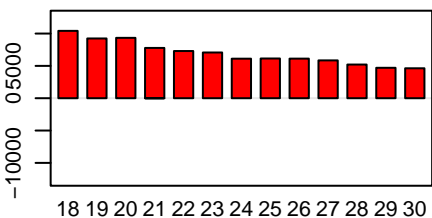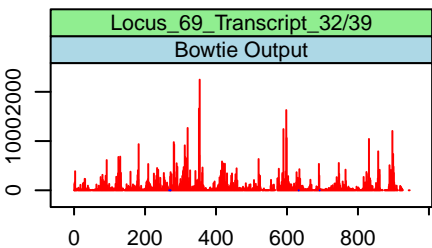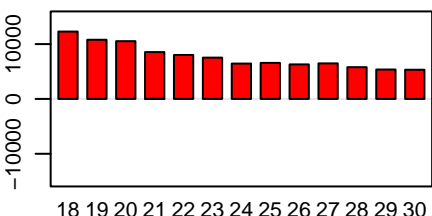

Coordinates/read size

# Readmaps and size distributions

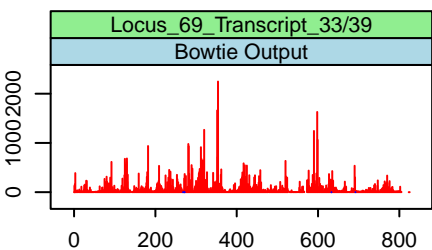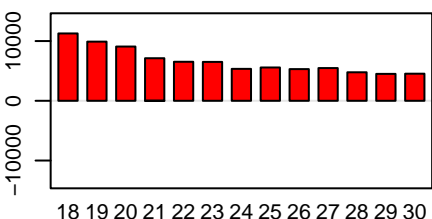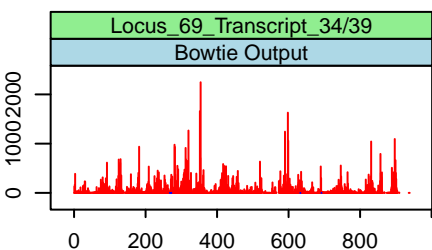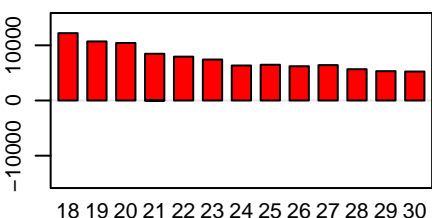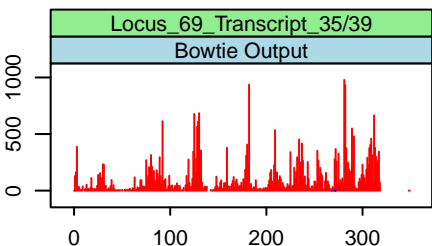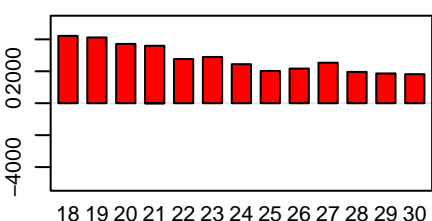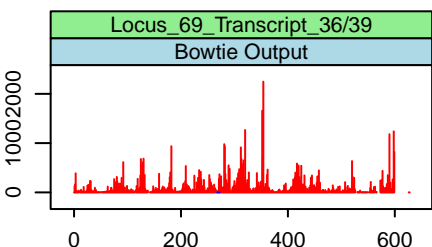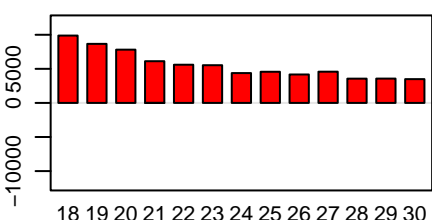

Coordinates/read size

# Readmaps and size distributions

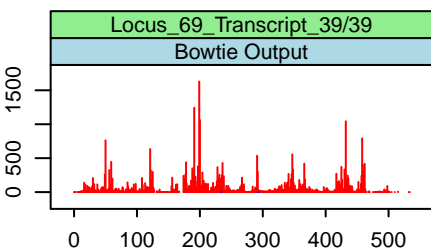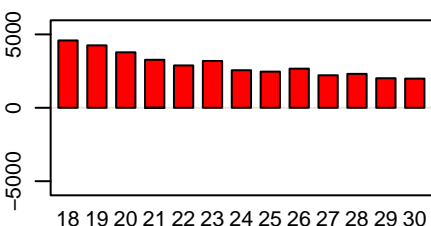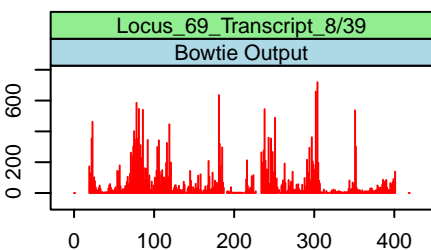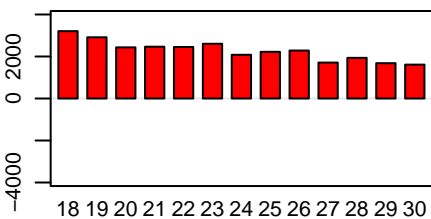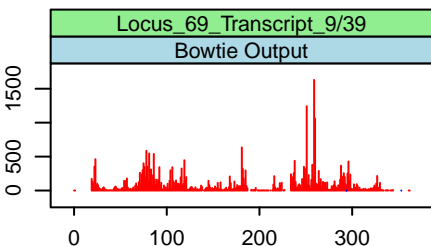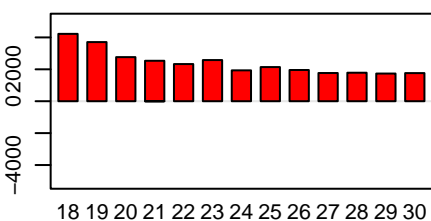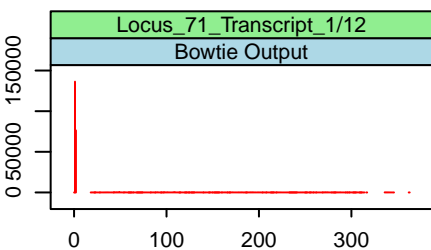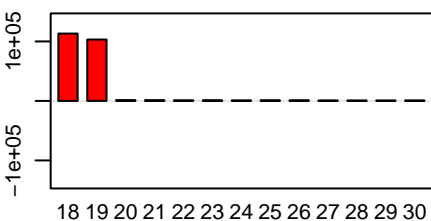

Coordinates/read size

# Readmaps and size distributions

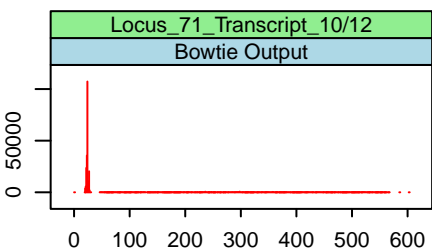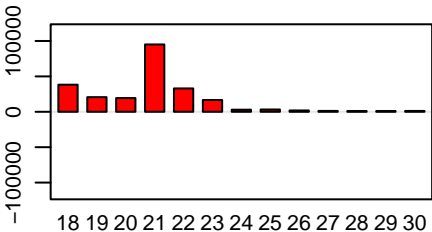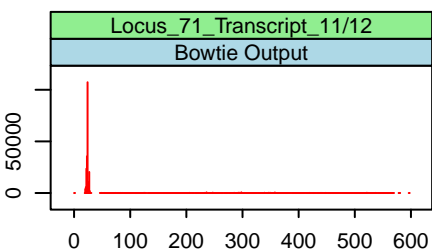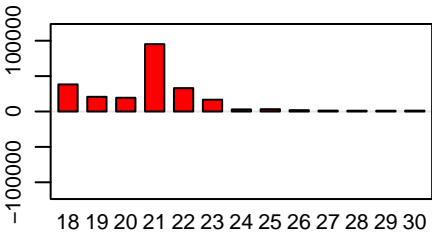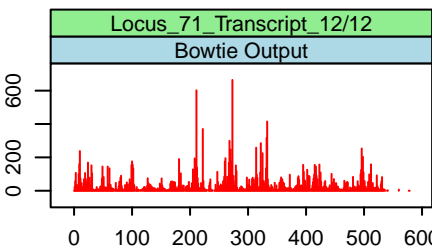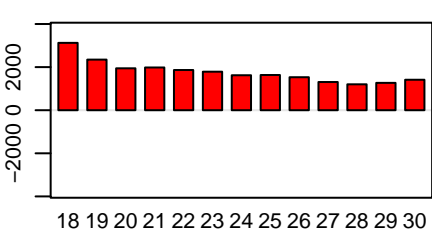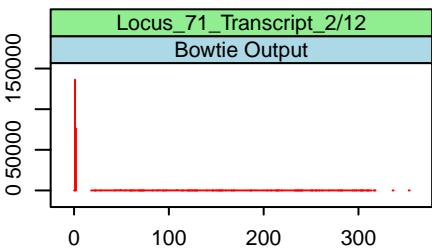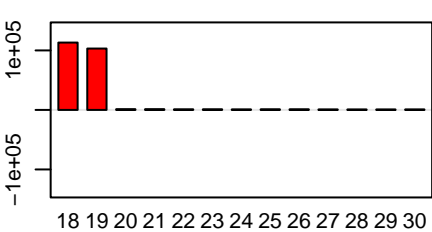

Coordinates/read size

# Readmaps and size distributions

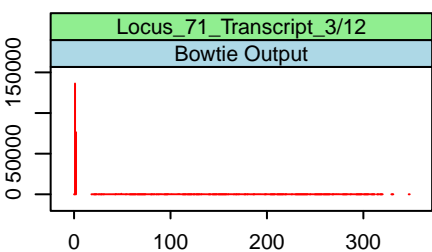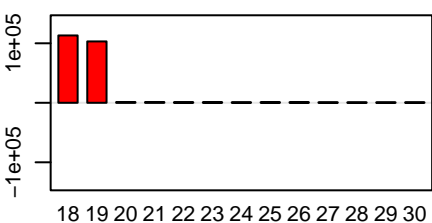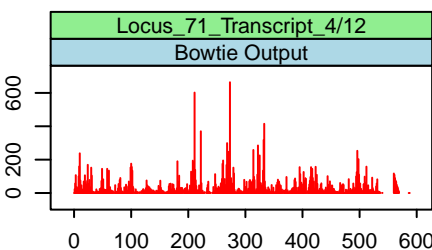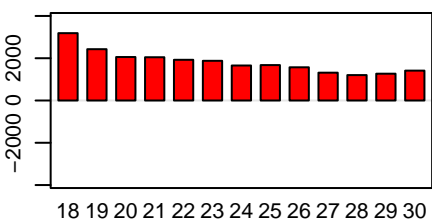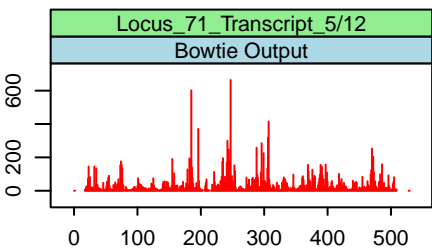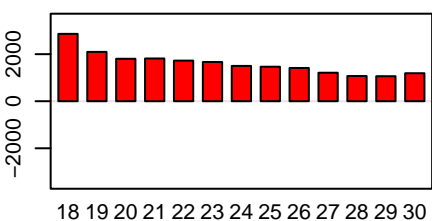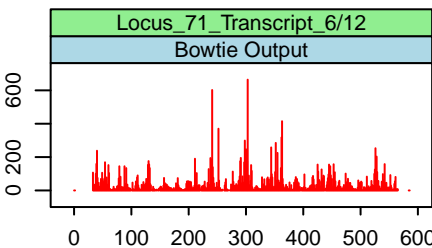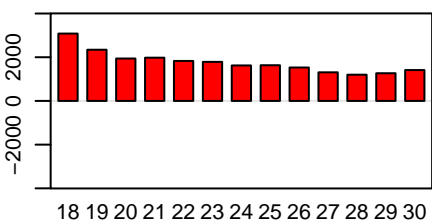

Coordinates/read size



# Readmaps and size distributions

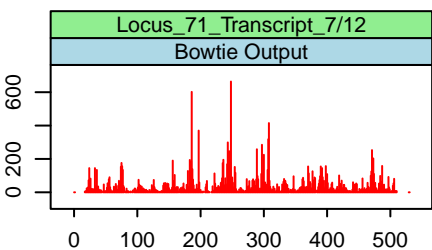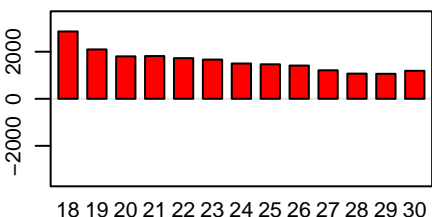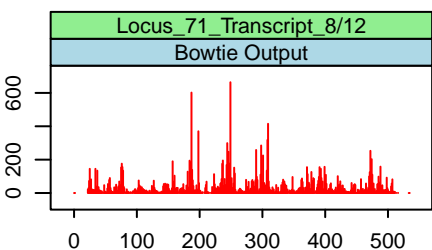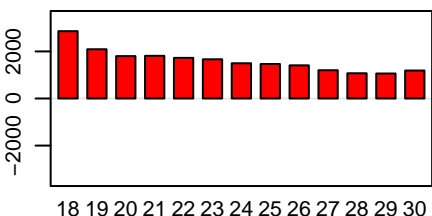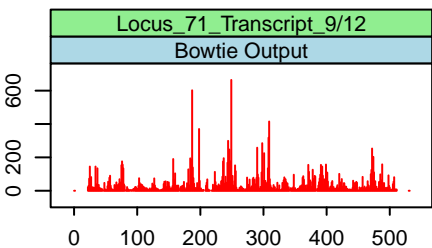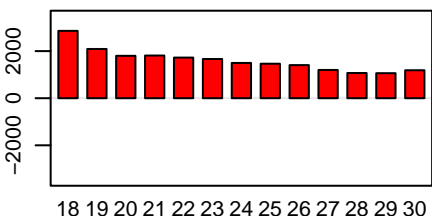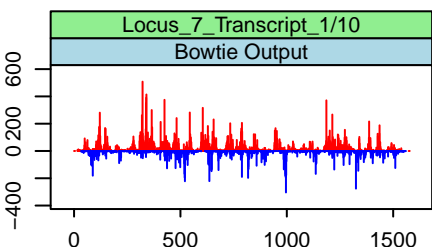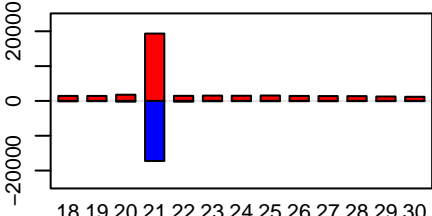

Coordinates/read size

Number of reads

# Readmaps and size distributions

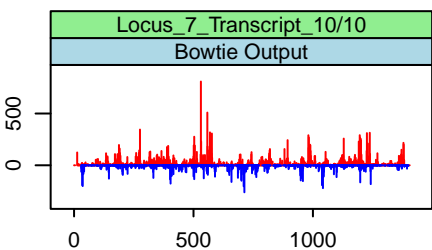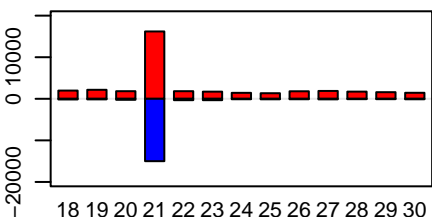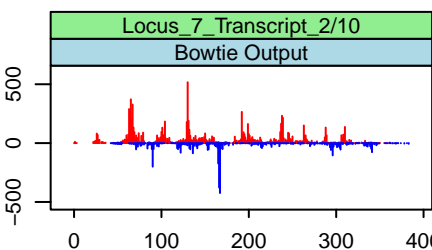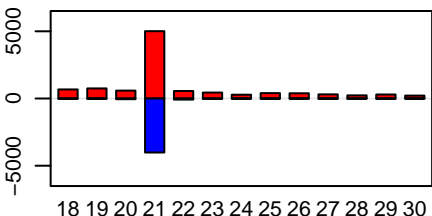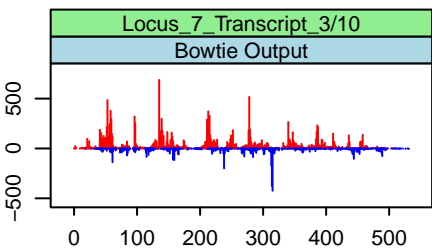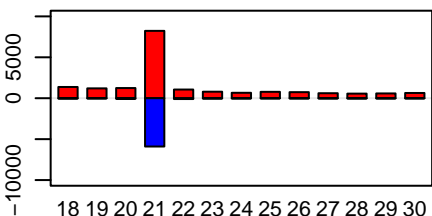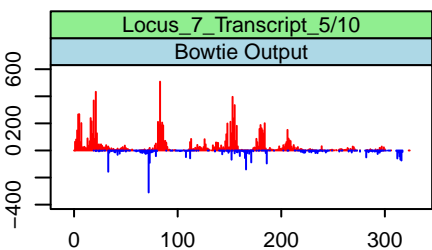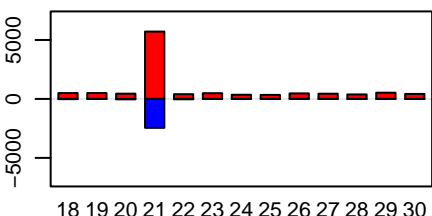

Coordinates/read size

# Readmaps and size distributions

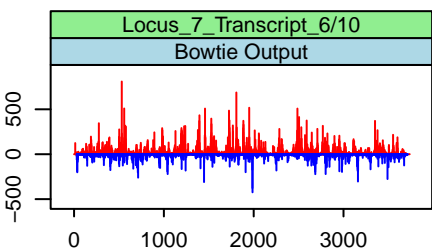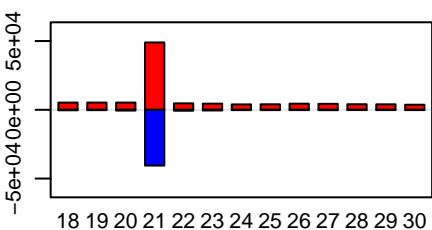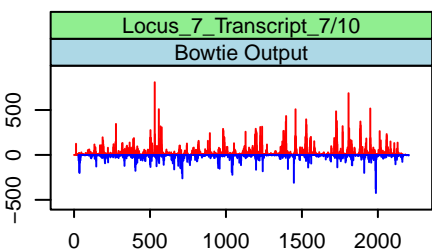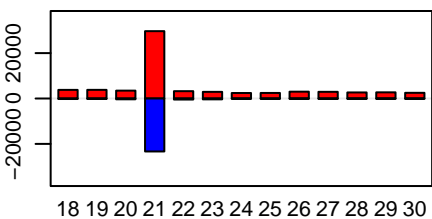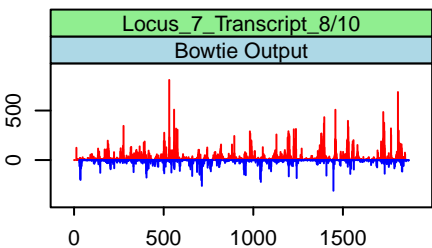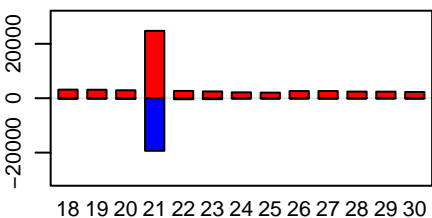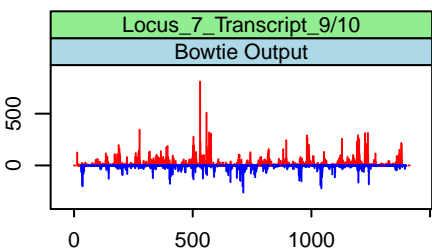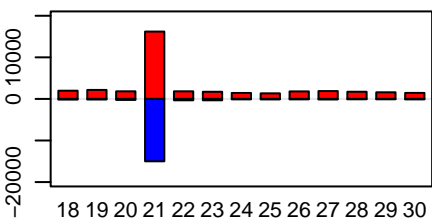

Coordinates/read size

# Readmaps and size distributions

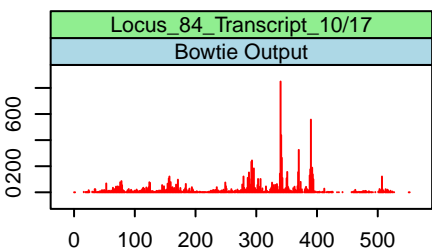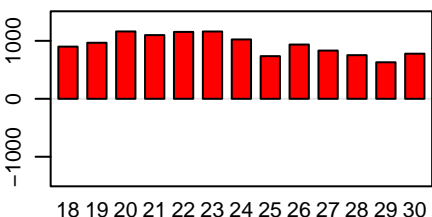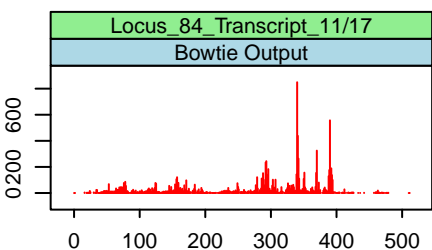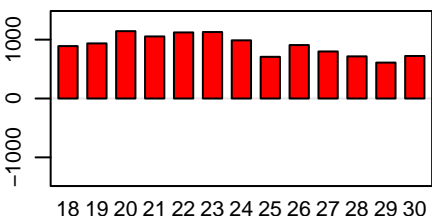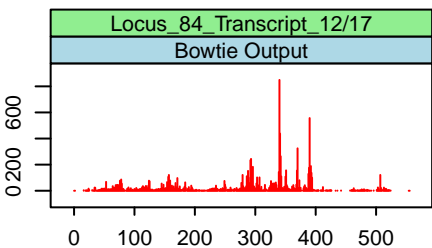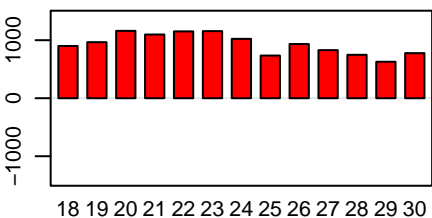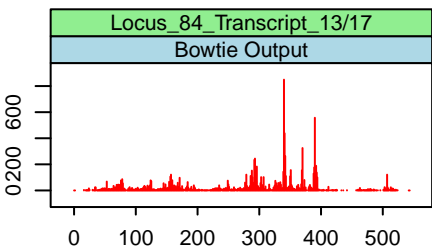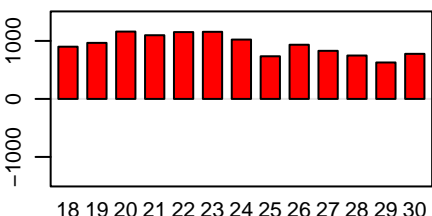

Coordinates/read size

# Readmaps and size distributions

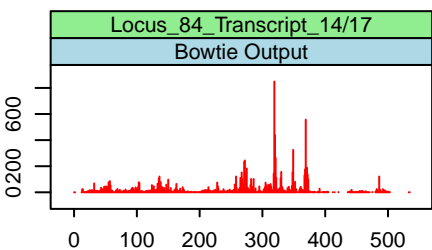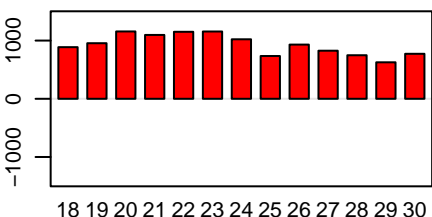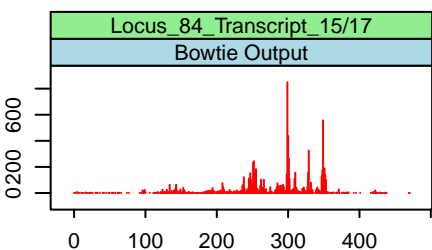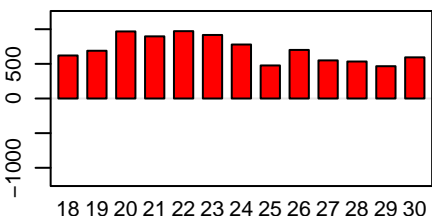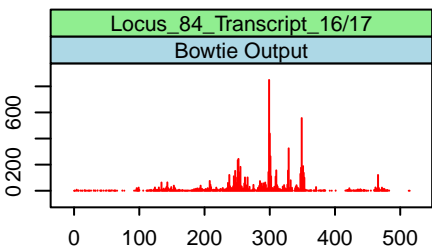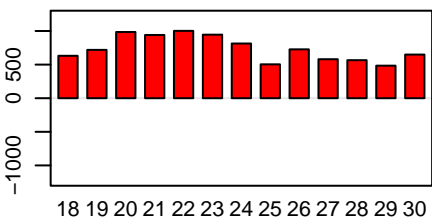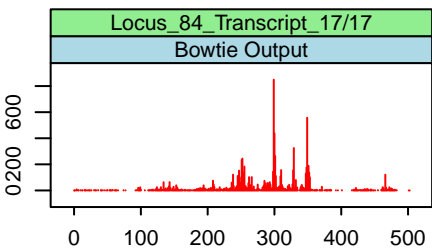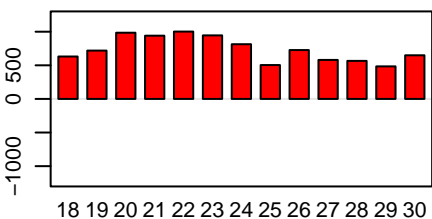

Coordinates/read size

# Readmaps and size distributions

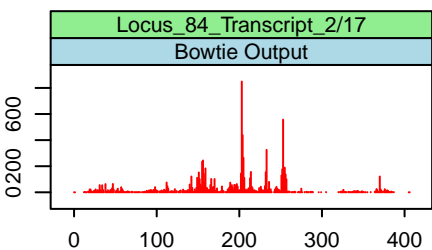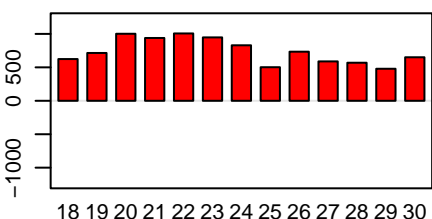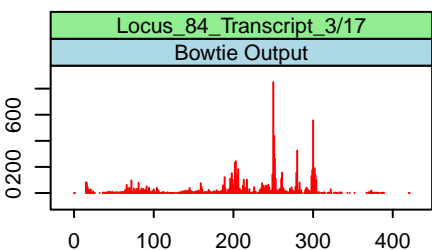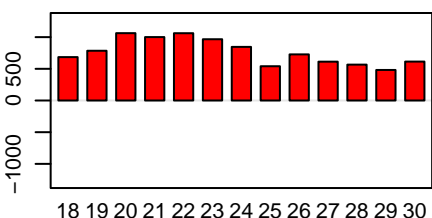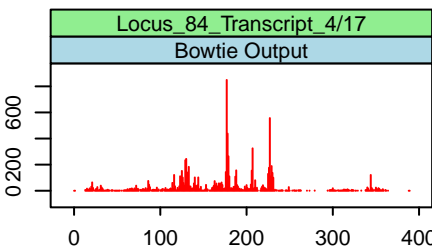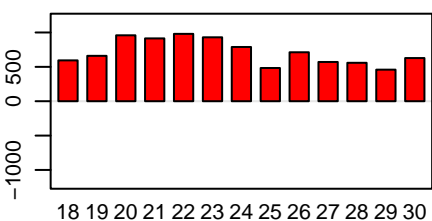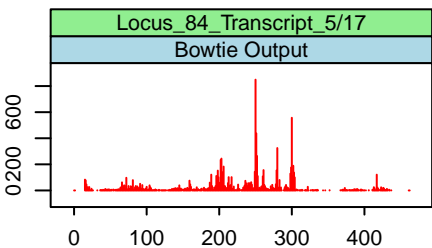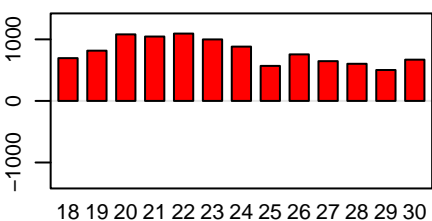

Coordinates/read size

# Readmaps and size distributions

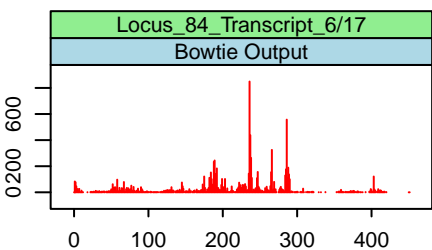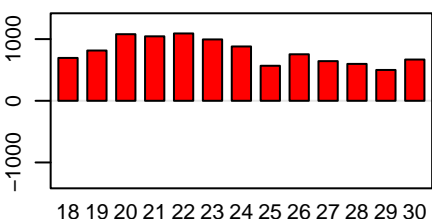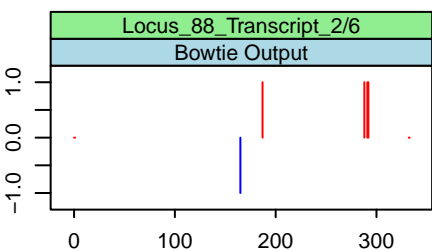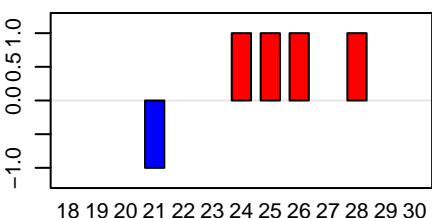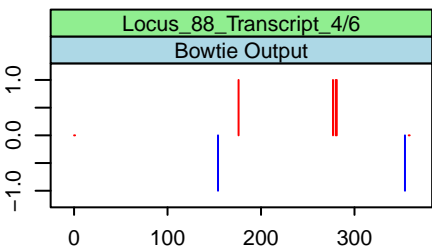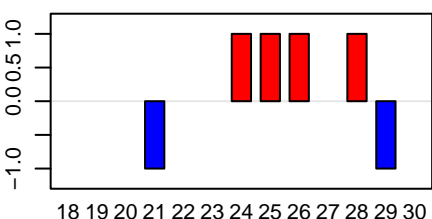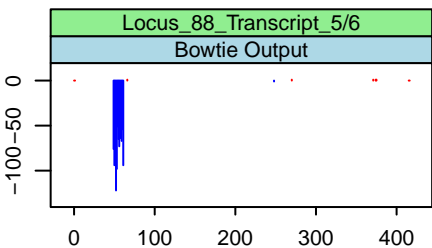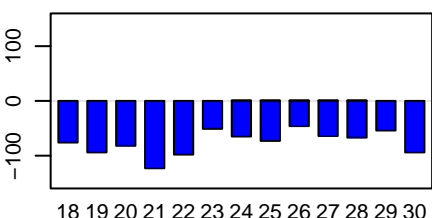

Coordinates/read size

# Readmaps and size distributions

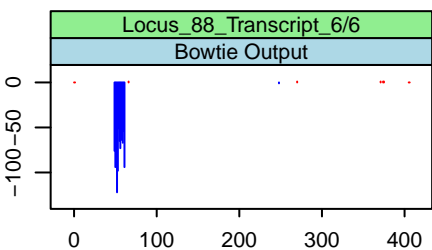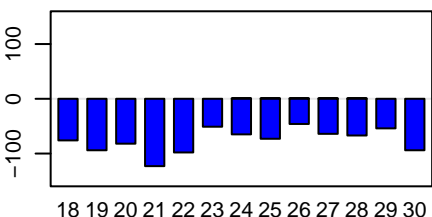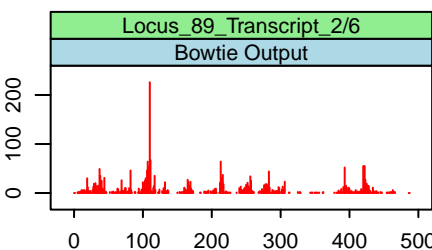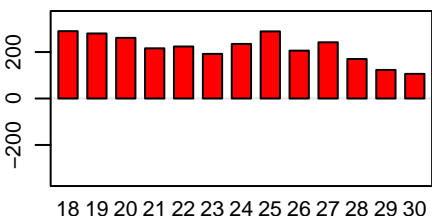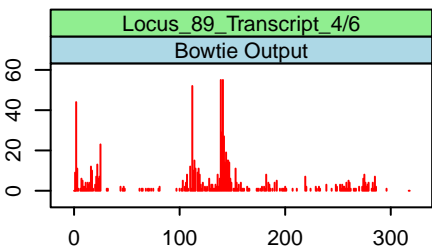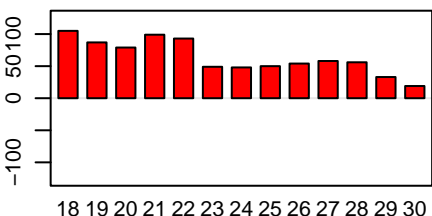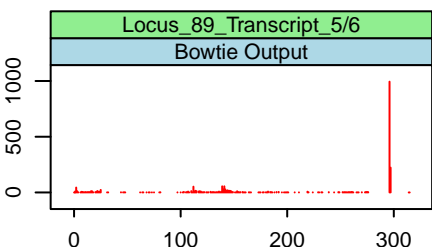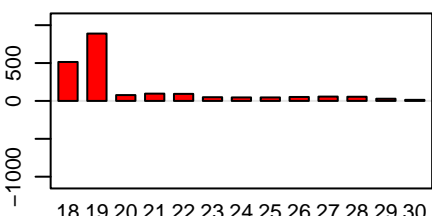

Coordinates/read size



# Readmaps and size distributions

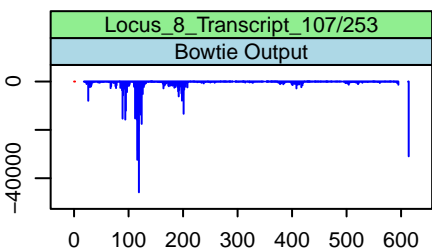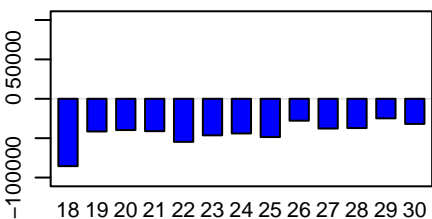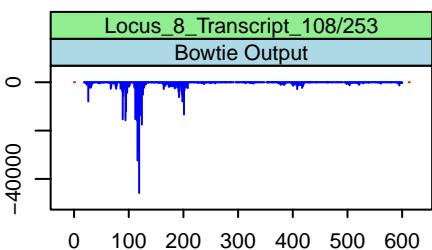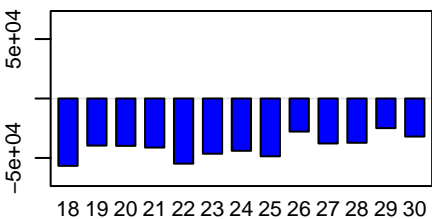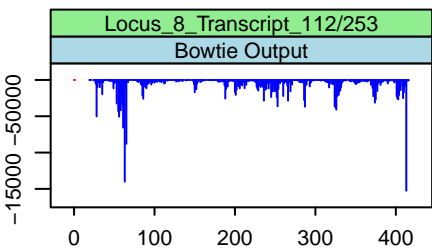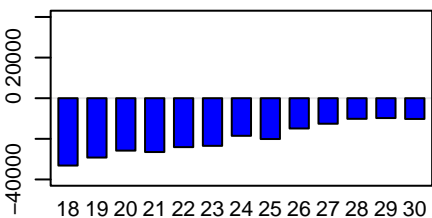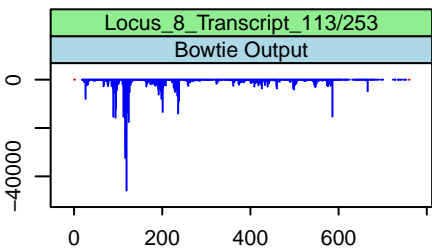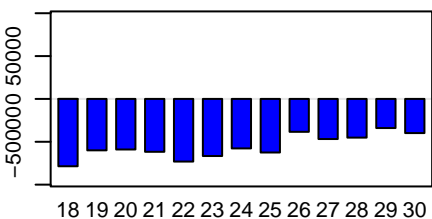

Coordinates/read size

# Readmaps and size distributions

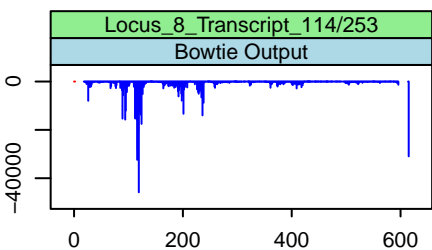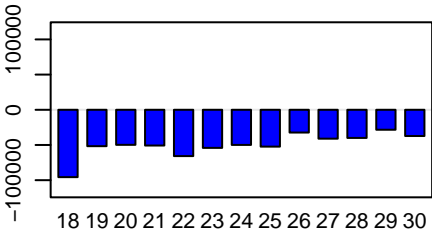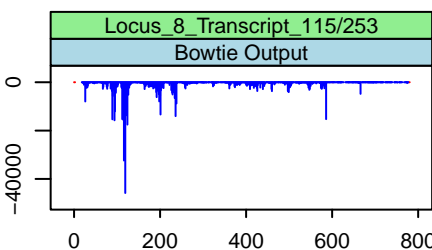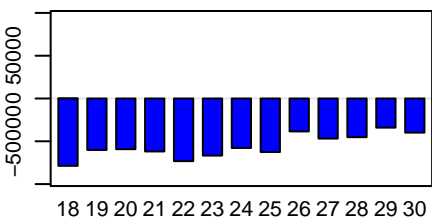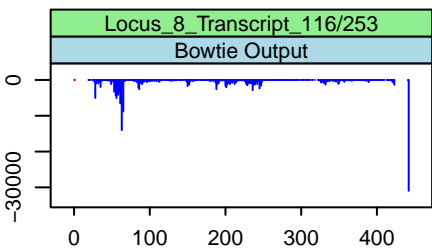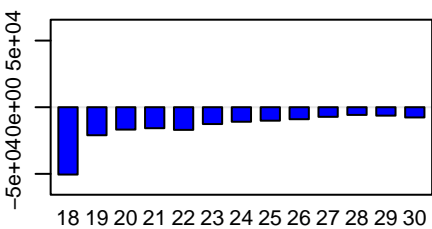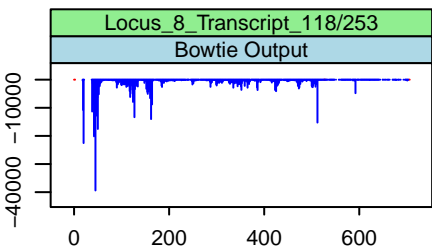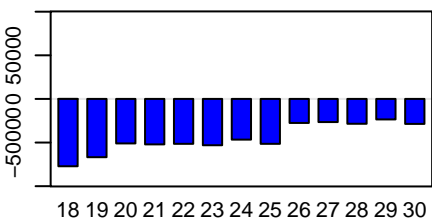

Coordinates/read size

# Readmaps and size distributions

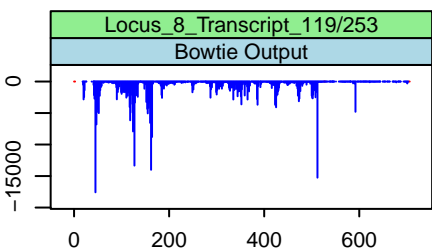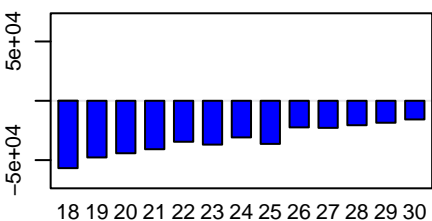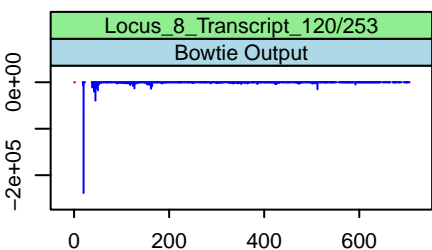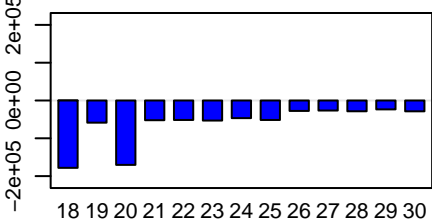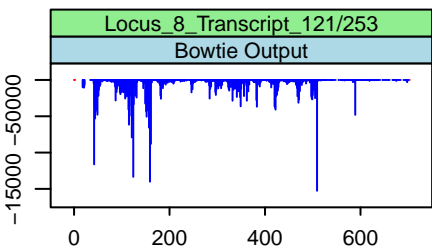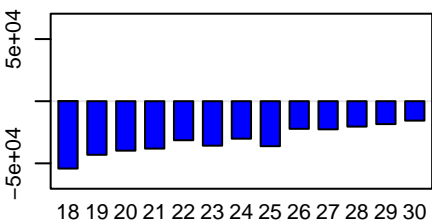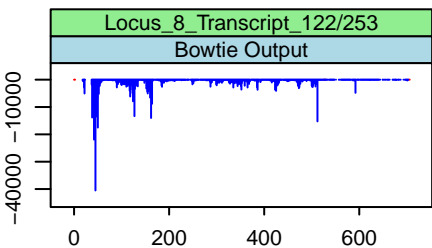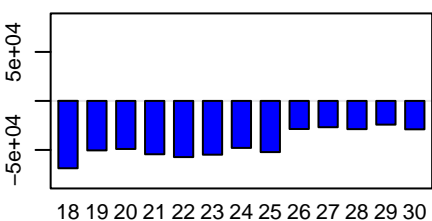

Coordinates/read size

# Readmaps and size distributions

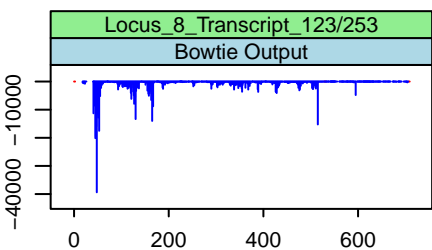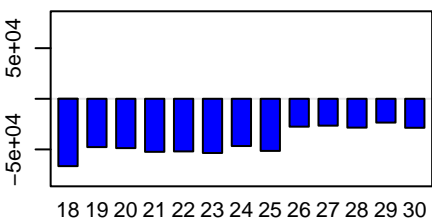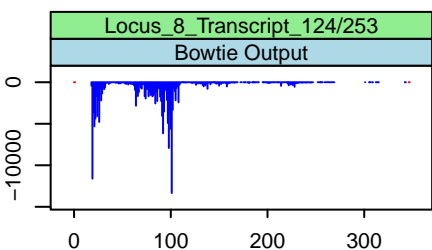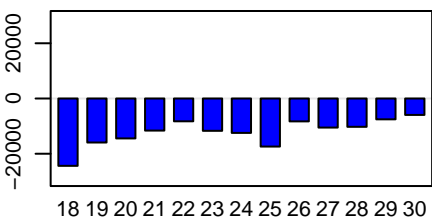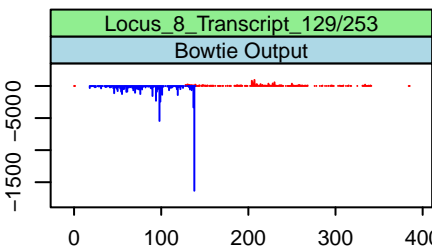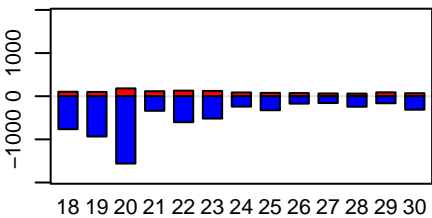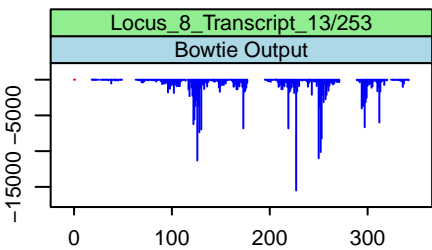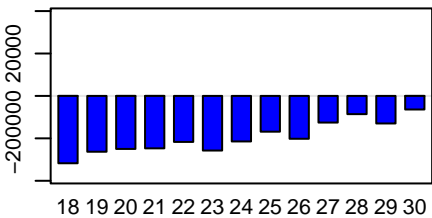

Coordinates/read size

Number of reads

# Readmaps and size distributions

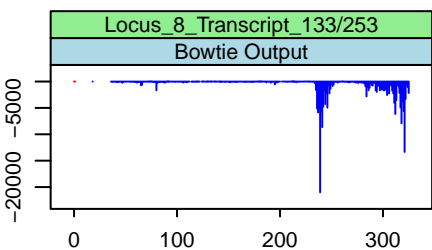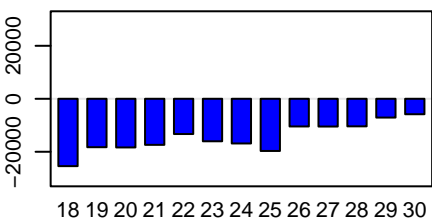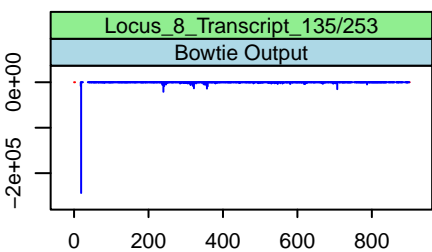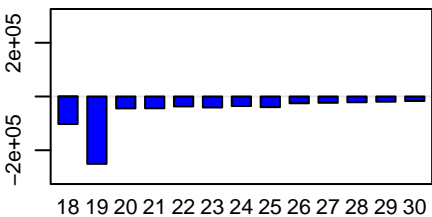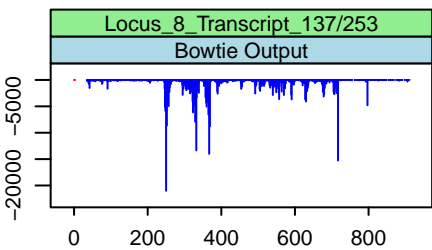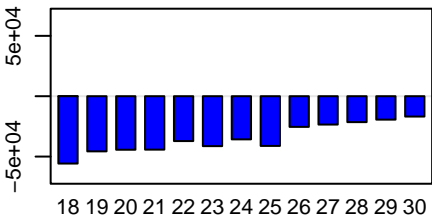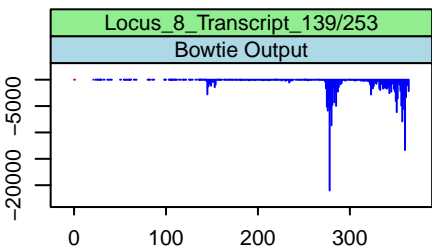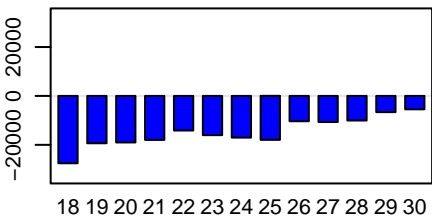

Coordinates/read size

Number of reads

# Readmaps and size distributions

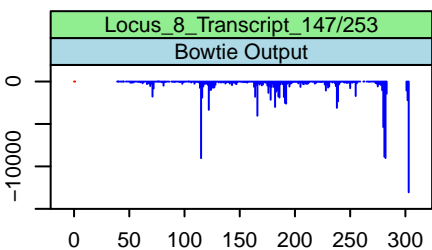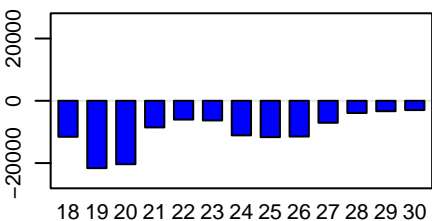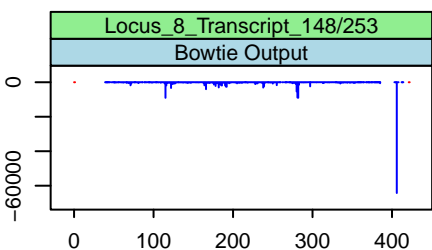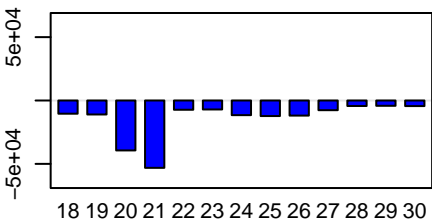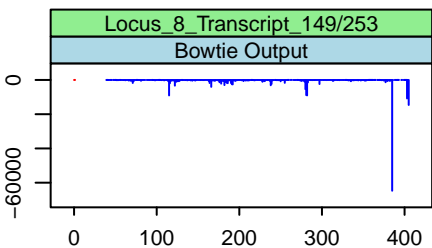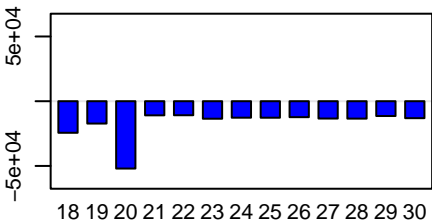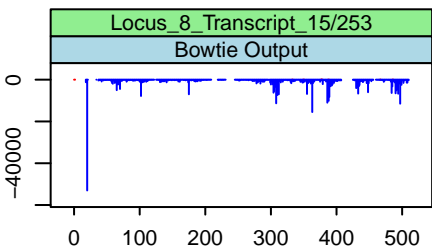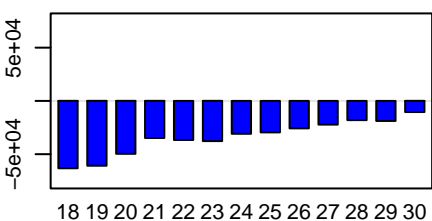

Coordinates/read size

Number of reads

# Readmaps and size distributions

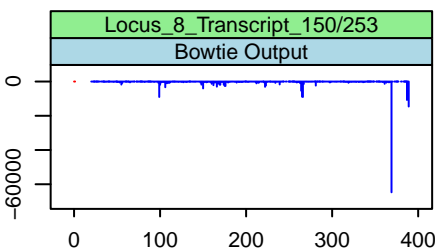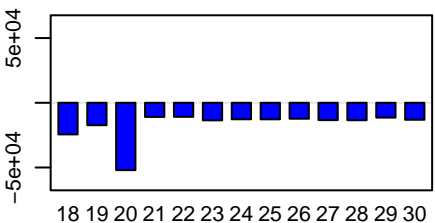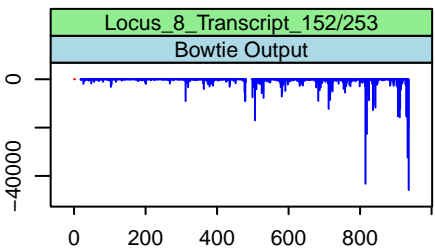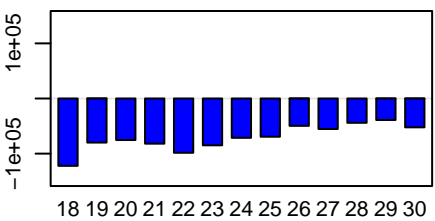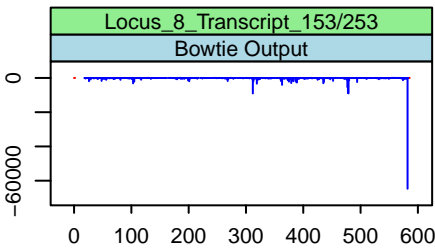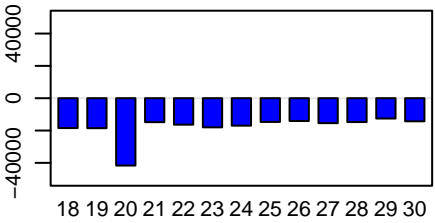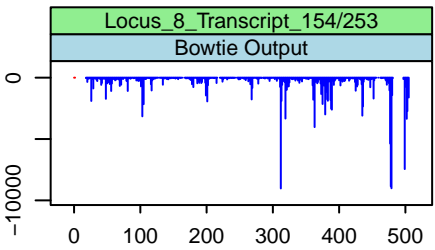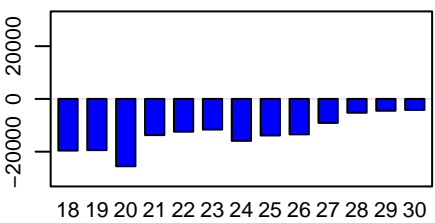

Coordinates/read size

Number of reads

# Readmaps and size distributions

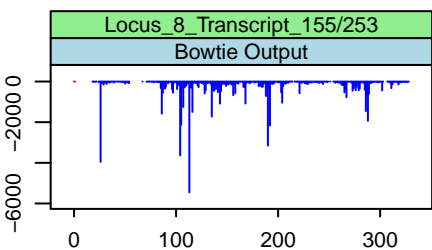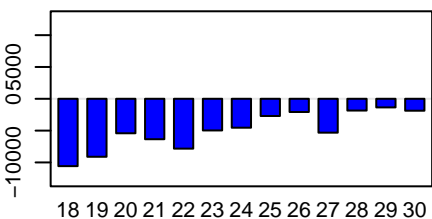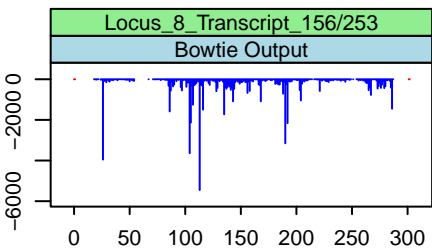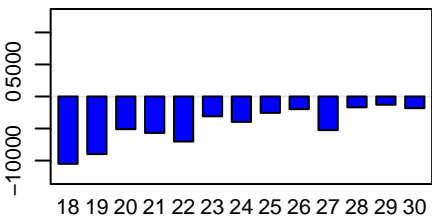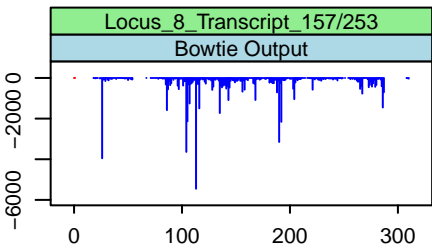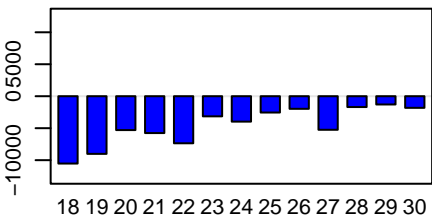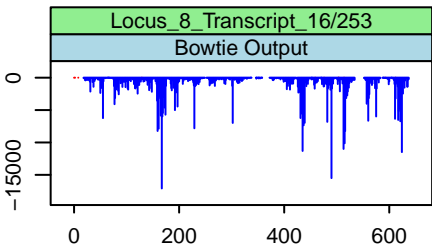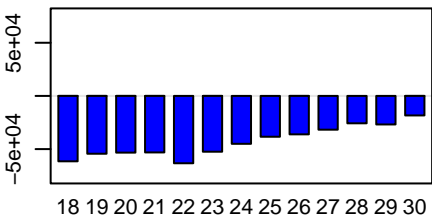

Coordinates/read size



# Readmaps and size distributions

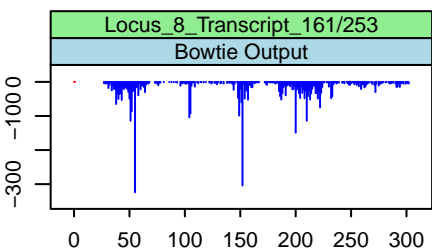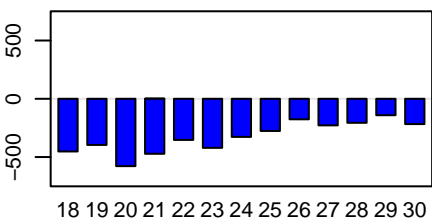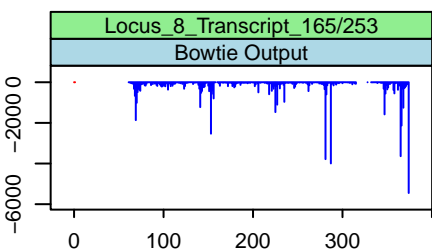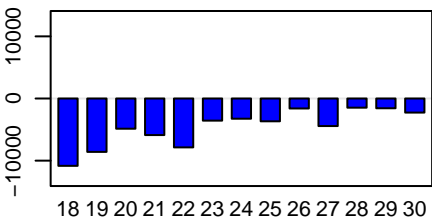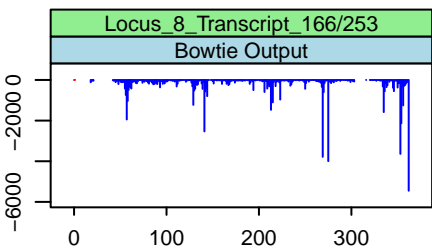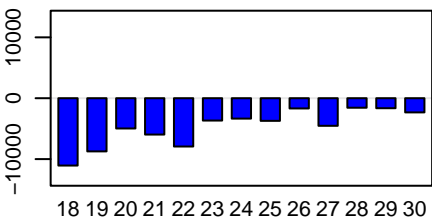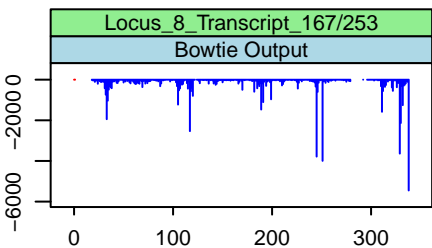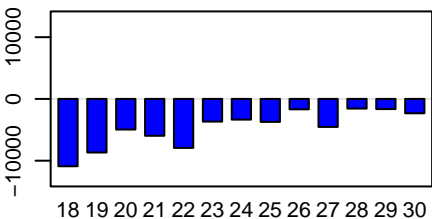

Coordinates/read size

# Readmaps and size distributions

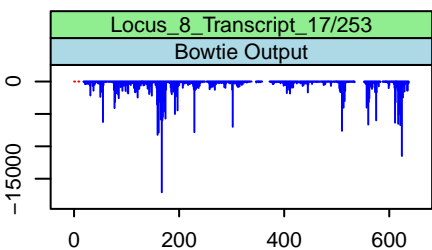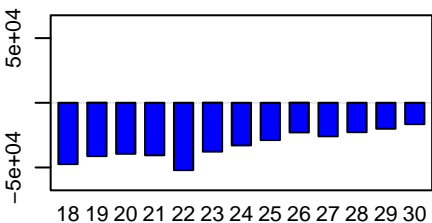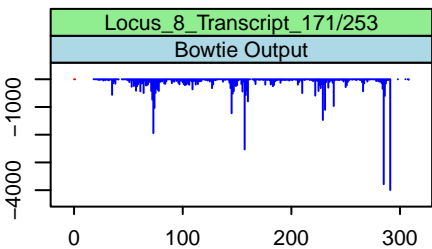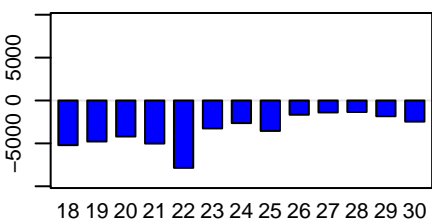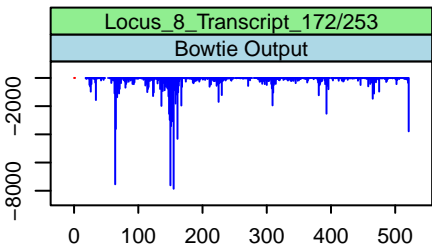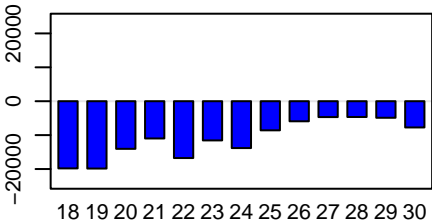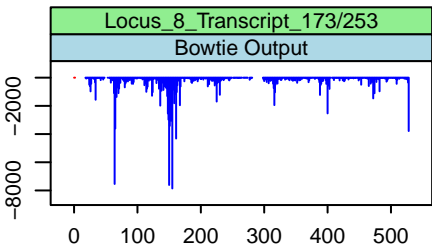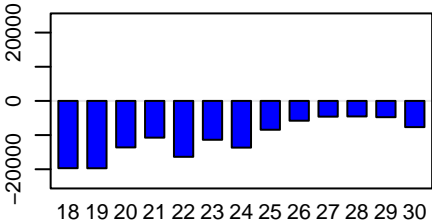

Coordinates/read size

# Readmaps and size distributions

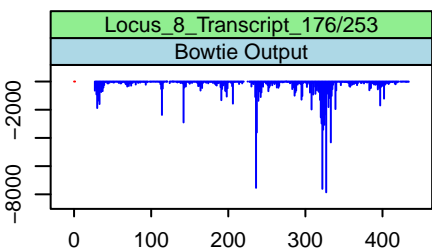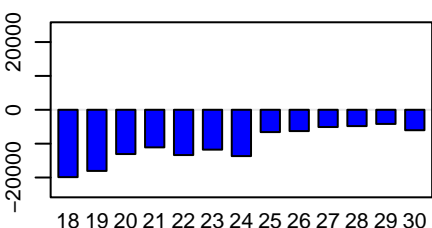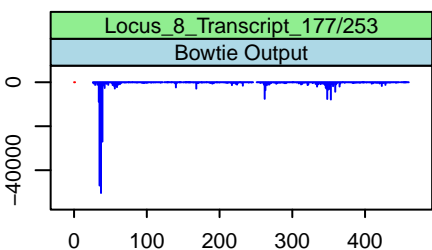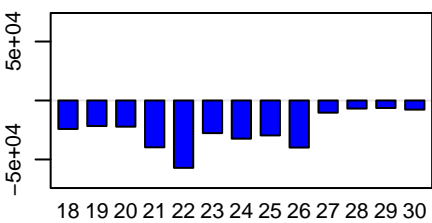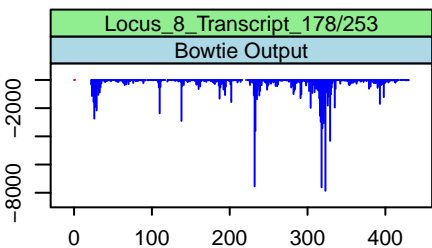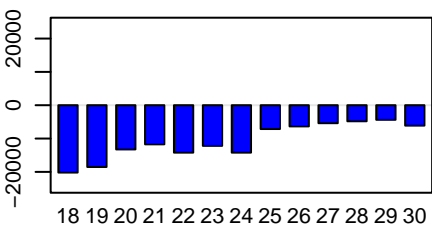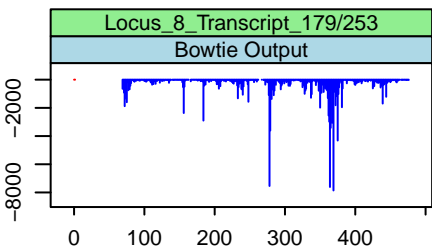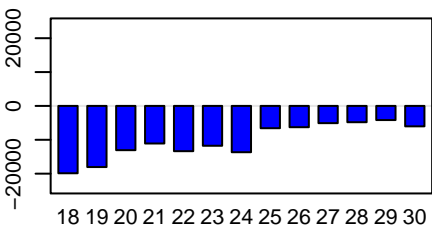

Coordinates/read size

# Readmaps and size distributions

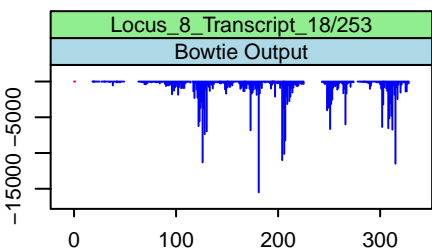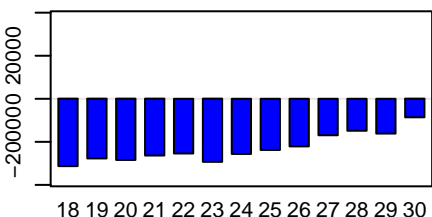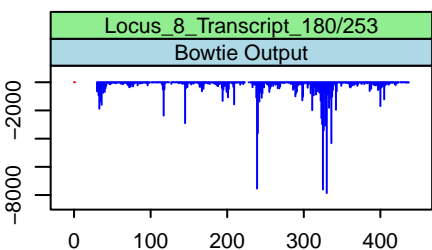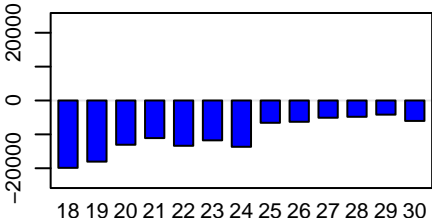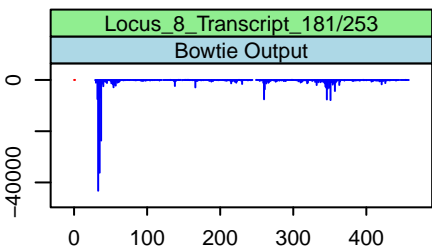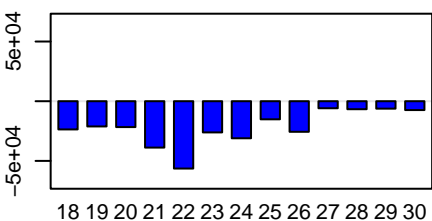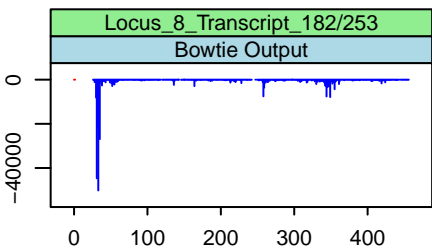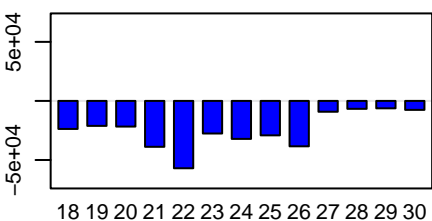

Coordinates/read size

# Readmaps and size distributions

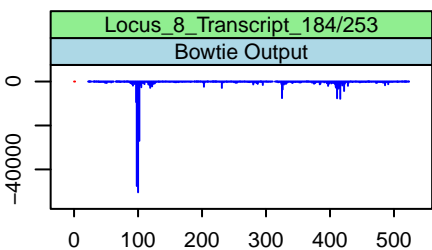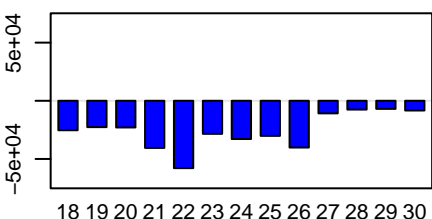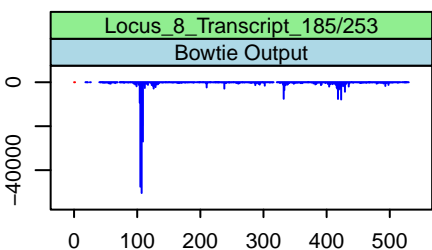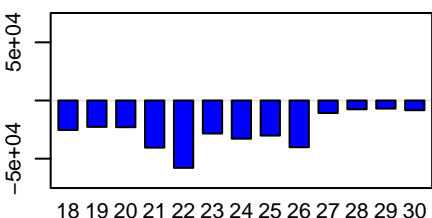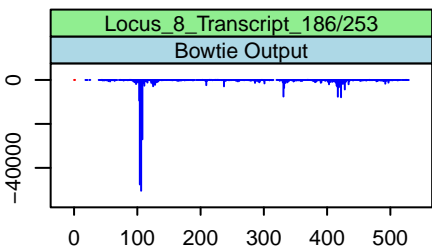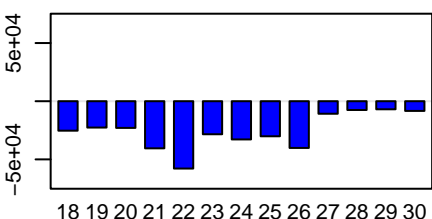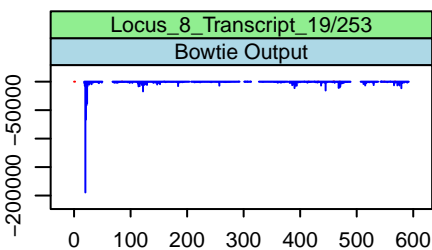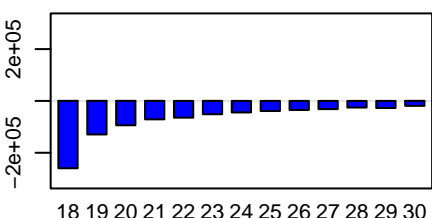

Coordinates/read size

# Readmaps and size distributions

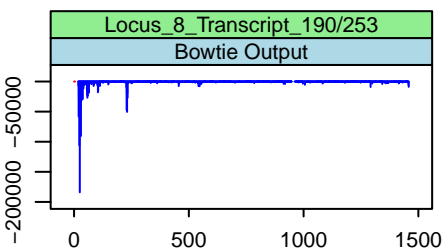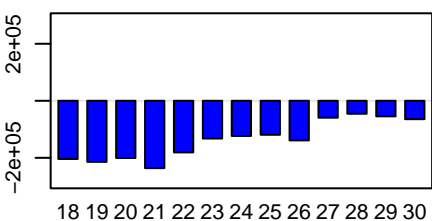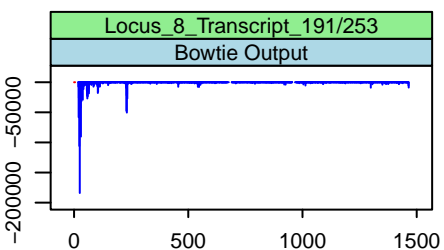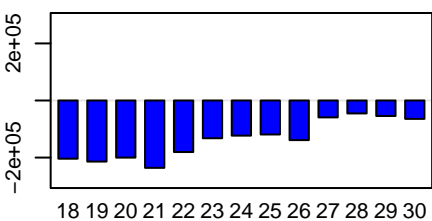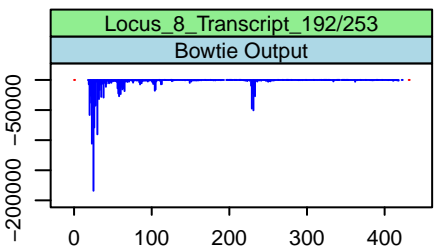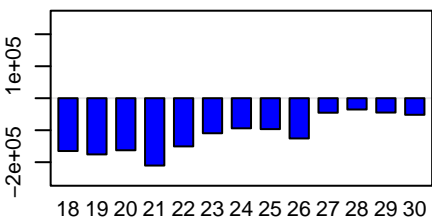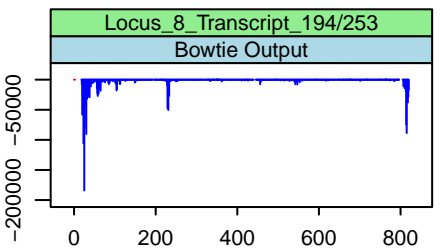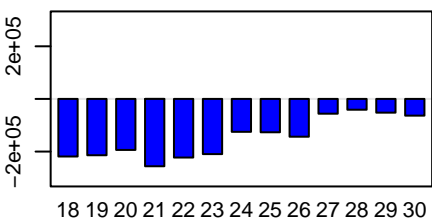

Coordinates/read size

# Readmaps and size distributions

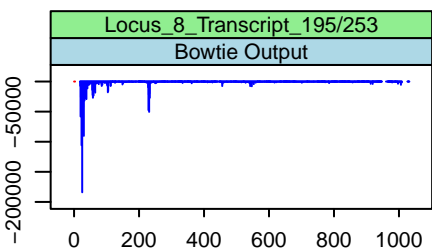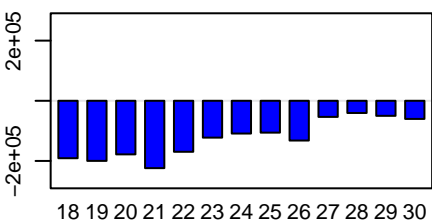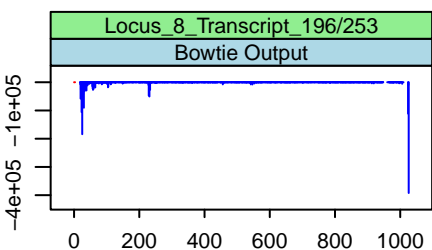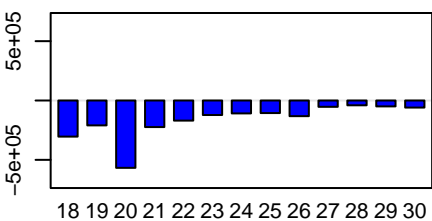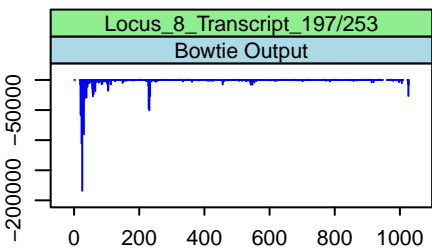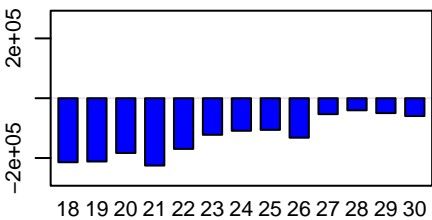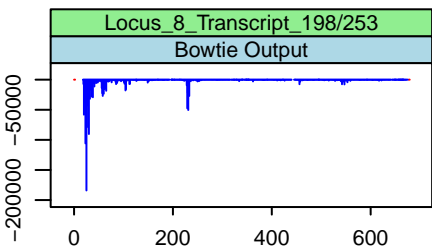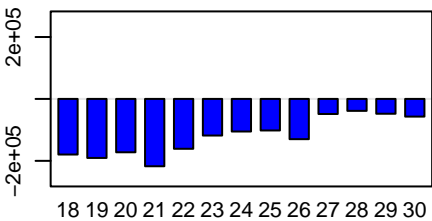

Coordinates/read size

Number of reads

# Readmaps and size distributions

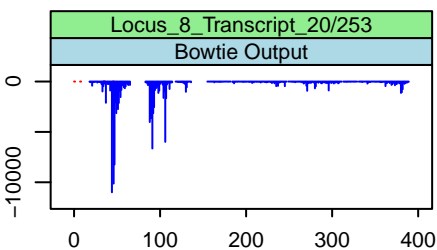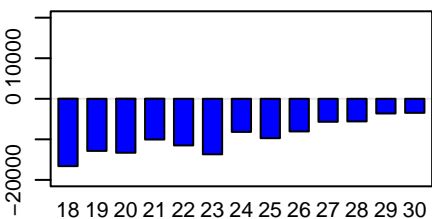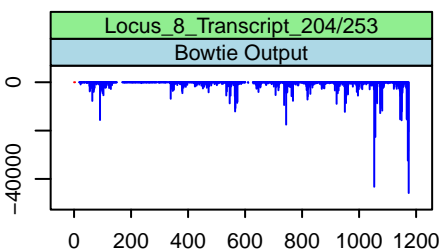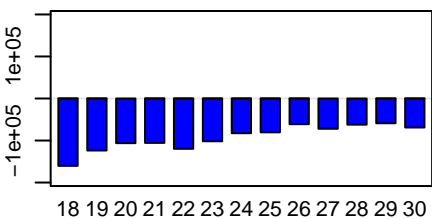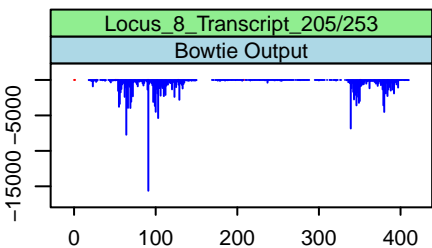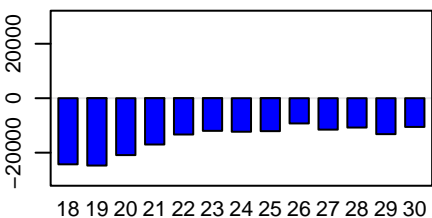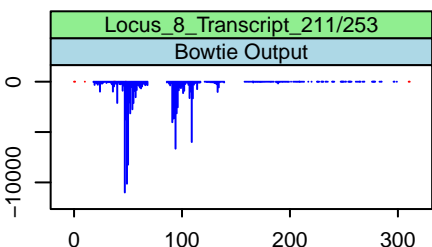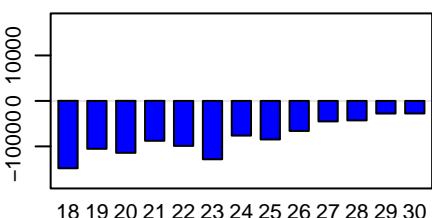

Coordinates/read size



# Readmaps and size distributions

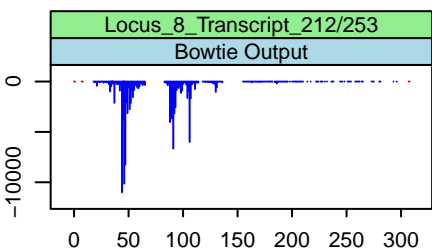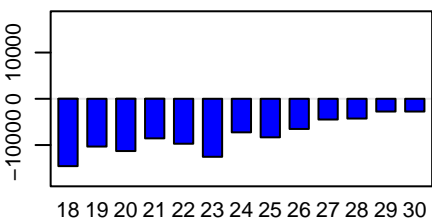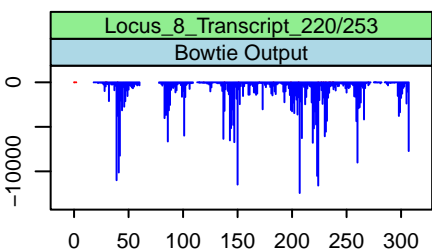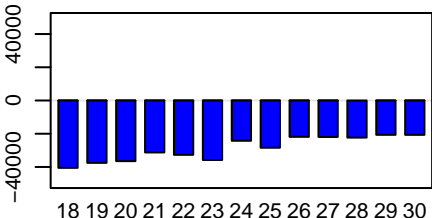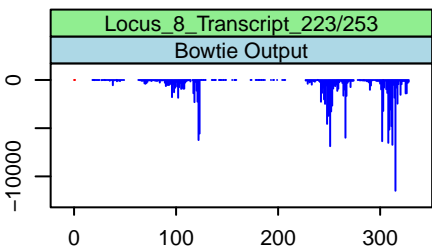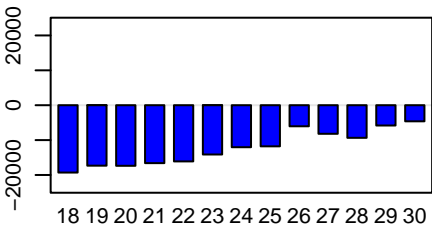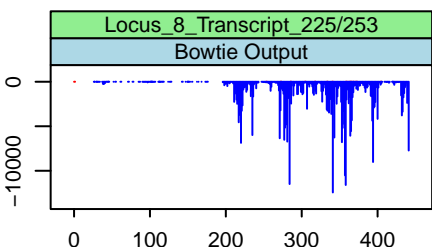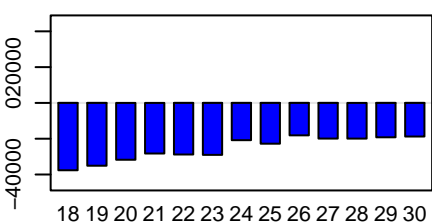

Coordinates/read size

# Readmaps and size distributions

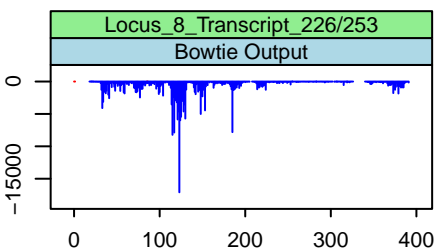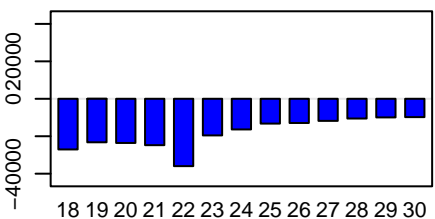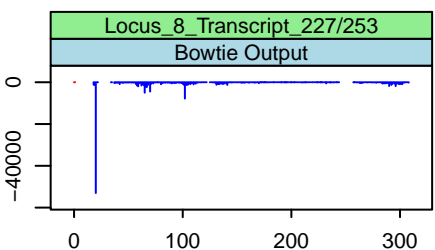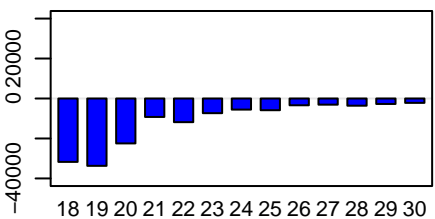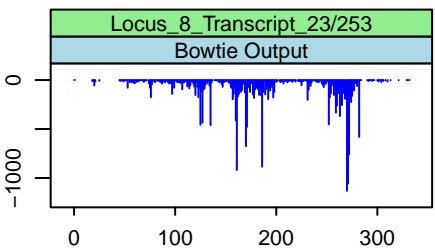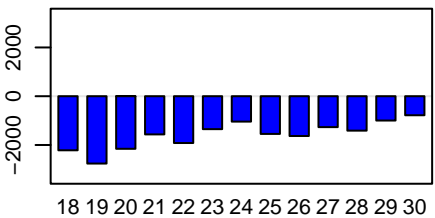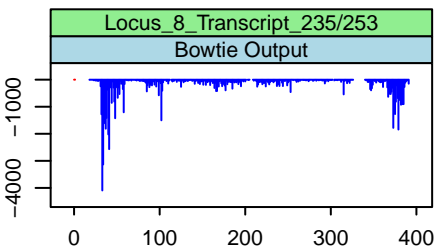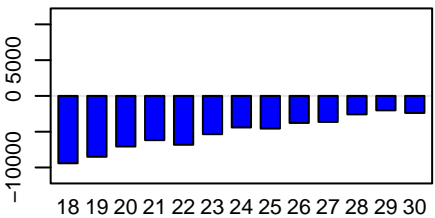

Coordinates/read size

# Readmaps and size distributions

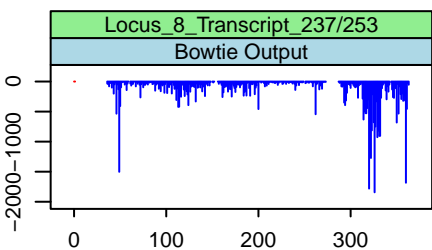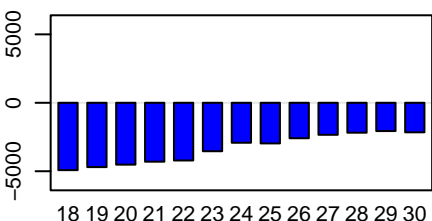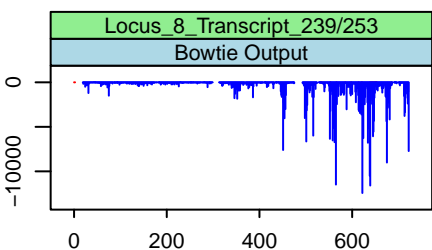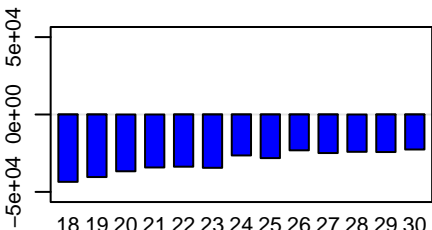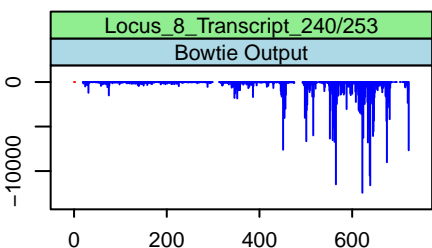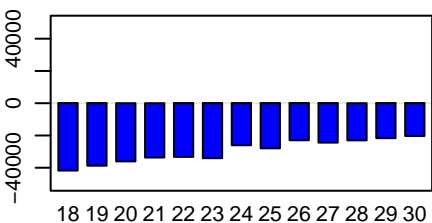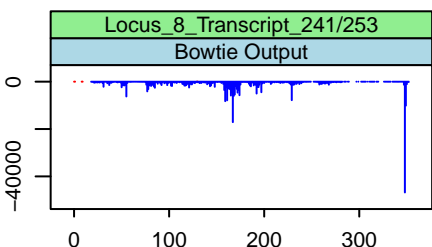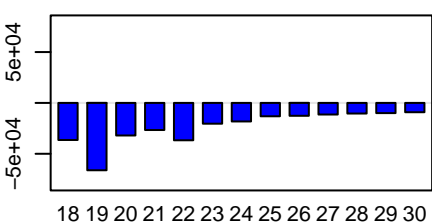

Coordinates/read size

# Readmaps and size distributions

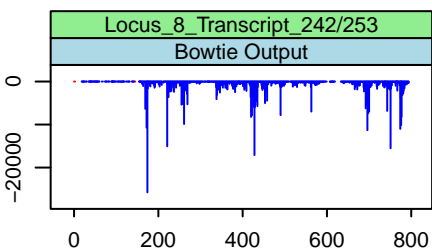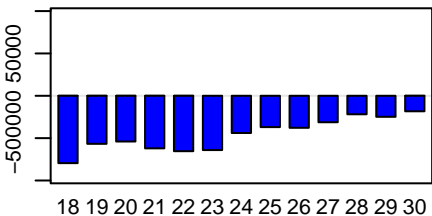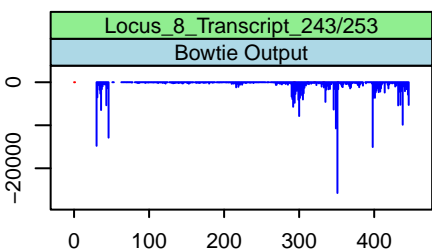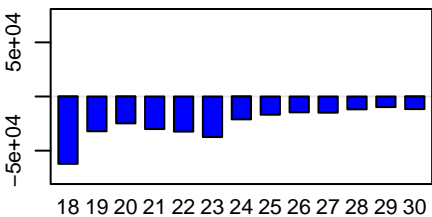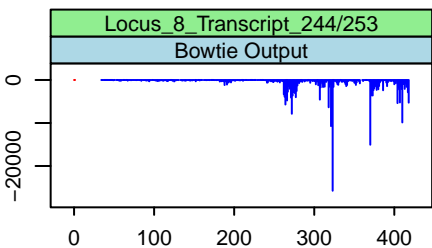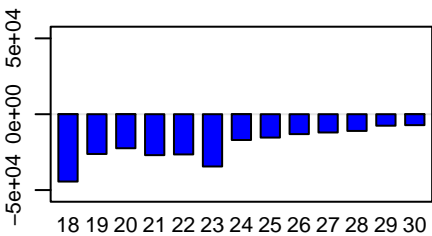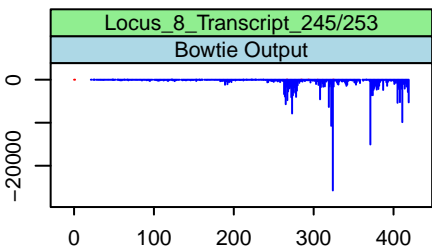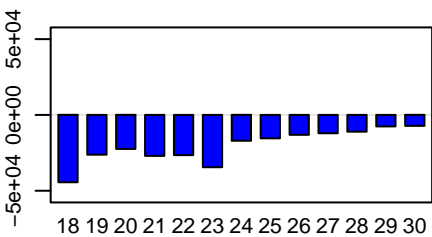

Coordinates/read size

# Readmaps and size distributions

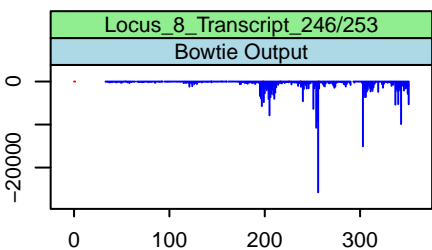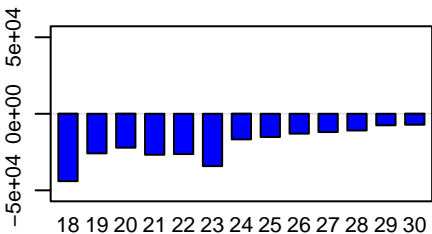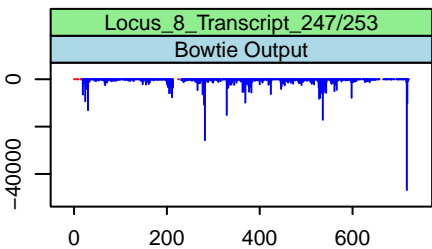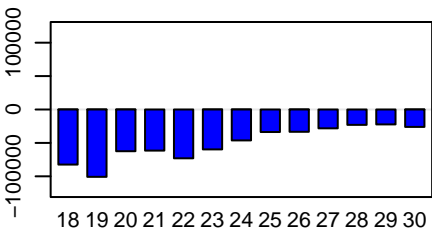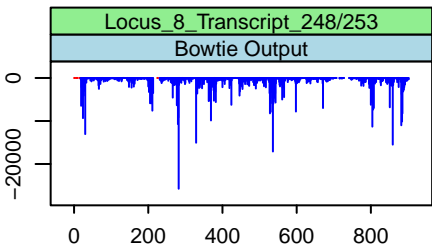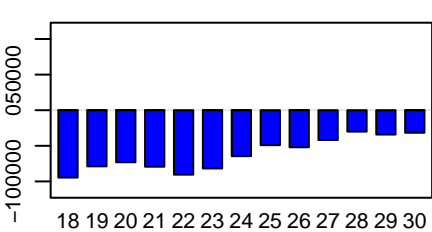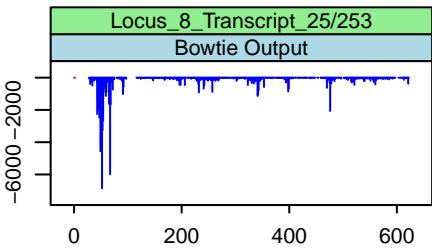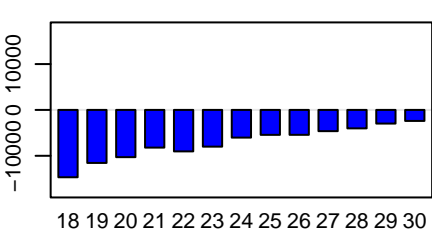

Coordinates/read size

# Readmaps and size distributions

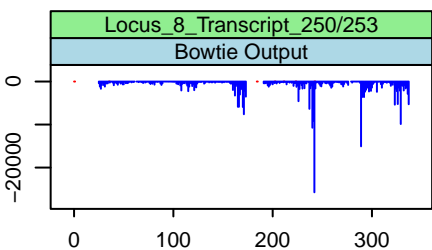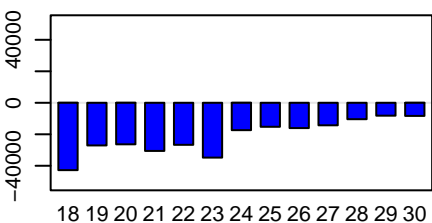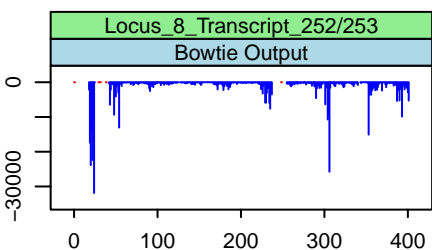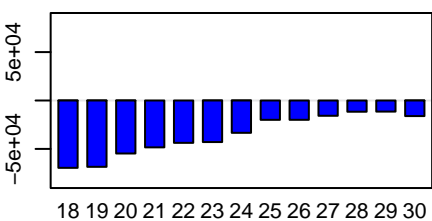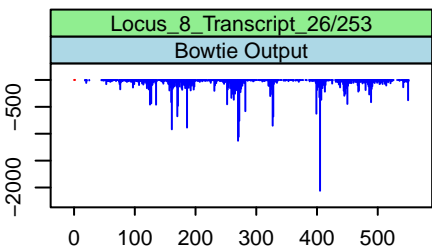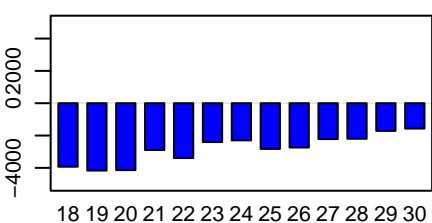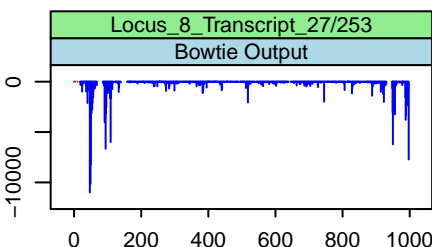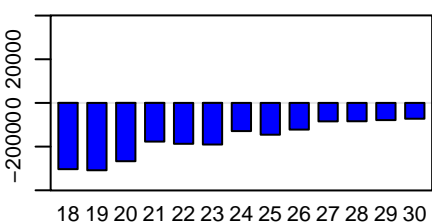

Coordinates/read size

# Readmaps and size distributions

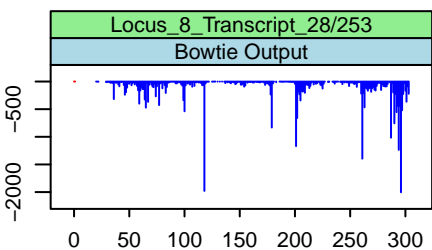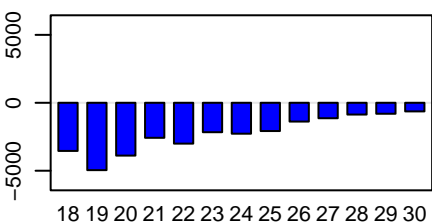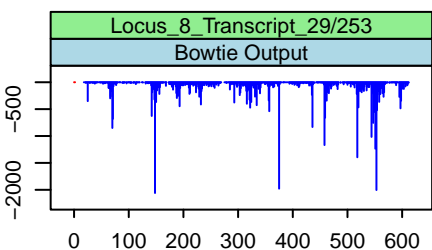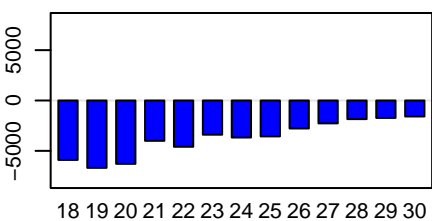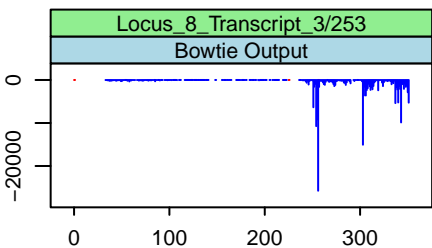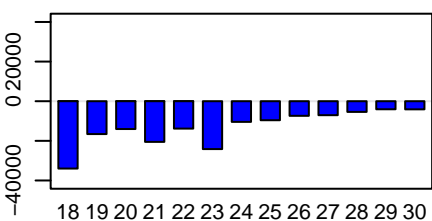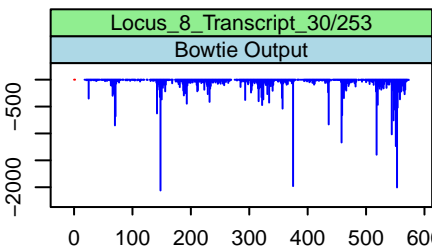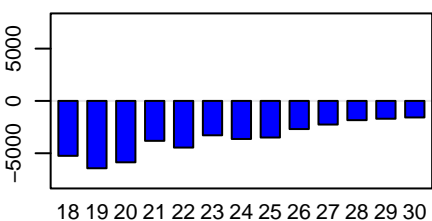

Coordinates/read size

# Readmaps and size distributions

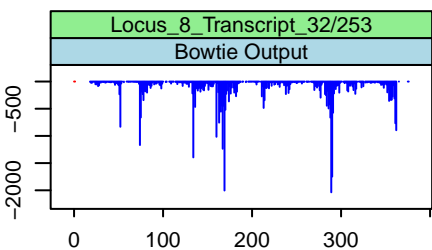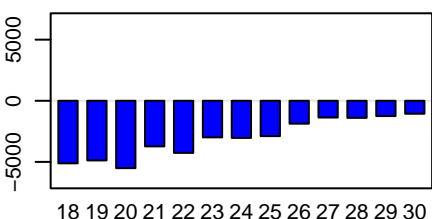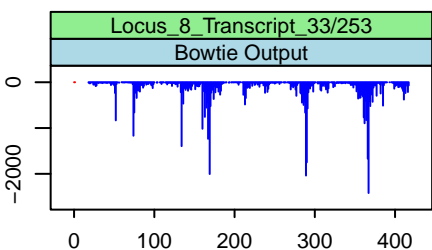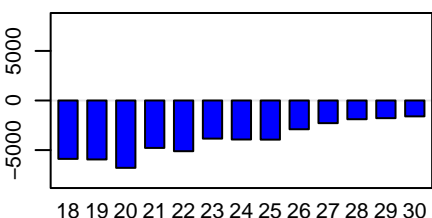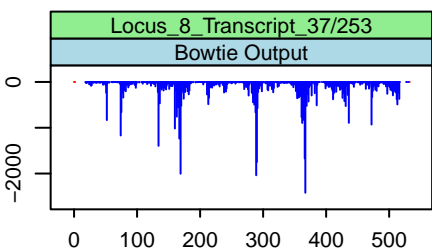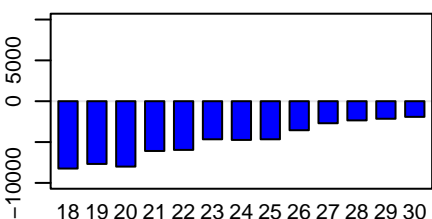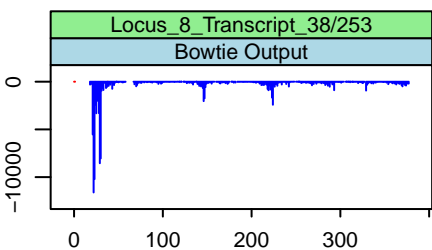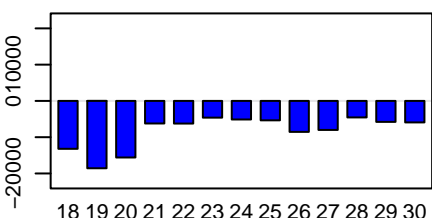

Coordinates/read size



# Readmaps and size distributions

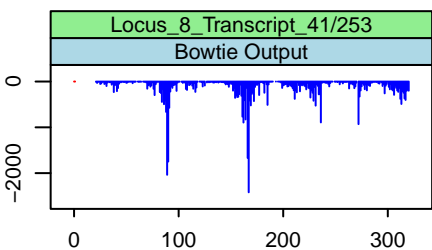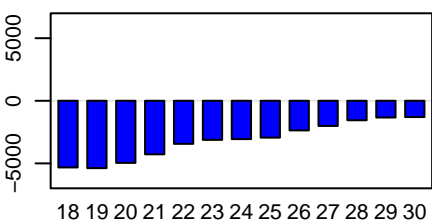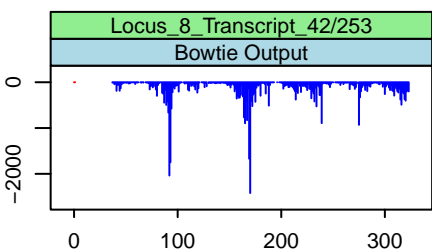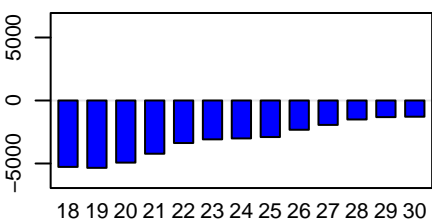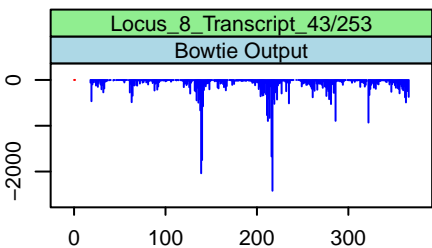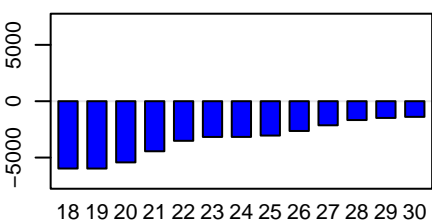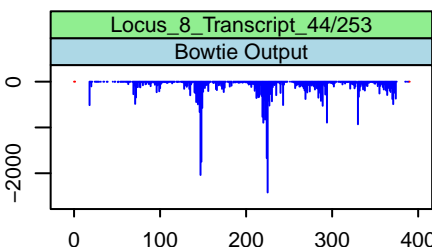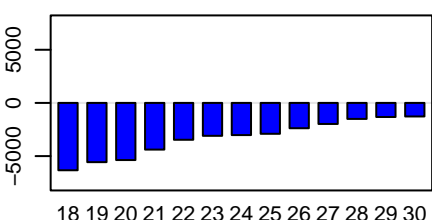

Coordinates/read size

# Readmaps and size distributions

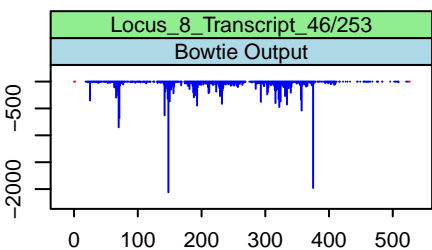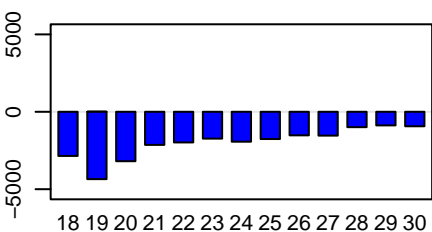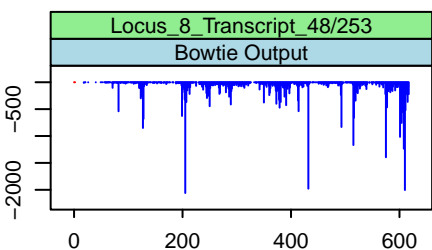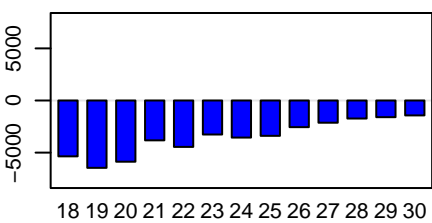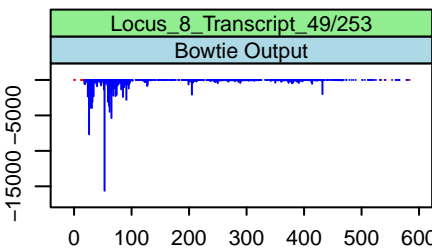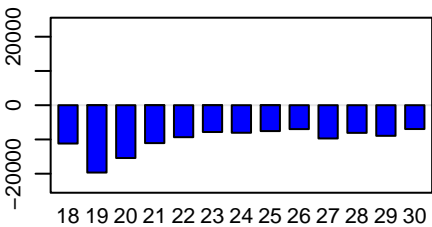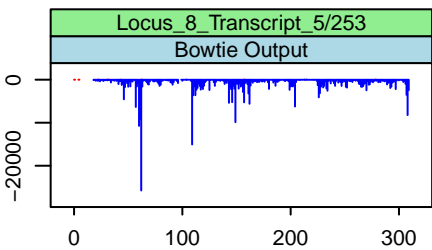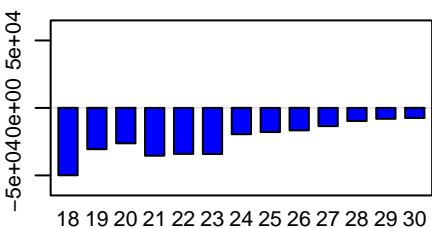

Coordinates/read size

# Readmaps and size distributions

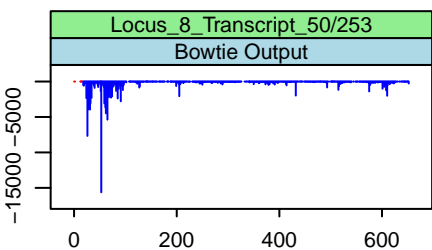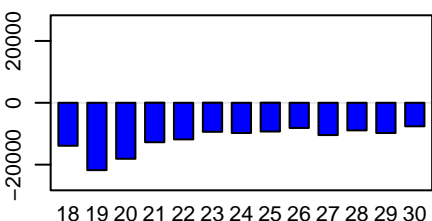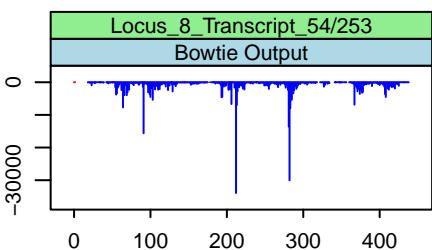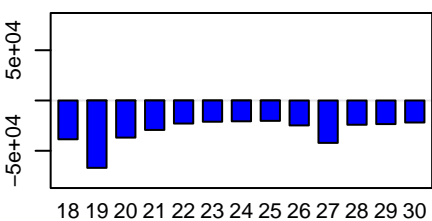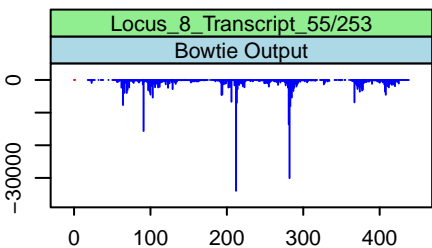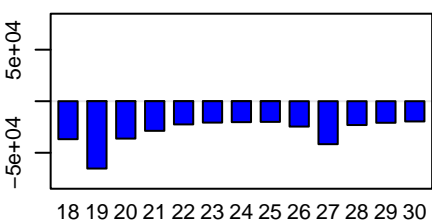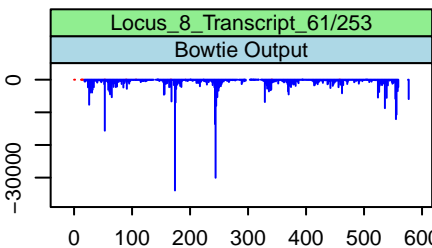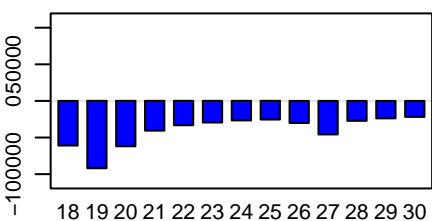

Coordinates/read size

# Readmaps and size distributions

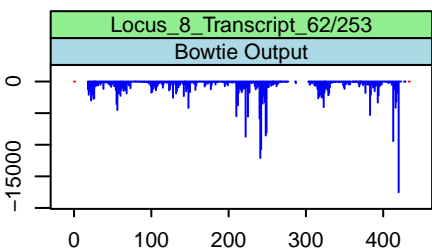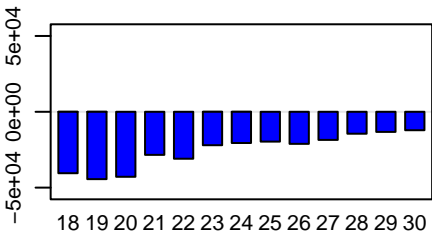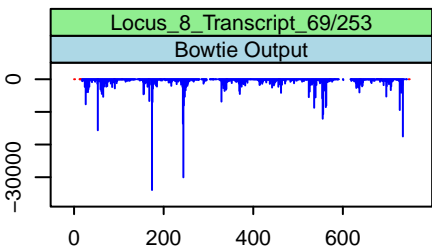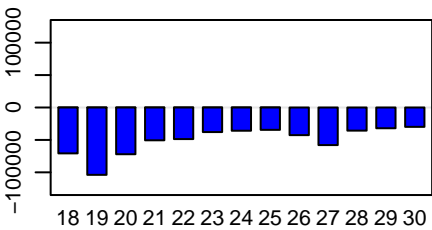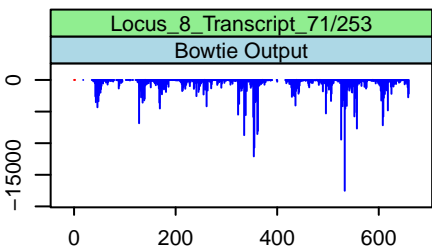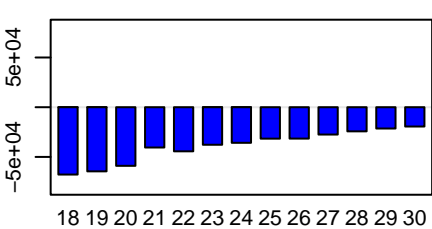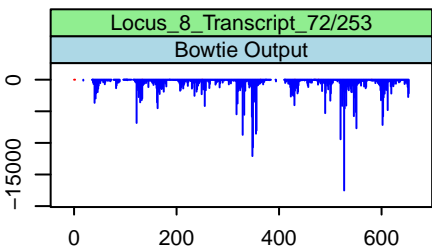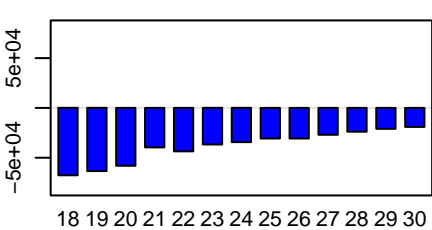

Coordinates/read size

# Readmaps and size distributions

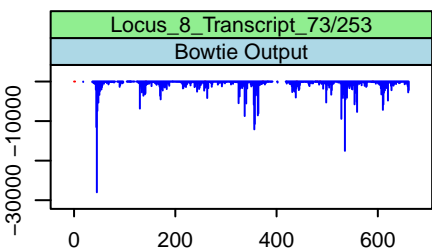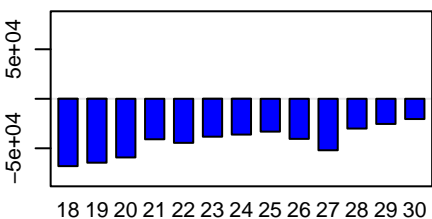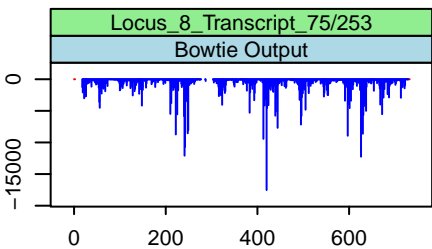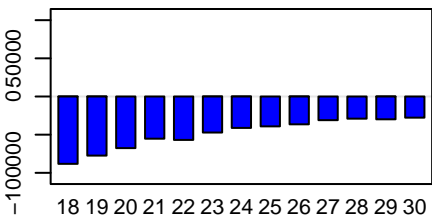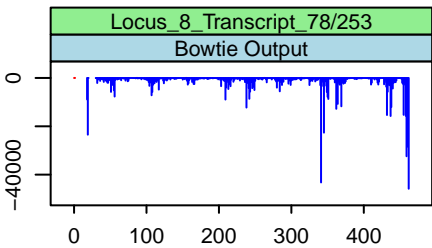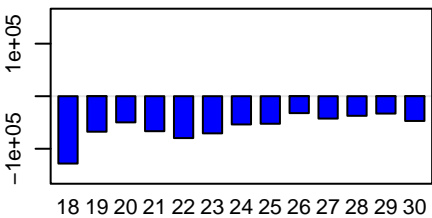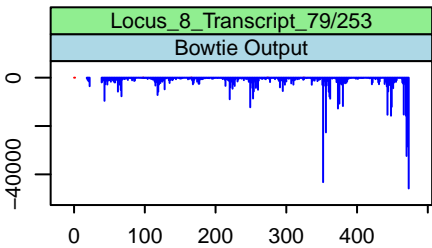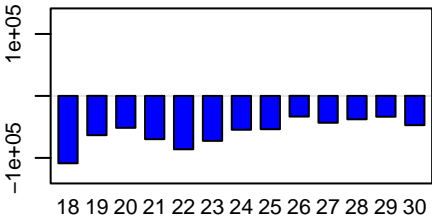

Coordinates/read size

Number of reads

# Readmaps and size distributions

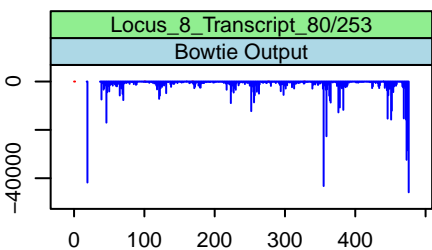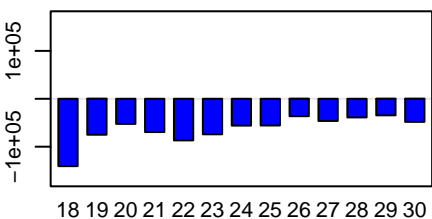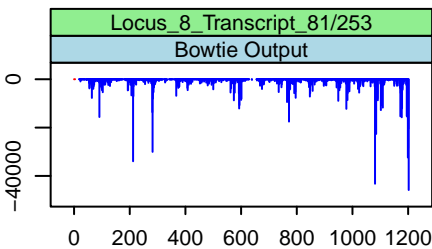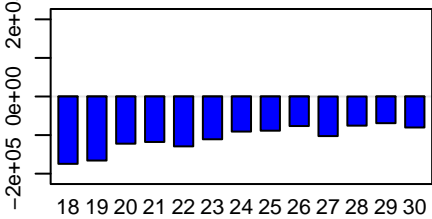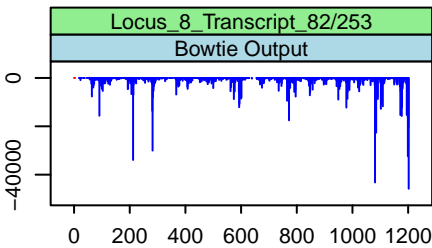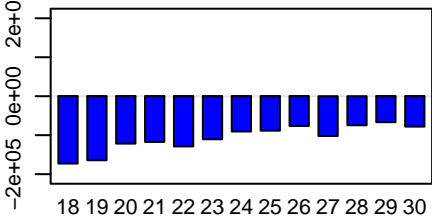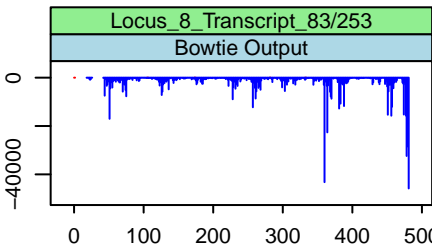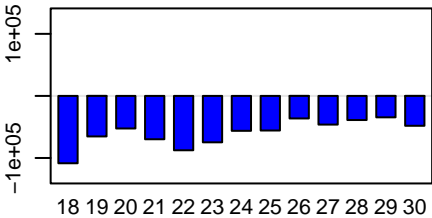

Coordinates/read size

Number of reads

# Readmaps and size distributions

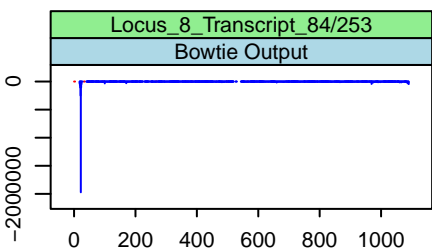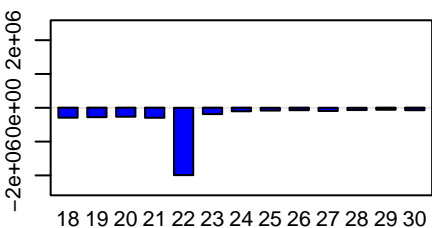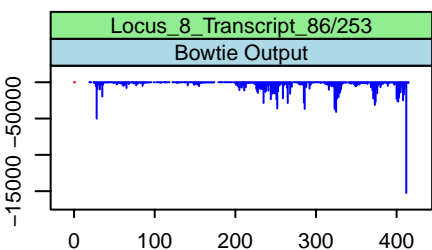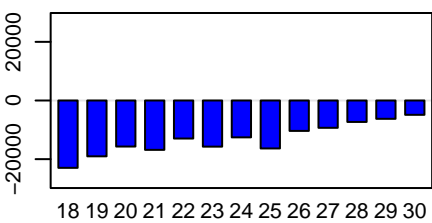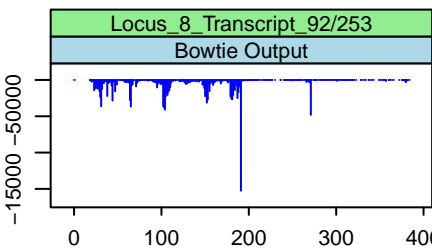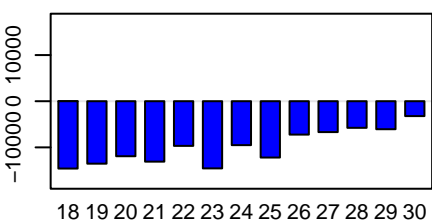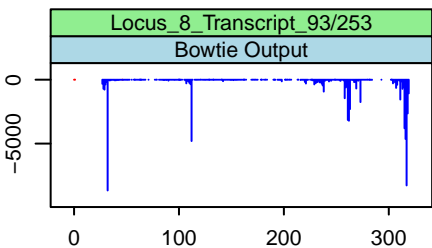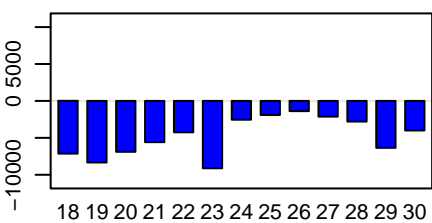

Coordinates/read size

# Readmaps and size distributions

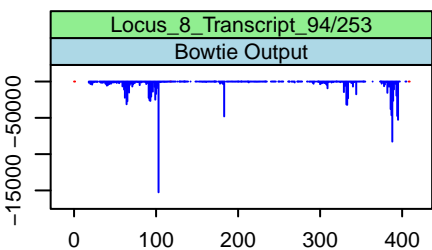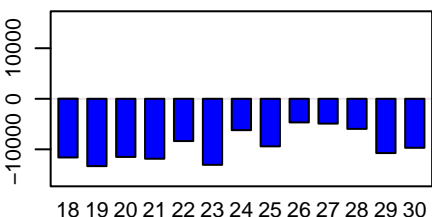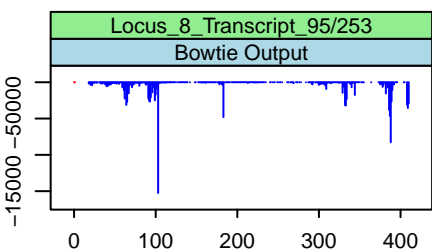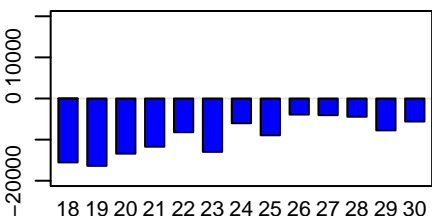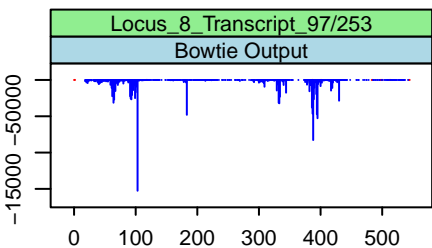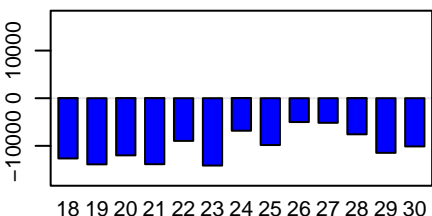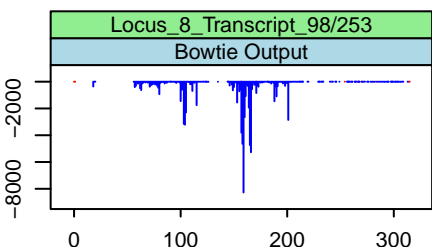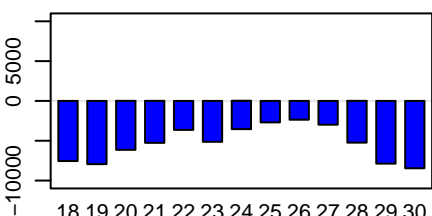

Coordinates/read size



# Readmaps and size distributions

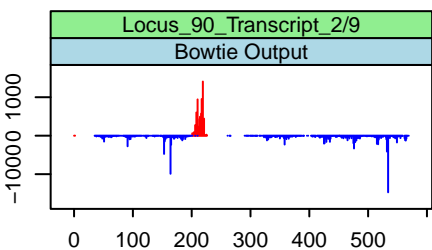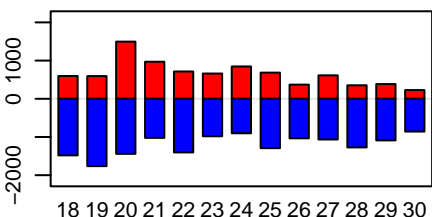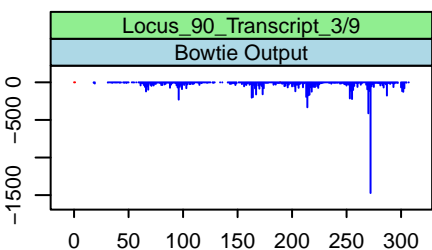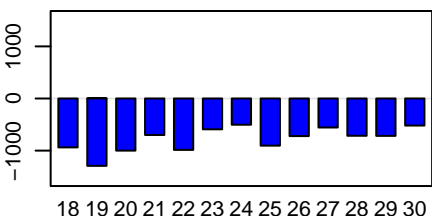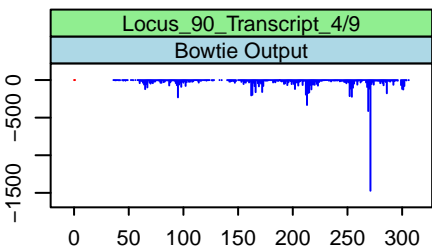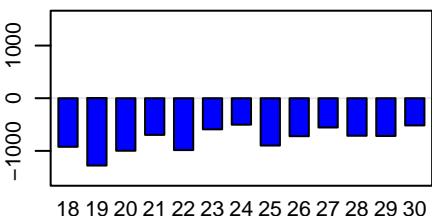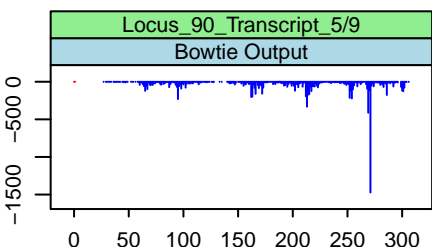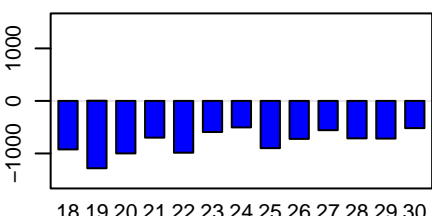

Coordinates/read size

# Readmaps and size distributions

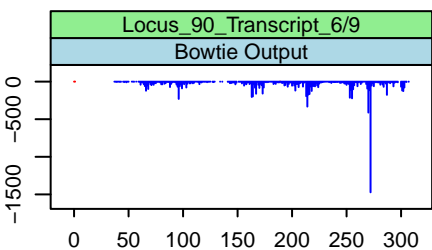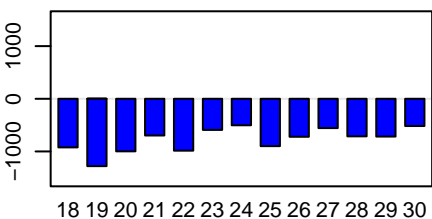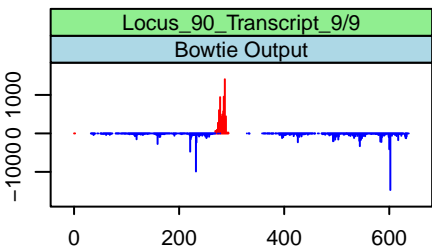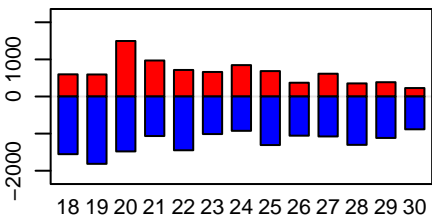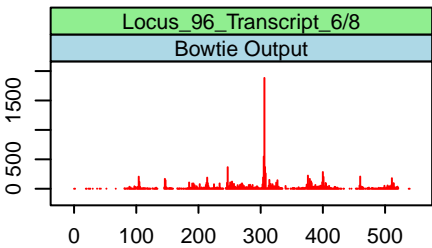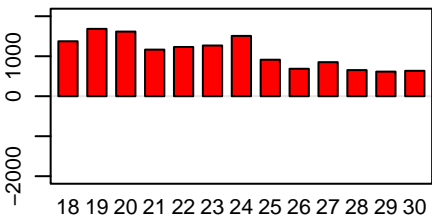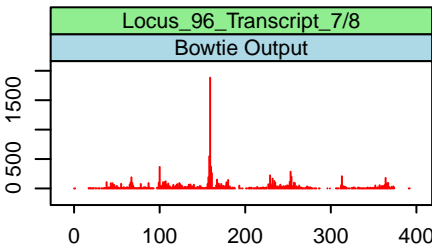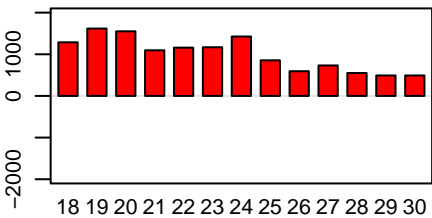

Coordinates/read size

# Readmaps and size distributions

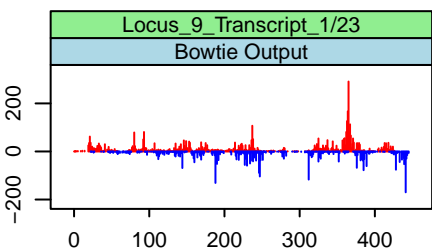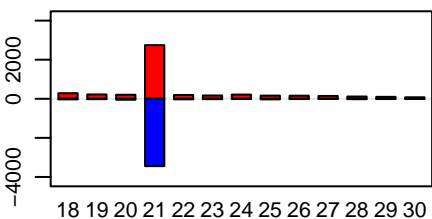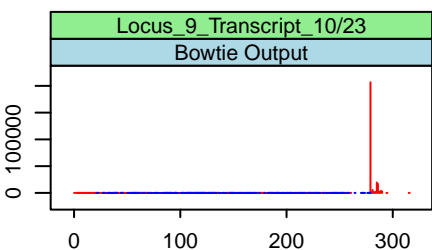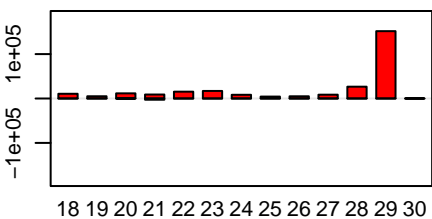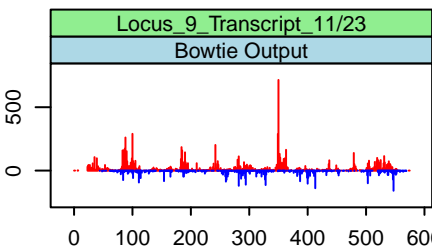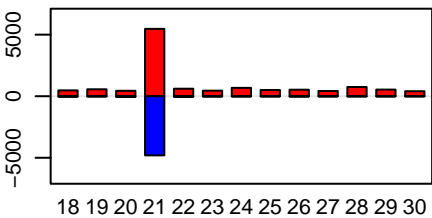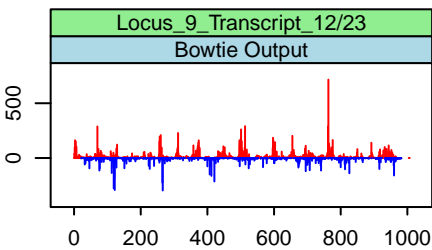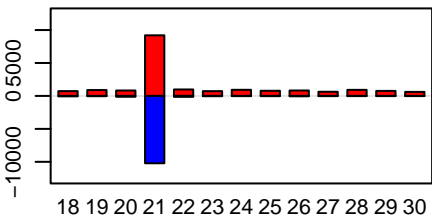

Coordinates/read size

Number of reads

# Readmaps and size distributions

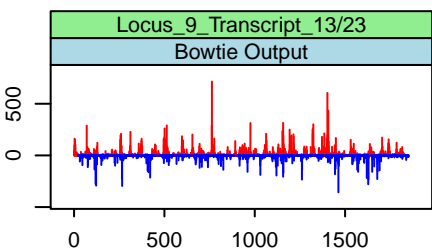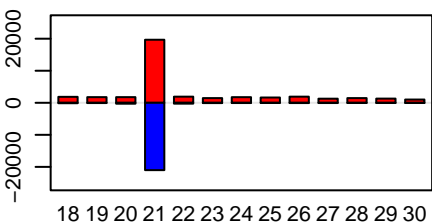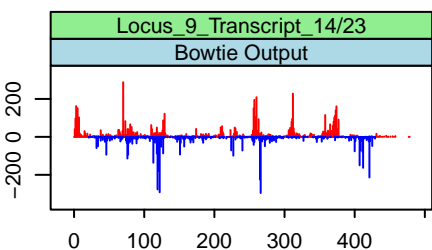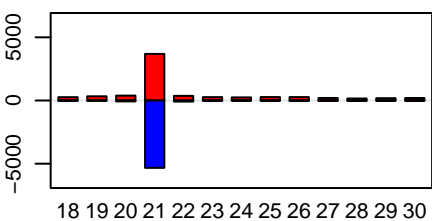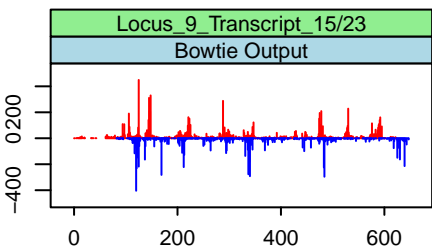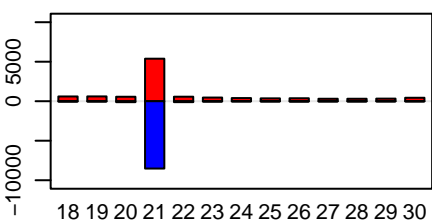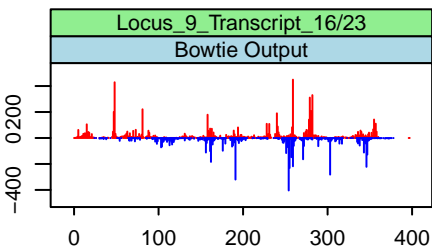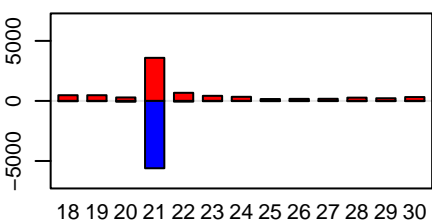

Coordinates/read size

# Readmaps and size distributions

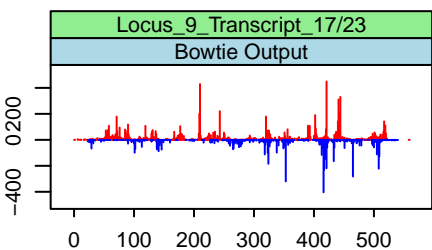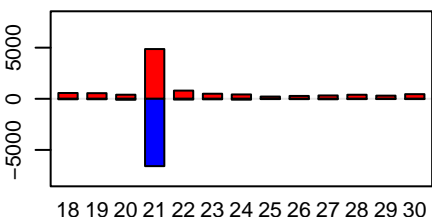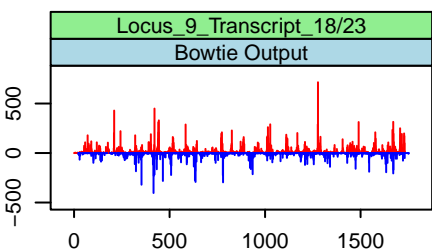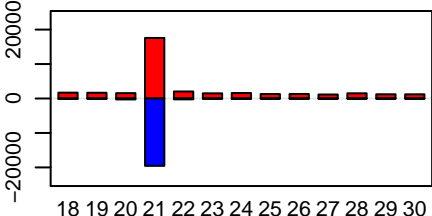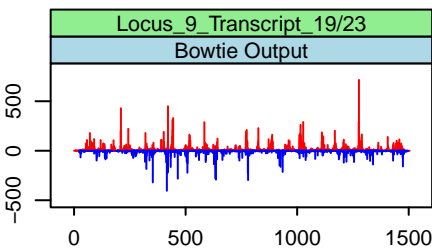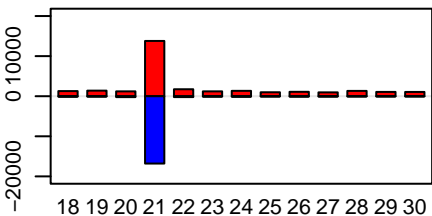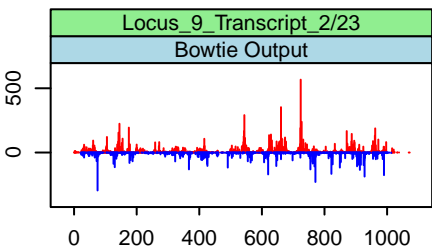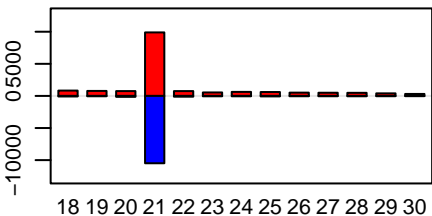

Coordinates/read size

Number of reads

# Readmaps and size distributions

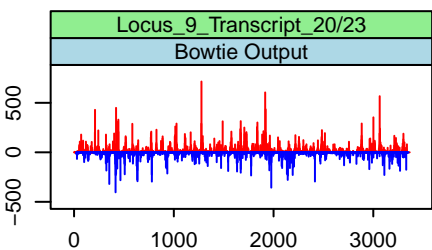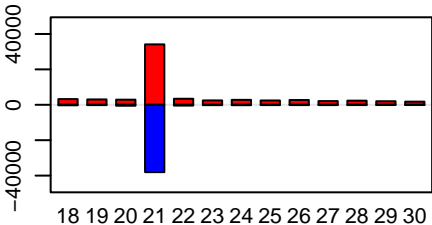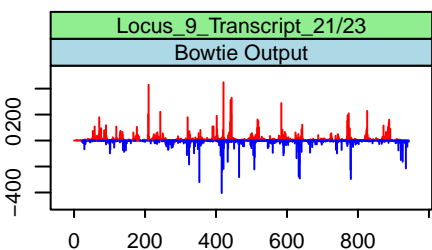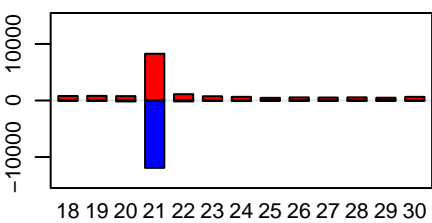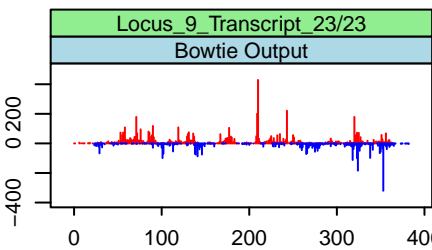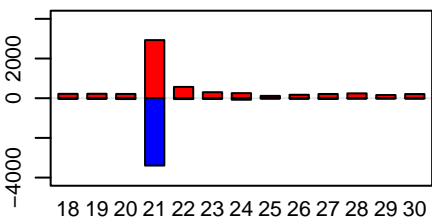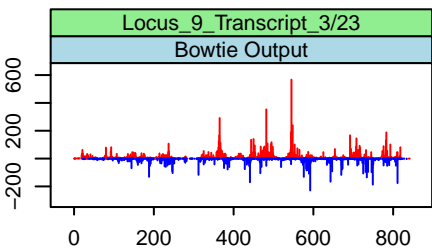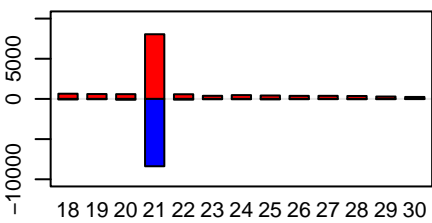

Coordinates/read size

Number of reads

# Readmaps and size distributions

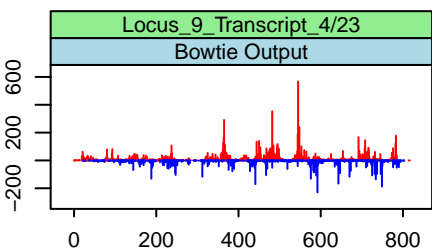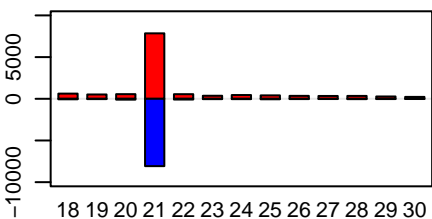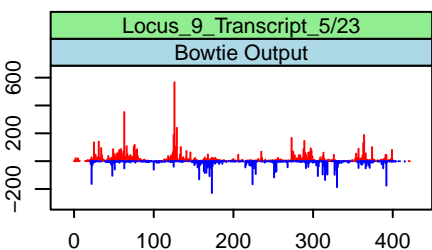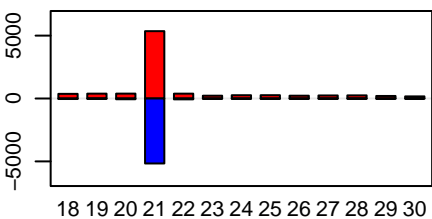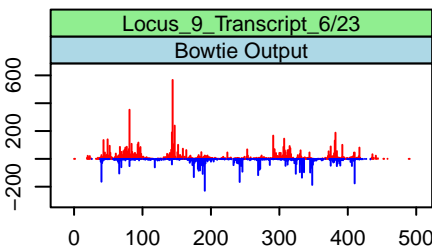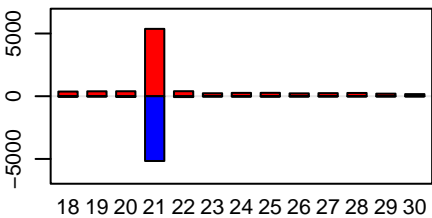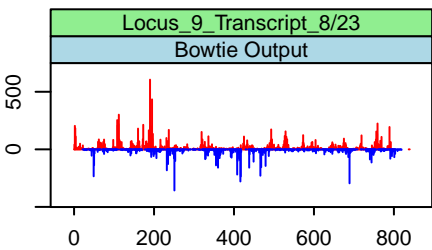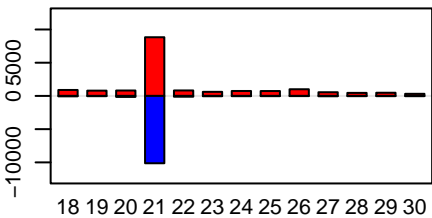

Coordinates/read size

# Readmaps and size distributions

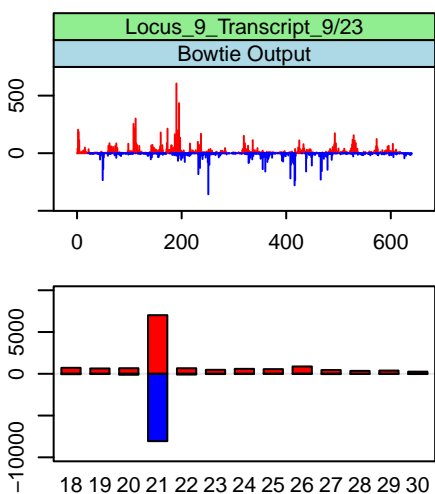

Number of reads

Coordinates/read size
