# Supplementary material for: Metavisitor, a Suite of Galaxy Tools for Simple and Rapid Detection and Discovery of Viruses in Deep Sequence Data
Source: PubMed Central journal article supplement (PMC5207757; doi:10.1371/journal.pone.0168397), 2017-01-03
Supplement: pone.0168397.s039.pdf [file pone.0168397.s039.pdf]

| <b>Supplementary Table S2</b>                       |                                 |
|-----------------------------------------------------|---------------------------------|
| <b>Workflow</b>                                     | <b>execution time (h:mm:ss)</b> |
| Use Case 1-1                                        | 0:12:14                         |
| Use Case 1-2                                        | 0:46:07                         |
| Use Case 1-3                                        | 0:48:23                         |
| Remapping in Use cases 1-1                          | 0:08:35                         |
| Use Case 1-4                                        | 0:08:19                         |
| Use Case 2-1                                        | 1:49:24                         |
| Small RNA profiling of Oases contigs (Use Case 2-1) | 0:29:55                         |
| Use Case 2-2                                        | 2:55:12                         |
| Trinity test in Use Case 2-2                        | 0:50:05                         |
| Spades test in Use Case 2-2                         | 0:40:28                         |
| Use Case 3-1                                        | 1:03:39                         |
| Use Case 3-2                                        | 0:50:43                         |
| Use Case 3-3 (Ebola)                                | 0:04:41                         |
| Use Case 3-3 (Lassa L)                              | 1:42:06                         |
| Use Case 3-3 (Lassa S)                              | 1:41:31                         |
