# Supplementary material for: Metavisitor, a Suite of Galaxy Tools for Simple and Rapid Detection and Discovery of Viruses in Deep Sequence Data
Source: PLOS journal article supplement (doi:10.1371/journal.pone.0168397), 2017-01-03
Supplement: S6 (10.1371/journal.pone.0168397.s006) [file journal.pone.0168397.s006]

Supplementary Figure S6

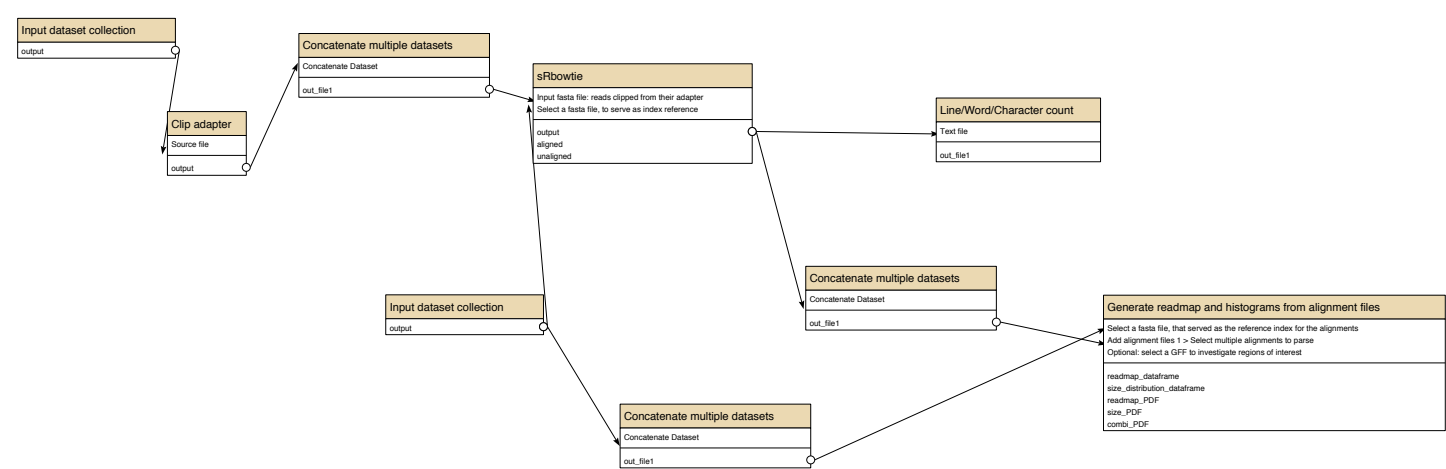

Metavisitor: Workflow for remapping in Use Cases 1-1,2,3
